# Supplementary material
Source: MDPI journal article supplement (https://www.mdpi.com/2072-4292/12/12/1919)
Supplement: s1 [file s1]

Archive with 4 entries (4 files):
- SupplementaryMaterial.pdf
- SupplementaryMaterial1.csv
- SupplementaryMaterial2.csv
- SupplementaryMaterial3.csv
