# Supplementary material
Source: MDPI journal article supplement (https://www.mdpi.com/2072-4292/12/12/1919)
Supplement: s1 [file s1 › SupplementaryMaterial1.csv]

LM10340291972213GDS03
LM10350291972232AAA04
LM10360281972233AAA02
LM10340281972249AAA05
LM10340291972249AAA05
LM10350281972250PAC03
LM10360281972251GMD05
LM10340291973135AAA04
LM10340281973189AAA04
LM10360291973191AAA04
LM10340281973279PAC07
LM10340291973279AAA04
LM10340281974112GMD05
LM10350281974113AAA04
LM10350291974113AAA04
LM10360281974114AAA05
LM10360291974186AAA05
LM10360281974204AAA04
LM10340281974220AAA04
LM20360281975136AAA05
LM10350281975144AAA05
LM10350291975144AAA05
LM20350291975153AAA04
LM10360291975163AAA05
LM20350281975171GDS03
LM20350291975171GDS03
LM20340281975188AAA04
LM10360291975199AAA05
LM20340281975206GDS02
LM20350281975207PAC10
LM20360291975208AAA05
LM10360291975217AAA05
LM10360291975235AAA05
LM20360291975244AAA04
LM20340281975278AAA05
LM20350291975279AAA04
LM20340281976111GDS03
LM20340291976111GDS03
LM10350291976121AAA02
LM10360291976122AAA05
LM20340281976129AAA04
LM20340291976129AAA04
LM20350281976130PAC07
LM20350291976130AAA04
LM20360291976131GDS02
LM10340281976138AAA02
LM10350291976139GDS03
LM20360281976149GDS03
LM20360291976149AAA05
LM20360291976167GDS05
LM20360291976203GDS03
LM20350291976220GDS03
LM20360281976221PAC03
LM20360291976221AAA02
LM10340281976228AAA02
LM20340281976237GDS02
LM20350281976238GDS03
LM20350291976238GDS03
LM20360291976239GDS03
LM10360281976248PAC04
LM10360291976248AAA05
LM20360281976257GDS02
LM20360291976257GDS02
LM10340291976264GDS03
LM10350291976265AAA05
LM10360281976266GDS03
LM10360291976266AAA05
LM20340281976273GDS02
LM20350281976274AAA04
LM20350291976274AAA04
LM20360281976275AAA05
LM20360291976275AAA05
LM10340281976282AAA02
LM10340291976282AAA02
LM10350291976283GDS03
LM10360281976284GDS03
LM10360291976284GDS03
LM20360291977107GDS04
LM20340291977123GDS08
LM20350291977124GDS03
LM20360281977125AAA05
LM20360291977125AAA05
LM10360281977131GDS04
LM10350281977148GDS03
LM20340281977159GDS08
LM10360291977185GDS07
LM20360281977197GDS04
LM20360291977197GDS04
LM20350291977214GDS04
LM20360291977215GDS04
LM10350291977220GDS04
LM10360291977221GDS04
LM20360291977233GDS04
LM10350281977256PAC05
LM20350281977286GDS04
LM20350291977286GDS04
LM20360281978120AAA03
LM20340281978136GDS03
LM20340291978136GDS03
LM20350281978137AAA02
LM20340281978154AAA02
LM20360281978156AAA02
LM20360291978156AAA02
LM30360281978165AAA04
LM20340281978172AAA05
LM20360281978174AAA04
LM20360291978174AAA04
LM20340281978208GDS03
LM20350281978209AAA04
LM30340281978217AAA04
LM20360281978228PAC03
LM20360291978228AAA02
LM20360281978246AAA02
LM20360291978246AAA02
LM20350291978263GDS03
LM20360281978264AAA04
LM20360291978264AAA04
LM20350291979204AAA05
LM20360281979223AAA05
LM20360291979223AAA05
LM20360281979241AAA05
LM20360291979241AAA05
LM20340281979257AAA05
LM20350281979258PAC09
LM20350291979258AAA08
LM20360291979259AAA05
LM20360281979277AAA05
LM20360291979277AAA05
LM30340291980153AAA07
LM30350291980154AAA03
LM20340281980162AAA05
LM20350281980181AAA03
LM20350291980181AAA03
LM20360281980182PAC10
LM20350291980199AAA05
LM20360281980200AAA08
LM20360291980200AAA08
LM30360291980209AAA06
LM20360281980218AAA03
LM20360291980218AAA03
LM20340281980234AAA05
LM20340291980234AAA05
LM20360291980254AAA05
LM20340281980270AAA05
LM20360281980272AAA04
LM20360291980272AAA03
LM20350291981121AAA11
LM20360281981140AAA04
LM20340281981156AAA04
LM20350281981157AAA03
LM20350291981157AAA03
LM20350291981175AAA03
LM20360281981176AAA03
LM20360291981176AAA03
LM20360281981212AAA04
LM20360291981212AAA04
LM20360281981230AAA03
LM20360291981230AAA03
LM20340281981264AAA03
LM20350291981265AAA03
LM20360281981266AAA03
LM20360291981266AAA03
LM20340281981282AAA09
LM20340291981282AAA09
LM20350281981283AAA03
LM20350291981283AAA03
LM30350281982107AAA04
LM30350291982107AAA04
LM30360281982108AAA04
LM30360291982108AAA04
LM30340281982124AAA03
LM30340291982124AAA03
LM30350281982125AAA04
LM30350291982125AAA04
LM30360291982144AAA03
LM30350281982161AAA04
LM30350291982161AAA04
LM30360281982162AAA03
LM30360291982162AAA03
LM30350291982179AAA03
LM30360291982216AAA03
LM30350281982251AAA03
LM30350291982251AAA03
LM40330281983115AAA03
LM40330291983115AAA03
LM40320291983124AAA03
LM40320291983140AAA04
LM40330281983147AAA03
LM40330291983147AAA03
LM40330281983195AAA03
LM40330291983195AAA03
LM40330291983211AAA03
LM40320281983220AAA03
LM40330291983227PAC00
LM40330281983243AAA03
LM40330291983243AAA03
LM40330281983259AAA03
LM40330291983259AAA03
LM40320281983268AAA03
LM40320291983268AAA03
LM40320281984111AAA03
LT50330281984126PAC04
LM40330281984134AAA03
LM40330291984134AAA03
LM40320281984143AAA03
LM40330281984150AAA03
LM40330291984150AAA03
LT50330291984158XXX03
LT50330291984174XXX03
LT50320281984183XXX04
LT50330281984190XXX04
LT50330291984190XXX08
LM40330291984198AAA03
LT50320281984199PAC09
LT50320291984199PAC05
LT50320291984215AAA05
LT50330281984222AAA04
LM50330291984222AAA03
LM40320281984223AAA04
LM40320291984223AAA04
LM50330281984238AAA03
LT50330291984238PAC00
LT50320281984247XXX04
LT50320291984247XXX04
LT50320281984263XXX03
LM50320291984263AAA03
LM50330291984286AAA03
LT50330281985112XXX05
LM50330291985112AAA03
LT50320281985121XXX04
LT50320291985121XXX04
LT50330281985128PAC04
LT50330291985128PAC04
LT50320281985137PAC04
LT50320291985137AAA03
LT50330291985144PAC04
LT50320281985185PAC10
LM50320291985185AAA03
LM50330291985192AAA03
LT50320281985201XXX03
LT50320291985201XXX04
LM50330291985208AAA03
LT50320281985217XXX03
LT50320291985217PAC04
LT50330291985224XXX03
LT50320281985233PAC04
LT50320291985233PAC04
LT50330281985240XXX04
LT50330291985240XXX04
LM50320281985249AAA05
LM50320291985249AAA06
LT50330281985256XXX03
LM50330291985256AAA03
LM40330281985264PAC00
LT50320281986124AAA03
LT50320291986124AAA03
LT50330281986131XXX03
LT50330291986131XXX03
LT50320281986140XXX10
LT50320291986140PAC05
LT50330281986147XXX04
LT50330291986147XXX03
LT50330281986163XXX03
LT50330291986163XXX03
LT50320281986172XXX02
LT50330281986179XXX01
LT50330291986179XXX04
LT50330281986195XXX03
LT50330291986195XXX03
LT50320281986204XXX03
LT50320291986204XXX03
LM50330281986211AAA04
LT50330291986211XXX08
LT50320281986220XXX03
LT50320291986220XXX03
LT50330281986227XXX03
LT50330291986227XXX03
LT50320281986236XXX03
LT50320291986236XXX03
LM50330291986243AAA03
LT50320281986268XXX03
LT50320291986268XXX04
LT50320281987111XXX02
LT50320291987111XXX02
LT50330281987118XXX02
LT50330291987118XXX02
LT50320281987127XXX02
LT50320291987127XXX02
LT50330281987134XXX09
LT50330291987134XXX03
LT50320281987143XXX02
LT50330281987150XXX02
LT50330291987150XXX02
LT50330281987166XXX02
LT50330291987166XXX02
LT50320281987175XXX02
LT50330291987182XXX02
LM50320281987191AAA03
LT50320291987191XXX02
LT50320281987207XXX02
LT50320291987207XXX02
LT50330281987214XXX02
LT50330291987214XXX02
LT50320281987223XXX02
LT50320291987223XXX02
LT50330281987230XXX02
LT50330291987230XXX02
LT50330281987246XXX02
LT50330291987246XXX02
LT50320281987255XXX02
LT50320291987255XXX02
LT50330281987262XXX02
LT50330291987262XXX02
LT50330281987278XXX03
LT50330291987278XXX03
LT50320281988114XXX03
LT50320291988114XXX03
LT50330291988121XXX03
LT50320281988130XXX03
LT50320291988130XXX03
LT50330281988137XXX03
LT50330291988137XXX03
LT50320281988146XXX03
LT50320281988162XXX03
LT50320291988162XXX03
LT50330281988169XXX03
LT50330291988169XXX03
LT50330281988185XXX03
LT50330291988185XXX03
LT40330291988209XXX07
LT50320281988210XXX03
LT50320291988210XXX03
LT50320291988226XXX03
LT50330281988233XXX01
LT50330291988233XXX01
LT50320281988242XXX03
LT50320291988242XXX03
LT50330281988249XXX03
LT50330291988249XXX03
LT50320281988274XXX03
LT50320291988274XXX03
LT50330281988281XXX03
LT50330291988281XXX03
LM40320281989108AAA03
LM40320291989108AAA03
LM40320281989140AAA03
LM40330291989147AAA03
LT50320281989148XXX02
LT50320291989148XXX02
LT50330281989155XXX02
LT50330281989171XXX02
LT50330291989171XXX02
LM40330291989179AAA03
LT40320291989188XXX02
LT50320281989196XXX02
LT50330281989203XXX02
LT50330291989203XXX02
LT50320281989212XXX03
LT50320291989212XXX03
LT50330281989219XXX02
LT50330291989219XXX02
LT40330281989227XXX02
LT40330291989227XXX02
LT50320281989228XXX07
LT50320291989228XXX07
LT50330281989235XXX07
LT50330291989235XXX07
LM40330291989243AAA03
LT50320281989244AAA02
LT50320291989244AAA02
LM40330291989259AAA03
LT50320281989260XXX02
LT50320291989260XXX02
LT50330291989267XXX02
LM40320291989268AAA03
LT50320281989276XXX02
LT50330281989283XXX02
LT50330291989283XXX03
LT50330281990110XXX03
LT50330291990110XXX03
LM40320281990111AAA01
LM40320291990111AAA01
LT50330281990126XXX03
LT50330291990126XXX03
LT50330281990142XXX03
LT50330291990142XXX03
LT50330281990174XXX05
LT50330291990174XXX05
LT50320281990247PAC04
LT50320291990247XXX03
LT50330281990254XXX04
LT50330291990254XXX04
LT50320291991106XXX03
LT50330281991113XXX03
LT50330291991113XXX03
LT50320281991138AAA03
LT50330281991145XXX03
LT50330291991145XXX03
LT50330281991161XXX03
LT50330291991161XXX03
LT50330281991177XXX01
LT50320281991186PAC04
LT50320291991186XXX03
LT50330281991193PAC04
LT50330291991193XXX03
LT50330281991209AAA03
LT50330291991209AAA03
LT50330281991225XXX03
LT50330291991225XXX03
LT50320281991234PAC04
LT50320291991234XXX03
LT50330281991241XXX02
LT50330291991241XXX02
LT50320281991250XXX02
LT50330281991257XXX02
LM50330291991257AAA03
LT50330291991273XXX02
LT50320281991282XXX02
LT50320291991282XXX02
LT50320281992125XXX02
LT50320291992125XXX02
LT50330281992132XXX02
LT50330291992132XXX02
LT50320281992141XXX02
LT50320291992141XXX02
LT50330281992148AAA02
LT50330291992148AAA02
LT50330281992164XXX02
LT50330291992164XXX02
LT50330281992180XXX01
LM50330291992196AAA03
LT50330281992212XXX02
LT50330291992212XXX02
LT50320281992221AAA04
LT50320291992221XXX03
LT50330281992228XXX02
LT50330291992228XXX02
LT50330281992244XXX02
LT50330291992244XXX02
LT50320281992253XXX02
LT50320291992253XXX02
LT50330281992260XXX02
LT50330291992260XXX02
LT50330281992276XXX02
LT50330291992276XXX02
LT50320281992285XXX02
LM50320291992285AAA03
LT50320281993111XXX02
LT50320291993111XXX02
LT50320291993127XXX02
LT50330281993134AAA02
LT50330291993134AAA02
LT50320291993175XXX02
LT50330281993182XXX02
LT50330291993182XXX02
LT50330281993198XXX02
LT50330291993198XXX02
LT50320281993207AAA02
LT50330281993214XXX02
LT50330291993214XXX02
LT50330281993230XXX02
LT50320281993239PAC03
LT50320291993239PAC03
LT50330281993246AAA40
LT50330291993246AAA40
LT50320281993271XXX02
LT50320291993271XXX02
LT50330281993278XXX02
LT50330291993278XXX02
LT50320291993287XXX02
LT50320281994114AAA02
LT50320291994114AAA02
LT50330281994137XXX02
LT50320281994146AAA02
LT50320291994146AAA02
LT50320281994162XXX02
LT50320291994162XXX02
LT50320281994178XXX02
LT50320291994178XXX02
LT50330281994185XXX02
LT50330291994185XXX02
LT50330291994201XXX02
LT50320281994210XXX02
LT50330281994217XXX03
LT50320281994226XXX01
LT50320291994226XXX01
LT50330281994233XXX02
LT50330291994233XXX02
LT50330281994249XXX01
LT50330291994249XXX01
LT50330281994265AAA02
LT50330291994265AAA02
LT50330281994281XXX02
LT50330291994281XXX02
LT50320281995117XXX01
LT50320291995117XXX01
LT50330281995124XXX01
LT50330291995124XXX01
LT50330281995140XXX02
LT50330291995140XXX02
LT50320281995149AAA02
LT50320291995149AAA02
LT50320291995165XXX01
LT50320291995181XXX01
LT50330281995188AAA01
LT50330291995188AAA01
LT50320291995197XXX02
LT50330281995204XXX00
LT50330291995204XXX00
LT50320281995213XXX02
LT50320291995213XXX02
LT50330281995220XXX02
LT50330291995220XXX02
LT50320281995229XXX01
LT50320291995229XXX01
LT50330291995236XXX02
LT50320281995245XXX01
LT50320291995245XXX01
LT50320281995261XXX01
LT50330281995268AAA01
LT50330291995268AAA01
LT50330281995284XXX02
LT50330291995284XXX02
LT50330281996111XXX00
LT50330291996111XXX00
LT50320281996136AAA02
LT50320291996136AAA02
LT50320281996152AAA02
LT50320291996152AAA02
LT50330281996159XXX02
LT50330291996159XXX02
LT50330291996175AAA02
LT50320281996184XXX02
LT50320291996184XXX02
LT50330281996191XXX02
LT50330291996191XXX02
LT50320281996200XXX00
LT50320291996200XXX00
LT50330281996207XXX02
LT50330291996207XXX02
LT50330281996223AAA02
LT50330291996223AAA02
LT50320281996232XXX02
LM50320291996232PAC00
LT50330281996239XXX02
LT50330291996239XXX02
LT50320281996248XXX01
LT50320291996248XXX01
LT50330281996255AAA02
LT50330291996255AAA02
LT50330291996271XXX02
LT50330281997129AAA02
LT50330291997129AAA03
LT50330281997161AAA02
LT50330291997161AAA02
LT50320291997170AAA02
LT50330281997177AAA02
LT50330291997177AAA02
LT50330281997193XXX02
LT50330291997193XXX02
LT50320281997218XXX01
LT50320291997218XXX01
LT50320281997234XXX02
LT50320291997234XXX02
LT50320281997250XXX02
LT50320291997250XXX02
LT50330291997257XXX02
LT50320281997266XXX02
LT50320291997266XXX02
LT50330281997273XXX02
LT50330291997273XXX02
LT50320281997282XXX02
LT50320291997282XXX02
LT50320281998125XXX01
LT50320291998125XXX01
LT50330281998132XXX02
LT50330291998132XXX02
LT50330281998148XXX03
LT50330291998148XXX03
LT50320281998173XXX01
LT50320291998173XXX01
LT50330281998180XXX02
LT50330291998180XXX02
LT50320281998189XXX01
LT50320291998189XXX01
LT50330281998196XXX02
LT50330291998196XXX02
LT50320281998205XXX02
LT50320291998205XXX02
LT50320281998221XXX01
LT50320291998221XXX01
LT50330281998228XXX02
LT50330291998228XXX02
LT50320281998237XXX02
LT50320291998237XXX02
LT50330281998244XXX03
LT50330291998244XXX03
LT50320281998253XXX01
LT50320291998253XXX01
LT50330281998260XXX02
LT50330291998260XXX03
LT50320281999112XXX01
LT50320281999128XXX01
LT50320291999128XXX01
LT50330291999135XXX02
LT50320281999144AAA01
LT50320291999144AAA01
LT50320291999160XXX01
LT50320291999176XXX01
LE70320281999184EDC00
LE70320291999184EDC00
LE70330291999191EDC00
LT50320281999192AAA01
LT50320291999192AAA01
LT50330291999199AAA01
LE70330281999207EDC00
LE70330291999207EDC00
LT50320281999208AAA01
LT50320291999208AAA01
LT50330281999215XXX01
LE70320281999216EDC00
LE70320291999216EDC00
LE70330281999223EDC00
LE70330291999223EDC00
LT50330281999231XXX00
LT50330291999231XXX00
LE70320281999232EDC00
LE70320291999232EDC00
LE70330281999239PAC01
LE70330291999239EDC00
LE70320281999248EDC01
LE70320291999248EDC01
LT50320281999256XXX01
LT50320291999256XXX01
LT50330281999263XXX02
LT50330291999263XXX02
LE70320281999264EDC00
LE70320291999264EDC00
LE70330281999271EDC00
LT50320281999272XXX01
LT50320291999272XXX01
LT50330281999279XXX02
LT50330291999279XXX02
LE70320281999280EDC00
LE70330281999287EDC00
LE70330291999287EDC00
LE70330282000114PAC01
LT50330282000122AAA01
LT50330292000122AAA01
LE70320282000123EDC00
LE70320292000123EDC00
LT50320282000131AAA03
LT50320292000131AAA03
LE70320282000139EDC00
LE70320292000139EDC00
LE70330292000146EDC00
LT50330282000154AAA02
LT50330292000154AAA02
LE70320282000155EDC00
LE70320292000155EDC00
LE70330282000162EDC00
LE70330292000162EDC00
LT50320282000163XXX02
LT50320292000163XXX02
LT50330282000170XXX03
LT50330292000170XXX03
LE70320292000171EDC00
LE70330292000178EDC00
LE70320282000187EDC00
LE70320292000187EDC00
LE70330282000194EDC00
LE70330292000194EDC00
LT50320282000195AAA02
LT50320292000195AAA02
LT50330282000202XXX02
LE70320292000203EDC00
LE70330282000210EDC00
LE70330292000210EDC00
LT50330282000218XXX02
LT50330292000218XXX02
LE70320282000219EDC00
LE70320292000219EDC00
LE70330282000226PAC05
LE70330292000226PAC05
LT50320282000227XXX02
LT50320292000227XXX02
LT50330282000234XXX02
LT50330292000234XXX02
LT50320292000243AAA02
LT50330292000250XXX03
LE70320282000251EDC00
LE70320292000251EDC00
LE70330282000258EDC00
LE70330292000258EDC00
LT50320282000259XXX02
LT50320292000259XXX02
LT50330282000282XXX02
LT50330292000282XXX02
LE70320282000283EDC01
LE70320292000283EDC01
LE70320292001109EDC00
LE70330282001116EDC00
LE70330292001116EDC00
LT50320282001117XXX02
LT50320292001117XXX02
LE70330282001132EDC00
LE70330292001132EDC00
LT50320282001133XXX02
LT50320292001133XXX02
LE70330282001148EDC00
LE70330292001148EDC00
LT50330292001156XXX02
LT50330282001172XXX02
LT50330292001172XXX02
LE70320282001173EDC01
LE70320292001173EDC01
LE70330282001180EDC00
LE70330292001180EDC00
LT50320282001181XXX01
LT50320292001181XXX01
LT50330282001188LGS02
LT50330292001188LGS02
LE70320282001189EDC00
LE70320292001189EDC00
LE70330292001196EDC00
LT50320282001197LGS01
LT50320292001197LGS01
LT50330282001204LGS01
LT50330292001204LGS01
LT50320282001213LGS01
LT50320292001213LGS01
LT50330282001220LGS01
LT50330292001220LGS01
LE70330282001228EDC00
LE70330292001228EDC00
LT50320282001229LGS01
LT50320292001229LGS01
LT50330282001236LGS01
LT50330292001236LGS01
LE70320282001237EDC00
LE70320292001237EDC00
LE70330282001244EDC00
LE70330292001244EDC00
LT50320282001245LGS01
LT50320292001245LGS01
LT50330282001252LGS01
LT50330292001252LGS01
LE70320282001253EDC00
LE70320292001253EDC00
LT50330282001268LGS01
LT50330292001268LGS01
LE70320282001269EDC00
LE70320292001269EDC00
LE70320282002112EDC01
LE70320292002112EDC01
LE70330282002119EDC00
LE70330282002135EDC00
LE70330292002135EDC00
LE70330282002151EDC00
LE70330292002151EDC00
LE70320292002160EDC00
LE70330282002167EDC00
LE70330292002167EDC00
LT50330282002175LGS03
LT50330292002175LGS03
LE70320282002176EDC00
LE70330282002183EDC00
LE70330292002183EDC00
LT50320282002184LGS01
LT50320292002184LGS01
LT50330292002191LGS01
LT50320282002200LGS01
LT50330282002207LGS01
LT50330292002207LGS01
LE70320282002208EDC00
LE70320292002208EDC00
LE70330282002215EDC00
LE70330292002215EDC00
LT50320282002216LGS01
LT50330282002223LGS01
LT50330292002223LGS01
LE70330282002231EDC00
LE70330292002231EDC00
LT50330282002239LGS01
LT50330292002239LGS01
LE70320282002240EDC00
LE70330282002247EDC00
LT50320282002248LGS01
LT50320292002248LGS01
LE70330282002263EDC00
LE70330292002263EDC00
LE70330282002279EDC00
LE70330292002279EDC00
LT50330282002287LGS01
LT50330292002287LGS01
LT50320292003107LGS01
LE70320282003115EDC00
LE70320292003115EDC00
LE70330282003122EDC00
LT50320282003123LGS01
LT50330282003146LGS01
LT50330292003146LGS01
LT50320292003155LGS01
LT50320282003171LGS02
LT50320292003171LGS02
LT50330292003178LGS01
LT50320282003187PAC03
LT50320292003187PAC03
LT50330282003194PAC03
LT50330292003194PAC03
LE70330292003202EDC01
LT50330282003210PAC02
LE70320282003211EDC03
LE70320292003211EDC03
LE70330282003218EDC02
LE70330292003218EDC02
LT50320282003219PAC03
LT50320292003219PAC03
LT50330282003226LGS01
LT50330292003226PAC02
LE70320282003227EDC01
LE70320292003227EDC01
LE70330282003234EDC01
LE70330292003234EDC01
LT50320282003235PAC03
LT50320292003235PAC03
LT50330282003242PAC02
LT50320282003251PAC02
LT50320292003251PAC02
LT50330282003258PAC02
LT50330292003258PAC02
LE70330282003266EDC01
LE70330292003266EDC01
LT50320282003267PAC02
LT50320292003267PAC02
LT50330282003274LGS01
LT50330292003274PAC02
LE70330282003282EDC01
LE70330292003282EDC01
LT50320282003283PAC02
LT50320292003283PAC02
LT50320282004110PAC03
LT50330282004117PAC02
LT50330292004117PAC02
LE70320282004118EDC03
LE70320292004118EDC03
LE70330282004125EDC03
LE70330292004125EDC03
LT50320282004126PAC02
LT50320292004126PAC02
LE70330282004141EDC01
LT50320282004142PAC02
LT50320292004142PAC02
LT50330292004149PAC03
LE70320292004150EDC02
LE70330282004157EDC01
LE70330292004157EDC01
LT50320282004158PAC02
LT50320292004158PAC02
LT50330292004165PAC02
LE70320282004166EDC01
LE70320292004166EDC01
LT50320292004174PAC02
LT50330282004181PAC01
LT50330292004181PAC01
LE70320282004182EDC01
LE70320292004182EDC01
LE70330292004189EDC01
LT50330292004197PAC01
LE70320292004198EDC02
LT50320282004206PAC01
LT50330282004213PAC02
LT50330292004213PAC02
LE70320282004214EDC01
LE70320292004214EDC01
LE70330292004221EDC01
LT50330292004229PAC02
LE70330282004237EDC02
LE70330292004237EDC02
LT50320282004238PAC01
LT50320292004238PAC01
LT50330282004245PAC01
LT50330292004245PAC01
LE70320282004246EDC02
LE70320292004246EDC02
LE70330282004253EDC02
LE70330292004253EDC02
LT50320282004254PAC02
LT50320292004254PAC02
LT50330282004261PAC01
LT50330292004261PAC01
LE70320282004262EDC02
LE70320292004262EDC02
LE70330282004269EDC03
LE70330292004269EDC03
LT50320282004270PAC01
LT50320292004270PAC01
LT50330282004277PAC01
LT50330292004277PAC01
LE70320282004278EDC02
LE70320292004278EDC02
LE70330282004285EDC02
LE70330292004285EDC02
LT50320282004286PAC01
LT50320292004286PAC01
LT50320282005112PAC01
LT50330282005135PAC01
LT50330292005135PAC01
LE70330282005143EDC00
LE70330292005143EDC00
LT50320282005144PAC01
LE70320282005152EDC00
LE70330292005159EDC00
LT50330282005167PAC01
LT50330292005167PAC01
LE70320282005168EDC00
LE70320292005168EDC00
LT50320282005176PAC01
LT50320292005176PAC01
LT50330282005183PAC01
LT50330292005183PAC01
LE70320282005184EDC00
LE70320292005184EDC00
LE70330282005191EDC00
LE70330292005191EDC00
LT50320282005192PAC01
LT50320292005192PAC01
LT50330282005199PAC01
LT50330292005199PAC01
LE70320282005200EDC00
LE70320292005200EDC00
LT50320282005208PAC01
LT50320292005208PAC01
LE70320282005216EDC00
LE70320292005216EDC00
LE70330282005223EDC00
LE70330292005223EDC00
LT50320282005224GNC01
LT50320292005224GNC01
LT50330282005231PAC01
LE70320282005232EDC00
LE70320292005232EDC00
LE70330282005239EDC00
LE70330292005239EDC00
LT50320282005240PAC01
LT50320292005240PAC01
LE70320292005248EDC00
LT50320282005256PAC01
LT50320292005256PAC01
LT50330282005263EDC00
LT50330292005263PAC01
LE70330282005271EDC00
LT50320282005272PAC01
LT50320292005272PAC01
LT50330292005279PAC01
LE70320282005280EDC00
LE70320292005280EDC00
LE70330292005287EDC00
LT50320282005288PAC01
LT50320292005288PAC01
LT50330282006106PAC01
LT50330292006106EDC00
LE70320292006107EDC00
LT50320282006115PAC01
LT50320292006115PAC01
LT50330292006122PAC01
LE70320292006123EDC00
LT50320282006131PAC01
LT50320292006131PAC01
LT50330282006138PAC01
LT50330292006138PAC01
LE70320282006139EDC00
LE70320292006139EDC00
LE70330282006146EDC00
LE70330292006146EDC00
LT50320282006147PAC01
LT50320292006147PAC01
LT50330282006154PAC01
LE70320282006155EDC00
LE70320292006155EDC00
LT50320292006163PAC01
LE70320282006171EDC00
LE70330282006178EDC00
LE70330292006178EDC00
LT50320282006179PAC02
LT50320292006179PAC02
LT50330282006186PAC01
LT50330292006186PAC01
LE70320292006187EDC00
LE70330282006194EDC00
LE70330292006194EDC00
LT50320282006195PAC02
LT50320292006195PAC02
LE70320282006203EDC00
LE70320292006203EDC00
LE70330282006210EDC00
LE70330292006210EDC00
LT50320282006211PAC01
LT50320292006211PAC01
LT50330282006218PAC01
LE70320282006219EDC00
LE70320292006219EDC00
LE70330282006226EDC00
LE70330292006226EDC00
LT50320282006227PAC01
LT50320292006227PAC01
LT50330282006234PAC01
LT50330292006234PAC01
LE70320292006235EDC00
LE70330282006242EDC00
LE70330292006242EDC00
LT50320282006243PAC02
LT50320292006243PAC02
LT50330282006250PAC01
LT50330292006250PAC01
LE70320282006251EDC00
LE70320292006251EDC00
LE70330282006258EDC00
LT50320292006259PAC02
LT50330282006266PAC01
LE70320282006267EDC00
LE70330282006274EDC00
LE70330292006274EDC00
LT50320282006275PAC01
LT50320292006275PAC01
LE70320282007110EDC00
LE70320292007110EDC00
LE70330282007117EDC00
LT50320282007118PAC01
LT50320292007118PAC01
LE70320282007126EDC00
LE70320292007126EDC00
LE70330282007133EDC00
LE70330292007133EDC00
LT50330282007141PAC01
LE70330282007165EDC00
LE70330292007165EDC00
LT50330282007173PAC01
LT50330292007173PAC01
LE70320282007174EDC00
LE70320292007174EDC00
LE70330282007181EDC00
LE70330292007181EDC00
LT50320292007182PAC01
LE70320282007190EDC00
LE70320292007190EDC00
LT50320282007198PAC01
LT50320292007198PAC01
LT50330282007205PAC01
LT50330292007205PAC01
LE70320282007206EDC00
LE70320292007206EDC00
LE70330282007213EDC00
LE70330292007213EDC00
LT50320282007214PAC01
LT50320292007214PAC01
LT50330282007221PAC01
LT50330292007221PAC01
LE70320282007222EDC00
LE70320292007222EDC00
LT50330292007237PAC01
LE70320282007238EDC00
LE70320292007238EDC00
LE70330282007245EDC00
LE70330292007245EDC00
LT50320282007246PAC01
LT50320292007246PAC01
LT50330282007253PAC01
LT50330292007253PAC01
LE70320282007254EDC00
LE70320292007254EDC00
LT50320282007262PAC01
LT50320292007262PAC01
LT50330282007269PAC01
LT50330292007269PAC01
LE70320282007270EDC00
LE70320292007270EDC00
LE70330292007277EDC00
LT50330282008112PAC01
LT50330292008112PAC01
LE70320282008113EDC00
LE70320292008113EDC00
LE70330282008120EDC00
LE70330292008120EDC00
LT50320292008121PAC01
LT50330282008128PAC01
LT50330292008128PAC01
LT50320282008137PAC01
LT50320292008137PAC01
LE70330282008152EDC00
LE70330292008152EDC00
LT50320282008153PAC01
LT50320292008153PAC01
LT50330282008160PAC01
LT50330292008160PAC01
LE70330282008168EDC00
LE70330292008168EDC00
LT50330282008176EDC00
LT50330292008176EDC00
LE70320282008177EDC00
LE70320292008177EDC00
LT50320282008185PAC01
LT50330282008192PAC01
LT50330292008192PAC01
LE70320282008193EDC00
LE70320292008193EDC00
LE70330282008200EDC00
LT50320282008201PAC01
LT50320292008201PAC01
LT50330282008208PAC01
LT50330292008208PAC01
LE70320282008209EDC00
LE70320292008209EDC00
LE70330282008216EDC00
LE70330292008216EDC00
LT50330292008224PAC01
LE70320282008225EDC00
LE70320292008225EDC00
LE70330282008232EDC00
LE70330292008232EDC00
LT50320282008233PAC01
LT50320292008233PAC01
LE70320282008241EDC00
LE70320292008241EDC00
LE70330282008248EDC00
LE70330292008248EDC00
LT50330282008256PAC01
LE70320292008257EDC02
LE70330282008264EDC00
LE70330292008264EDC00
LE70320282008273EDC00
LE70320292008273EDC00
LE70330282008280EDC00
LE70330292008280EDC00
LT50320282008281PAC01
LT50320292008281PAC01
LT50330282008288PAC01
LT50330292008288PAC01
LE70320282008289EDC00
LE70320292008289EDC00
LE70320292009115EDC00
LE70330282009122EDC00
LE70330292009122EDC00
LT50320282009123PAC01
LT50330282009130PAC01
LT50330292009130PAC01
LE70320282009131EDC02
LE70320292009131EDC02
LE70330282009138EDC00
LE70330292009138EDC00
LT50320282009139PAC01
LT50320292009139PAC01
LE70320282009147EDC00
LE70320292009147EDC00
LT50320282009155PAC01
LT50320292009155PAC01
LE70330282009170EDC00
LE70330292009170EDC00
LT50320282009171PAC01
LT50330282009178PAC01
LT50330292009178PAC01
LE70320282009179EDC00
LE70320292009179EDC00
LE70330282009186EDC00
LE70330292009186EDC00
LT50320282009187PAC01
LT50320292009187PAC01
LE70320282009195EDC00
LE70320292009195EDC00
LE70330292009202EDC00
LT50320282009203PAC01
LT50320292009203PAC01
LT50320292009219PAC01
LE70320282009227EDC00
LE70320292009227EDC00
LT50320282009235PAC01
LT50330282009242PAC01
LT50330292009242PAC01
LE70320282009243EDC00
LE70320292009243EDC00
LE70330282009250EDC00
LE70330292009250EDC00
LT50330282009258PAC01
LT50330292009258PAC01
LE70320282009259EDC00
LE70320292009259EDC00
LE70330282009266EDC00
LE70330292009266EDC00
LT50320282009267PAC01
LT50320292009267PAC01
LE70330282010109EDC00
LE70330292010109EDC00
LT50320282010110PAC01
LE70320282010134EDC00
LE70320292010134EDC00
LE70320282010150EDC00
LE70320292010150EDC00
LE70320282010166EDC00
LE70320292010166EDC00
LE70330282010173EDC00
LE70330292010173EDC00
LT50330282010181EDC00
LT50330292010181EDC00
LE70320282010182EDC00
LE70320292010182EDC00
LE70330282010189EDC00
LT50320282010190PAC01
LT50320292010190PAC01
LT50330282010197EDC00
LT50330292010197EDC00
LE70320282010198EDC00
LE70320292010198EDC00
LE70330292010205EDC00
LT50320282010206PAC01
LT50320292010206PAC01
LT50330282010213PAC01
LE70320292010214EDC00
LE70330282010221EDC00
LE70330292010221EDC00
LT50320282010222PAC01
LT50320292010222PAC01
LT50330282010229PAC01
LT50330292010229PAC01
LE70320282010230EDC00
LE70320292010230EDC00
LE70330282010237EDC00
LE70330292010237EDC00
LT50320282010238PAC01
LT50320292010238PAC01
LE70320282010246EDC00
LE70320292010246EDC00
LE70330292010253EDC00
LT50320282010254EDC00
LT50320292010254EDC00
LE70330282010269EDC00
LE70330292010269EDC00
LT50320282010270EDC00
LT50320292010270EDC00
LT50330282010277EDC00
LT50330292010277EDC00
LE70320282010278EDC00
LE70320292010278EDC00
LE70330282010285EDC00
LE70330292010285EDC00
LT50320282010286EDC00
LT50320292010286EDC00
LE70320282011121EDC00
LE70320292011121EDC00
LE70330282011128EDC00
LE70330292011128EDC00
LT50320282011129PAC01
LT50330282011136PAC01
LT50330292011136PAC01
LE70320282011137EDC00
LT50320282011145PAC01
LT50330282011152PAC01
LT50330292011152PAC01
LT50330292011168PAC01
LE70320282011169EDC00
LE70320292011169EDC00
LE70330282011176EDC00
LE70330292011176EDC00
LT50330282011184PAC01
LT50330292011184PAC01
LE70320282011185EDC00
LE70320292011185EDC00
LT50320282011193PAC01
LT50330282011200PAC01
LT50330292011200PAC01
LE70320282011201EDC00
LE70320292011201EDC00
LE70330282011208EDC00
LE70330292011208EDC00
LT50320282011209PAC01
LT50320292011209PAC01
LT50330282011216PAC01
LT50330292011216PAC01
LE70320282011217EDC00
LE70320292011217EDC00
LE70330282011224EDC00
LE70330292011224EDC00
LT50320282011225PAC01
LT50320292011225PAC01
LT50330282011232PAC01
LT50330292011232PAC01
LE70320282011233EDC00
LE70320292011233EDC00
LE70330282011240EDC00
LE70330292011240EDC00
LT50330282011248PAC01
LT50330292011248PAC01
LE70330292011256EDC03
LT50320282011257PAC01
LT50320292011257PAC01
LT50330282011264PAC01
LT50330292011264PAC01
LE70320282011265EDC00
LE70320292011265EDC00
LE70330282011272EDC00
LE70330292011272EDC00
LT50320282011273PAC01
LT50320292011273PAC01
LT50330292011280PAC01
LE70330292011288EDC00
LE70330282012115EDC00
LE70330292012115EDC00
LT50320282012116EDC00
LT50320292012116EDC00
LE70320292012124EDC00
LE70330282012131EDC00
LE70330292012131EDC00
LE70320282012156EDC00
LE70320292012156EDC00
LE70320292012172EDC00
LE70330282012179EDC00
LE70330292012179EDC00
LE70330282012195EDC00
LE70330292012195EDC00
LM50320292012196EDC00
LE70320282012204EDC00
LE70320292012204EDC00
LE70330282012211EDC00
LE70320282012236EDC00
LE70320292012236EDC00
LE70330282012243EDC00
LE70330292012243EDC00
LE70320282012252EDC00
LE70320292012252EDC00
LE70330292012259EDC00
LE70320282012268EDC00
LE70320292012268EDC00
LE70330282012275EDC00
LE70330292012275EDC00
LE70320282012284EDC00
LE70320292012284EDC00
LE70330282013117EDC00
LE70330292013117EDC00
LC80330282013125LGN01
LC80330292013125LGN01
LE70320282013126EDC00
LE70320292013126EDC00
LC80320282013134LGN03
LC80320292013134LGN03
LE70320282013142EDC00
LC80330292013157LGN00
LE70320282013158EDC00
LE70320292013158EDC00
LE70330282013165EDC00
LE70330292013165EDC00
LC80320282013166LGN00
LC80320292013166LGN00
LC80330292013173LGN00
LE70320282013174EDC00
LE70320292013174EDC00
LE70330292013181EDC00
LC80320282013182LGN00
LC80320292013182LGN00
LE70320282013190EDC00
LE70320292013190EDC00
LE70330282013197EDC00
LE70330292013197EDC00
LC80320282013198LGN00
LC80320292013198LGN00
LC80330282013205LGN00
LC80330292013205LGN00
LE70320282013206EDC00
LE70320292013206EDC00
LE70330282013213EDC00
LC80330282013221LGN00
LC80330292013221LGN00
LE70330282013229EDC00
LE70330292013229EDC00
LC80330282013237LGN00
LC80330292013237LGN00
LE70320292013238EDC00
LE70330292013245EDC00
LC80330282013253LGN00
LE70320292013254EDC00
LE70330282013261EDC00
LE70330292013261EDC00
LC80330282013269LGN00
LC80330292013269LGN00
LC80330282014112LGN00
LC80330292014112LGN00
LE70330282014120EDC00
LC80320282014121LGN00
LC80320292014121LGN00
LE70320282014129EDC00
LE70320292014129EDC00
LC80320282014137LGN00
LC80320292014137LGN00
LC80330282014144LGN00
LC80320292014153LGN00
LC80330282014160LGN00
LC80330292014160LGN00
LE70320292014161EDC00
LC80330292014176LGN00
LE70330282014184EDC00
LE70330292014184EDC00
LC80320282014185LGN00
LC80330282014192LGN00
LC80330292014192LGN00
LE70330282014200EDC00
LE70330292014200EDC00
LC80320282014201LGN00
LC80320292014201LGN00
LC80330292014208LGN00
LE70320282014209EDC00
LE70320292014209EDC00
LC80330282014224LGN00
LC80330292014224LGN00
LE70320282014225EDC00
LE70320292014225EDC00
LC80320282014233LGN00
LC80320292014233LGN00
LC80330282014240LGN00
LE70320282014241EDC00
LE70320292014241EDC00
LE70330282014248EDC00
LE70330292014248EDC00
LC80320282014249LGN00
LC80320292014249LGN00
LC80330282014256LGN00
LC80330292014256LGN00
LE70330282014264EDC00
LE70330292014264EDC00
LC80320282014265LGN00
LE70330282014280EDC00
LC80330282014288LGN00
LC80330292014288LGN00
