# Supplementary material
Source: MDPI journal article supplement (https://www.mdpi.com/2072-4292/12/12/1919)
Supplement: s1 [file s1 › SupplementaryMaterial2.csv]

Blue	120	-1.75	Grassland	0.111	0.122	0.129	0.135	0.147	0.127	3.014E+7
Blue	120	-1.75	Cropland	0.106	0.121	0.128	0.135	0.150	0.126	8.371E+6
Blue	120	-1.75	PastureHay	0.103	0.112	0.119	0.125	0.141	0.118	6.645E+5
Blue	120	-1.75	Water	0.089	0.104	0.117	0.128	0.169	0.117	8.258E+4
Blue	120	-1.75	Developed	0.108	0.120	0.126	0.133	0.155	0.128	6.185E+4
Blue	120	-1.75	Barren	0.123	0.145	0.164	0.181	0.240	0.163	1.573E+4
Blue	120	-1.75	Wetlands	0.103	0.113	0.119	0.125	0.136	0.118	5.953E+3
Blue	120	-1.75	ShrubScrub	0.111	0.123	0.128	0.135	0.151	0.128	1.014E+4
Blue	120	-1.75	Forest	0.099	0.111	0.117	0.123	0.137	0.113	4.968E+3
Blue	120	-1.75	All	0.107	0.120	0.127	0.134	0.148	0.126	5.857E+7
Blue	120	-1.25	Grassland	0.109	0.123	0.129	0.135	0.148	0.127	6.814E+7
Blue	120	-1.25	Cropland	0.105	0.121	0.128	0.136	0.154	0.127	1.674E+7
Blue	120	-1.25	PastureHay	0.099	0.112	0.119	0.126	0.145	0.120	1.131E+6
Blue	120	-1.25	Water	0.085	0.098	0.112	0.126	0.176	0.115	1.715E+5
Blue	120	-1.25	Developed	0.107	0.118	0.124	0.132	0.157	0.126	1.049E+5
Blue	120	-1.25	Barren	0.126	0.148	0.160	0.175	0.235	0.159	8.531E+4
Blue	120	-1.25	Wetlands	0.099	0.113	0.119	0.125	0.138	0.117	5.879E+3
Blue	120	-1.25	ShrubScrub	0.109	0.123	0.129	0.135	0.157	0.126	6.221E+4
Blue	120	-1.25	Forest	0.097	0.110	0.118	0.126	0.140	0.115	8.647E+3
Blue	120	-1.25	All	0.105	0.121	0.128	0.135	0.150	0.127	1.280E+8
Blue	120	-0.75	Grassland	0.109	0.123	0.130	0.138	0.151	0.128	1.147E+8
Blue	120	-0.75	Cropland	0.103	0.118	0.125	0.134	0.151	0.125	1.825E+7
Blue	120	-0.75	PastureHay	0.099	0.112	0.120	0.127	0.145	0.120	1.440E+6
Blue	120	-0.75	Water	0.085	0.105	0.118	0.131	0.177	0.117	2.612E+5
Blue	120	-0.75	Developed	0.105	0.117	0.125	0.134	0.157	0.127	1.534E+5
Blue	120	-0.75	Barren	0.117	0.140	0.155	0.172	0.235	0.161	9.125E+4
Blue	120	-0.75	Wetlands	0.100	0.112	0.120	0.127	0.141	0.119	1.383E+4
Blue	120	-0.75	ShrubScrub	0.111	0.124	0.131	0.138	0.156	0.128	5.802E+4
Blue	120	-0.75	Forest	0.098	0.111	0.119	0.128	0.145	0.116	9.894E+3
Blue	120	-0.75	All	0.106	0.121	0.128	0.136	0.151	0.127	1.919E+8
Blue	120	-0.25	Grassland	0.107	0.121	0.127	0.134	0.151	0.127	1.909E+8
Blue	120	-0.25	Cropland	0.101	0.118	0.126	0.135	0.153	0.125	2.857E+7
Blue	120	-0.25	PastureHay	0.097	0.111	0.118	0.127	0.146	0.121	1.664E+6
Blue	120	-0.25	Water	0.084	0.098	0.115	0.128	0.173	0.116	4.347E+5
Blue	120	-0.25	Developed	0.105	0.118	0.125	0.134	0.160	0.127	2.534E+5
Blue	120	-0.25	Barren	0.119	0.141	0.157	0.175	0.245	0.160	1.244E+5
Blue	120	-0.25	Wetlands	0.099	0.110	0.118	0.126	0.143	0.117	3.312E+4
Blue	120	-0.25	ShrubScrub	0.108	0.121	0.126	0.133	0.152	0.128	8.484E+4
Blue	120	-0.25	Forest	0.096	0.107	0.114	0.122	0.140	0.118	2.098E+4
Blue	120	-0.25	All	0.104	0.119	0.126	0.134	0.152	0.127	3.060E+8
Blue	120	0.25	Grassland	0.106	0.119	0.125	0.132	0.148	0.125	1.396E+8
Blue	120	0.25	Cropland	0.101	0.119	0.128	0.137	0.155	0.124	2.692E+7
Blue	120	0.25	PastureHay	0.101	0.113	0.120	0.128	0.146	0.118	1.603E+6
Blue	120	0.25	Water	0.083	0.101	0.116	0.128	0.180	0.117	3.186E+5
Blue	120	0.25	Developed	0.104	0.118	0.126	0.134	0.164	0.126	2.136E+5
Blue	120	0.25	Barren	0.118	0.142	0.159	0.179	0.254	0.163	1.153E+5
Blue	120	0.25	Wetlands	0.097	0.111	0.117	0.124	0.146	0.117	1.507E+4
Blue	120	0.25	ShrubScrub	0.106	0.118	0.124	0.131	0.153	0.125	5.271E+4
Blue	120	0.25	Forest	0.096	0.110	0.117	0.125	0.140	0.115	2.124E+4
Blue	120	0.25	All	0.103	0.118	0.125	0.132	0.150	0.124	2.370E+8
Blue	120	0.75	Grassland	0.104	0.116	0.121	0.128	0.143	0.121	9.287E+7
Blue	120	0.75	Cropland	0.098	0.113	0.121	0.129	0.147	0.122	1.757E+7
Blue	120	0.75	PastureHay	0.099	0.110	0.116	0.123	0.140	0.116	8.295E+5
Blue	120	0.75	Water	0.078	0.095	0.108	0.120	0.176	0.111	2.348E+5
Blue	120	0.75	Developed	0.102	0.113	0.119	0.128	0.158	0.122	1.478E+5
Blue	120	0.75	Barren	0.109	0.135	0.152	0.168	0.241	0.154	1.284E+5
Blue	120	0.75	Wetlands	0.097	0.108	0.114	0.120	0.135	0.112	1.658E+4
Blue	120	0.75	ShrubScrub	0.105	0.116	0.122	0.128	0.147	0.123	6.837E+4
Blue	120	0.75	Forest	0.097	0.105	0.111	0.118	0.132	0.112	1.558E+4
Blue	120	0.75	All	0.101	0.114	0.121	0.128	0.145	0.121	1.612E+8
Blue	120	1.25	Grassland	0.100	0.111	0.118	0.124	0.138	0.118	2.050E+8
Blue	120	1.25	Cropland	0.094	0.113	0.121	0.129	0.148	0.120	3.369E+7
Blue	120	1.25	PastureHay	0.095	0.108	0.116	0.123	0.139	0.114	1.940E+6
Blue	120	1.25	Water	0.081	0.092	0.107	0.120	0.159	0.107	5.416E+5
Blue	120	1.25	Developed	0.099	0.111	0.118	0.126	0.157	0.119	2.613E+5
Blue	120	1.25	Barren	0.107	0.133	0.151	0.169	0.238	0.157	1.435E+5
Blue	120	1.25	Wetlands	0.093	0.104	0.111	0.119	0.134	0.110	2.647E+4
Blue	120	1.25	ShrubScrub	0.100	0.112	0.118	0.125	0.144	0.119	1.214E+5
Blue	120	1.25	Forest	0.094	0.105	0.112	0.119	0.134	0.109	2.467E+4
Blue	120	1.25	All	0.097	0.111	0.118	0.125	0.142	0.118	3.410E+8
Blue	120	1.75	Grassland	0.098	0.110	0.117	0.126	0.143	0.118	1.152E+8
Blue	120	1.75	Cropland	0.093	0.112	0.121	0.131	0.153	0.120	1.718E+7
Blue	120	1.75	PastureHay	0.092	0.104	0.114	0.125	0.145	0.115	1.053E+6
Blue	120	1.75	Water	0.079	0.093	0.104	0.117	0.152	0.109	3.170E+5
Blue	120	1.75	Developed	0.095	0.110	0.118	0.131	0.162	0.123	1.760E+5
Blue	120	1.75	Barren	0.111	0.136	0.155	0.175	0.254	0.156	9.257E+4
Blue	120	1.75	Wetlands	0.088	0.101	0.108	0.116	0.131	0.109	1.931E+4
Blue	120	1.75	ShrubScrub	0.101	0.115	0.121	0.130	0.149	0.119	3.929E+4
Blue	120	1.75	Forest	0.091	0.104	0.110	0.118	0.131	0.111	1.208E+4
Blue	120	1.75	All	0.095	0.110	0.118	0.127	0.146	0.118	1.856E+8
Blue	120	All	Grassland	0.102	0.116	0.124	0.131	0.148	0.123	9.564E+8
Blue	120	All	Cropland	0.098	0.116	0.125	0.133	0.152	0.123	1.673E+8
Blue	120	All	PastureHay	0.097	0.110	0.118	0.126	0.144	0.118	1.033E+7
Blue	120	All	Water	0.081	0.097	0.111	0.125	0.170	0.113	2.362E+6
Blue	120	All	Developed	0.101	0.115	0.123	0.132	0.160	0.124	1.372E+6
Blue	120	All	Barren	0.113	0.139	0.156	0.174	0.244	0.159	7.965E+5
Blue	120	All	Wetlands	0.094	0.107	0.115	0.122	0.140	0.114	1.362E+5
Blue	120	All	ShrubScrub	0.104	0.117	0.124	0.132	0.151	0.124	4.970E+5
Blue	120	All	Forest	0.095	0.107	0.114	0.122	0.139	0.114	1.180E+5
Blue	120	All	All	0.099	0.115	0.123	0.131	0.149	0.123	1.609E+9
Blue	130	-1.75	Grassland	0.111	0.124	0.130	0.136	0.148	0.127	3.388E+7
Blue	130	-1.75	Cropland	0.107	0.121	0.128	0.135	0.150	0.125	8.916E+6
Blue	130	-1.75	PastureHay	0.100	0.113	0.120	0.127	0.142	0.118	7.300E+5
Blue	130	-1.75	Water	0.089	0.104	0.117	0.129	0.170	0.119	8.668E+4
Blue	130	-1.75	Developed	0.107	0.120	0.126	0.134	0.156	0.128	6.704E+4
Blue	130	-1.75	Barren	0.124	0.145	0.164	0.182	0.244	0.170	2.045E+4
Blue	130	-1.75	Wetlands	0.102	0.114	0.120	0.125	0.137	0.118	6.275E+3
Blue	130	-1.75	ShrubScrub	0.111	0.123	0.128	0.135	0.151	0.129	1.097E+4
Blue	130	-1.75	Forest	0.098	0.112	0.118	0.124	0.138	0.114	5.331E+3
Blue	130	-1.75	All	0.107	0.122	0.128	0.135	0.148	0.126	6.456E+7
Blue	130	-1.25	Grassland	0.106	0.120	0.127	0.134	0.149	0.125	1.108E+8
Blue	130	-1.25	Cropland	0.101	0.118	0.126	0.135	0.153	0.125	2.401E+7
Blue	130	-1.25	PastureHay	0.095	0.107	0.116	0.125	0.145	0.117	1.544E+6
Blue	130	-1.25	Water	0.084	0.099	0.114	0.127	0.178	0.115	2.874E+5
Blue	130	-1.25	Developed	0.104	0.116	0.123	0.131	0.158	0.125	1.645E+5
Blue	130	-1.25	Barren	0.121	0.146	0.159	0.175	0.236	0.164	1.188E+5
Blue	130	-1.25	Wetlands	0.093	0.107	0.114	0.122	0.137	0.115	1.206E+4
Blue	130	-1.25	ShrubScrub	0.103	0.119	0.127	0.134	0.155	0.126	9.067E+4
Blue	130	-1.25	Forest	0.090	0.103	0.112	0.121	0.138	0.111	1.479E+4
Blue	130	-1.25	All	0.102	0.118	0.126	0.134	0.150	0.125	1.998E+8
Blue	130	-0.75	Grassland	0.101	0.118	0.126	0.134	0.151	0.126	1.624E+8
Blue	130	-0.75	Cropland	0.096	0.114	0.123	0.132	0.150	0.123	2.679E+7
Blue	130	-0.75	PastureHay	0.093	0.107	0.117	0.126	0.145	0.117	2.020E+6
Blue	130	-0.75	Water	0.085	0.102	0.116	0.130	0.181	0.117	3.759E+5
Blue	130	-0.75	Developed	0.099	0.113	0.122	0.132	0.157	0.125	2.190E+5
Blue	130	-0.75	Barren	0.119	0.145	0.161	0.178	0.253	0.164	1.264E+5
Blue	130	-0.75	Wetlands	0.092	0.104	0.114	0.124	0.140	0.115	1.879E+4
Blue	130	-0.75	ShrubScrub	0.105	0.120	0.128	0.136	0.156	0.126	8.370E+4
Blue	130	-0.75	Forest	0.090	0.107	0.115	0.125	0.144	0.114	1.540E+4
Blue	130	-0.75	All	0.098	0.116	0.125	0.133	0.151	0.125	2.724E+8
Blue	130	-0.25	Grassland	0.102	0.117	0.125	0.132	0.151	0.125	2.042E+8
Blue	130	-0.25	Cropland	0.098	0.116	0.125	0.133	0.152	0.124	3.345E+7
Blue	130	-0.25	PastureHay	0.094	0.106	0.115	0.124	0.145	0.118	2.056E+6
Blue	130	-0.25	Water	0.084	0.099	0.113	0.126	0.170	0.115	5.028E+5
Blue	130	-0.25	Developed	0.101	0.115	0.123	0.132	0.160	0.125	2.974E+5
Blue	130	-0.25	Barren	0.118	0.143	0.159	0.176	0.239	0.161	1.414E+5
Blue	130	-0.25	Wetlands	0.093	0.107	0.115	0.124	0.143	0.114	3.277E+4
Blue	130	-0.25	ShrubScrub	0.103	0.117	0.125	0.133	0.153	0.126	8.762E+4
Blue	130	-0.25	Forest	0.090	0.104	0.112	0.120	0.139	0.114	2.130E+4
Blue	130	-0.25	All	0.099	0.115	0.124	0.132	0.151	0.124	3.353E+8
Blue	130	0.25	Grassland	0.103	0.117	0.123	0.131	0.148	0.123	1.412E+8
Blue	130	0.25	Cropland	0.099	0.118	0.127	0.136	0.155	0.124	2.835E+7
Blue	130	0.25	PastureHay	0.096	0.110	0.118	0.126	0.145	0.116	1.785E+6
Blue	130	0.25	Water	0.083	0.097	0.114	0.127	0.178	0.115	3.313E+5
Blue	130	0.25	Developed	0.103	0.116	0.124	0.133	0.164	0.125	2.203E+5
Blue	130	0.25	Barren	0.118	0.142	0.158	0.177	0.247	0.166	1.152E+5
Blue	130	0.25	Wetlands	0.092	0.107	0.115	0.122	0.146	0.115	1.599E+4
Blue	130	0.25	ShrubScrub	0.105	0.117	0.123	0.130	0.153	0.124	5.349E+4
Blue	130	0.25	Forest	0.094	0.108	0.115	0.123	0.140	0.114	2.075E+4
Blue	130	0.25	All	0.101	0.116	0.123	0.132	0.150	0.123	2.421E+8
Blue	130	0.75	Grassland	0.100	0.113	0.119	0.126	0.142	0.118	1.114E+8
Blue	130	0.75	Cropland	0.095	0.112	0.120	0.129	0.148	0.121	2.044E+7
Blue	130	0.75	PastureHay	0.093	0.107	0.113	0.121	0.140	0.114	1.003E+6
Blue	130	0.75	Water	0.078	0.095	0.108	0.120	0.173	0.110	2.729E+5
Blue	130	0.75	Developed	0.101	0.112	0.118	0.127	0.159	0.120	1.761E+5
Blue	130	0.75	Barren	0.109	0.135	0.153	0.168	0.231	0.153	1.500E+5
Blue	130	0.75	Wetlands	0.094	0.106	0.112	0.119	0.134	0.111	2.056E+4
Blue	130	0.75	ShrubScrub	0.103	0.115	0.121	0.128	0.149	0.122	7.686E+4
Blue	130	0.75	Forest	0.094	0.104	0.110	0.118	0.132	0.111	1.932E+4
Blue	130	0.75	All	0.097	0.112	0.119	0.126	0.144	0.119	1.921E+8
Blue	130	1.25	Grassland	0.095	0.109	0.116	0.123	0.138	0.116	2.376E+8
Blue	130	1.25	Cropland	0.089	0.111	0.120	0.129	0.148	0.119	3.793E+7
Blue	130	1.25	PastureHay	0.091	0.106	0.114	0.122	0.139	0.112	2.205E+6
Blue	130	1.25	Water	0.079	0.091	0.104	0.118	0.159	0.107	6.258E+5
Blue	130	1.25	Developed	0.095	0.110	0.117	0.126	0.158	0.119	3.057E+5
Blue	130	1.25	Barren	0.104	0.131	0.148	0.167	0.238	0.156	1.718E+5
Blue	130	1.25	Wetlands	0.088	0.100	0.107	0.116	0.133	0.108	3.098E+4
Blue	130	1.25	ShrubScrub	0.098	0.110	0.116	0.123	0.144	0.118	1.410E+5
Blue	130	1.25	Forest	0.089	0.102	0.109	0.116	0.133	0.107	2.743E+4
Blue	130	1.25	All	0.092	0.108	0.116	0.123	0.142	0.117	3.929E+8
Blue	130	1.75	Grassland	0.097	0.110	0.117	0.125	0.143	0.115	1.256E+8
Blue	130	1.75	Cropland	0.091	0.111	0.121	0.131	0.153	0.118	1.885E+7
Blue	130	1.75	PastureHay	0.091	0.104	0.113	0.125	0.145	0.111	1.217E+6
Blue	130	1.75	Water	0.079	0.093	0.104	0.117	0.157	0.109	3.389E+5
Blue	130	1.75	Developed	0.095	0.109	0.118	0.131	0.161	0.121	1.921E+5
Blue	130	1.75	Barren	0.110	0.136	0.155	0.176	0.253	0.159	9.685E+4
Blue	130	1.75	Wetlands	0.090	0.100	0.107	0.116	0.131	0.107	2.226E+4
Blue	130	1.75	ShrubScrub	0.100	0.115	0.121	0.129	0.149	0.117	4.202E+4
Blue	130	1.75	Forest	0.091	0.103	0.110	0.118	0.131	0.109	1.241E+4
Blue	130	1.75	All	0.094	0.109	0.117	0.126	0.146	0.115	2.023E+8
Blue	130	All	Grassland	0.099	0.114	0.122	0.130	0.148	0.121	1.127E+9
Blue	130	All	Cropland	0.095	0.114	0.123	0.132	0.152	0.122	1.987E+8
Blue	130	All	PastureHay	0.094	0.107	0.116	0.125	0.144	0.115	1.256E+7
Blue	130	All	Water	0.081	0.096	0.110	0.124	0.171	0.112	2.822E+6
Blue	130	All	Developed	0.099	0.113	0.121	0.131	0.160	0.123	1.642E+6
Blue	130	All	Barren	0.113	0.140	0.156	0.174	0.243	0.160	9.409E+5
Blue	130	All	Wetlands	0.091	0.104	0.112	0.121	0.139	0.112	1.597E+5
Blue	130	All	ShrubScrub	0.101	0.115	0.123	0.131	0.152	0.123	5.863E+5
Blue	130	All	Forest	0.091	0.104	0.112	0.120	0.138	0.111	1.367E+5
Blue	130	All	All	0.097	0.113	0.121	0.130	0.149	0.121	1.902E+9
Blue	140	-1.75	Grassland	0.109	0.122	0.129	0.138	0.154	0.125	4.191E+7
Blue	140	-1.75	Cropland	0.104	0.119	0.126	0.134	0.151	0.123	8.947E+6
Blue	140	-1.75	PastureHay	0.099	0.110	0.117	0.124	0.141	0.115	8.401E+5
Blue	140	-1.75	Water	0.087	0.102	0.116	0.129	0.163	0.117	1.140E+5
Blue	140	-1.75	Developed	0.106	0.118	0.125	0.134	0.158	0.126	7.821E+4
Blue	140	-1.75	Barren	0.129	0.155	0.170	0.184	0.242	0.175	2.369E+4
Blue	140	-1.75	Wetlands	0.099	0.113	0.119	0.125	0.138	0.114	6.365E+3
Blue	140	-1.75	ShrubScrub	0.111	0.123	0.130	0.137	0.153	0.127	1.305E+4
Blue	140	-1.75	Forest	0.095	0.108	0.115	0.123	0.137	0.111	3.845E+3
Blue	140	-1.75	All	0.105	0.120	0.127	0.135	0.154	0.123	7.506E+7
Blue	140	-1.25	Grassland	0.104	0.117	0.125	0.132	0.147	0.122	1.045E+8
Blue	140	-1.25	Cropland	0.098	0.116	0.125	0.135	0.154	0.123	1.993E+7
Blue	140	-1.25	PastureHay	0.094	0.104	0.112	0.123	0.147	0.114	1.145E+6
Blue	140	-1.25	Water	0.083	0.103	0.116	0.128	0.187	0.116	2.595E+5
Blue	140	-1.25	Developed	0.102	0.114	0.121	0.130	0.159	0.123	1.445E+5
Blue	140	-1.25	Barren	0.121	0.145	0.159	0.177	0.242	0.166	1.324E+5
Blue	140	-1.25	Wetlands	0.090	0.103	0.109	0.117	0.134	0.111	1.390E+4
Blue	140	-1.25	ShrubScrub	0.101	0.117	0.126	0.133	0.155	0.124	9.367E+4
Blue	140	-1.25	Forest	0.089	0.101	0.110	0.119	0.137	0.108	1.837E+4
Blue	140	-1.25	All	0.100	0.116	0.124	0.132	0.149	0.122	1.834E+8
Blue	140	-0.75	Grassland	0.101	0.114	0.120	0.127	0.146	0.121	1.133E+8
Blue	140	-0.75	Cropland	0.096	0.111	0.120	0.129	0.148	0.122	2.096E+7
Blue	140	-0.75	PastureHay	0.092	0.105	0.113	0.124	0.142	0.114	1.638E+6
Blue	140	-0.75	Water	0.085	0.100	0.112	0.123	0.178	0.113	2.753E+5
Blue	140	-0.75	Developed	0.098	0.112	0.119	0.128	0.156	0.123	1.689E+5
Blue	140	-0.75	Barren	0.119	0.146	0.161	0.177	0.245	0.165	8.680E+4
Blue	140	-0.75	Wetlands	0.091	0.101	0.108	0.117	0.135	0.111	1.343E+4
Blue	140	-0.75	ShrubScrub	0.105	0.114	0.123	0.134	0.154	0.123	5.785E+4
Blue	140	-0.75	Forest	0.090	0.099	0.107	0.116	0.142	0.110	1.095E+4
Blue	140	-0.75	All	0.098	0.112	0.119	0.127	0.147	0.121	1.953E+8
Blue	140	-0.25	Grassland	0.100	0.114	0.121	0.128	0.149	0.119	1.608E+8
Blue	140	-0.25	Cropland	0.095	0.113	0.123	0.132	0.152	0.120	2.916E+7
Blue	140	-0.25	PastureHay	0.092	0.104	0.112	0.121	0.144	0.111	1.741E+6
Blue	140	-0.25	Water	0.082	0.097	0.110	0.124	0.168	0.112	4.371E+5
Blue	140	-0.25	Developed	0.098	0.112	0.120	0.129	0.161	0.119	2.576E+5
Blue	140	-0.25	Barren	0.118	0.143	0.159	0.177	0.257	0.163	1.094E+5
Blue	140	-0.25	Wetlands	0.091	0.104	0.110	0.119	0.138	0.111	2.389E+4
Blue	140	-0.25	ShrubScrub	0.101	0.114	0.121	0.130	0.153	0.121	5.909E+4
Blue	140	-0.25	Forest	0.088	0.101	0.109	0.116	0.133	0.108	1.850E+4
Blue	140	-0.25	All	0.097	0.113	0.120	0.128	0.150	0.118	2.704E+8
Blue	140	0.25	Grassland	0.093	0.110	0.117	0.125	0.145	0.117	1.266E+8
Blue	140	0.25	Cropland	0.086	0.110	0.122	0.133	0.153	0.120	2.350E+7
Blue	140	0.25	PastureHay	0.086	0.102	0.111	0.121	0.143	0.111	1.508E+6
Blue	140	0.25	Water	0.082	0.095	0.108	0.124	0.176	0.109	2.963E+5
Blue	140	0.25	Developed	0.094	0.111	0.119	0.129	0.161	0.121	1.841E+5
Blue	140	0.25	Barren	0.109	0.137	0.155	0.177	0.247	0.162	8.712E+4
Blue	140	0.25	Wetlands	0.083	0.095	0.104	0.114	0.134	0.108	1.846E+4
Blue	140	0.25	ShrubScrub	0.094	0.109	0.118	0.126	0.151	0.120	5.348E+4
Blue	140	0.25	Forest	0.086	0.099	0.109	0.116	0.135	0.108	1.522E+4
Blue	140	0.25	All	0.089	0.108	0.117	0.126	0.148	0.118	2.127E+8
Blue	140	0.75	Grassland	0.093	0.107	0.114	0.121	0.138	0.114	9.482E+7
Blue	140	0.75	Cropland	0.090	0.111	0.121	0.131	0.149	0.119	1.602E+7
Blue	140	0.75	PastureHay	0.088	0.103	0.110	0.117	0.137	0.111	8.251E+5
Blue	140	0.75	Water	0.076	0.089	0.105	0.118	0.169	0.108	2.259E+5
Blue	140	0.75	Developed	0.096	0.109	0.115	0.123	0.157	0.118	1.368E+5
Blue	140	0.75	Barren	0.098	0.122	0.142	0.164	0.230	0.148	1.555E+5
Blue	140	0.75	Wetlands	0.090	0.103	0.109	0.114	0.131	0.106	1.550E+4
Blue	140	0.75	ShrubScrub	0.092	0.109	0.117	0.124	0.148	0.117	7.657E+4
Blue	140	0.75	Forest	0.088	0.101	0.107	0.114	0.129	0.106	1.779E+4
Blue	140	0.75	All	0.091	0.107	0.114	0.122	0.143	0.115	1.626E+8
Blue	140	1.25	Grassland	0.090	0.105	0.113	0.119	0.135	0.112	2.307E+8
Blue	140	1.25	Cropland	0.086	0.108	0.119	0.128	0.148	0.118	3.655E+7
Blue	140	1.25	PastureHay	0.087	0.103	0.112	0.121	0.139	0.108	2.061E+6
Blue	140	1.25	Water	0.079	0.092	0.105	0.118	0.166	0.106	5.814E+5
Blue	140	1.25	Developed	0.091	0.108	0.116	0.124	0.158	0.116	2.893E+5
Blue	140	1.25	Barren	0.098	0.126	0.143	0.163	0.237	0.149	1.824E+5
Blue	140	1.25	Wetlands	0.085	0.096	0.104	0.112	0.130	0.103	2.947E+4
Blue	140	1.25	ShrubScrub	0.091	0.105	0.113	0.120	0.142	0.112	1.467E+5
Blue	140	1.25	Forest	0.084	0.096	0.103	0.111	0.130	0.103	2.830E+4
Blue	140	1.25	All	0.088	0.104	0.113	0.120	0.140	0.113	3.817E+8
Blue	140	1.75	Grassland	0.091	0.105	0.113	0.120	0.137	0.111	1.458E+8
Blue	140	1.75	Cropland	0.087	0.107	0.117	0.127	0.148	0.116	2.348E+7
Blue	140	1.75	PastureHay	0.085	0.099	0.107	0.116	0.138	0.108	1.554E+6
Blue	140	1.75	Water	0.079	0.089	0.102	0.116	0.156	0.107	3.982E+5
Blue	140	1.75	Developed	0.090	0.104	0.113	0.124	0.156	0.117	2.193E+5
Blue	140	1.75	Barren	0.104	0.132	0.151	0.172	0.258	0.155	1.159E+5
Blue	140	1.75	Wetlands	0.085	0.098	0.105	0.113	0.129	0.103	2.552E+4
Blue	140	1.75	ShrubScrub	0.093	0.109	0.116	0.123	0.145	0.113	5.587E+4
Blue	140	1.75	Forest	0.083	0.100	0.107	0.115	0.129	0.104	1.328E+4
Blue	140	1.75	All	0.088	0.104	0.113	0.121	0.141	0.112	2.389E+8
Blue	140	All	Grassland	0.093	0.110	0.117	0.125	0.145	0.116	1.018E+9
Blue	140	All	Cropland	0.089	0.111	0.121	0.131	0.151	0.120	1.786E+8
Blue	140	All	PastureHay	0.087	0.103	0.111	0.121	0.142	0.111	1.131E+7
Blue	140	All	Water	0.080	0.095	0.108	0.122	0.171	0.110	2.588E+6
Blue	140	All	Developed	0.094	0.110	0.118	0.127	0.159	0.120	1.479E+6
Blue	140	All	Barren	0.105	0.136	0.154	0.174	0.245	0.157	8.932E+5
Blue	140	All	Wetlands	0.086	0.100	0.107	0.116	0.134	0.107	1.465E+5
Blue	140	All	ShrubScrub	0.094	0.111	0.119	0.128	0.151	0.118	5.562E+5
Blue	140	All	Forest	0.086	0.099	0.107	0.115	0.134	0.106	1.263E+5
Blue	140	All	All	0.091	0.109	0.117	0.126	0.147	0.117	1.720E+9
Blue	150	-1.75	Grassland	0.108	0.124	0.131	0.139	0.154	0.125	4.692E+7
Blue	150	-1.75	Cropland	0.103	0.119	0.127	0.135	0.152	0.124	9.780E+6
Blue	150	-1.75	PastureHay	0.099	0.111	0.118	0.126	0.142	0.118	9.523E+5
Blue	150	-1.75	Water	0.087	0.102	0.113	0.128	0.157	0.115	1.372E+5
Blue	150	-1.75	Developed	0.107	0.119	0.126	0.135	0.161	0.126	8.395E+4
Blue	150	-1.75	Barren	0.132	0.156	0.169	0.186	0.259	0.179	3.641E+4
Blue	150	-1.75	Wetlands	0.098	0.114	0.121	0.126	0.140	0.113	4.968E+3
Blue	150	-1.75	ShrubScrub	0.112	0.126	0.132	0.140	0.158	0.126	2.228E+4
Blue	150	-1.75	Forest	0.092	0.104	0.114	0.123	0.138	0.110	1.714E+3
Blue	150	-1.75	All	0.105	0.121	0.129	0.137	0.154	0.124	8.446E+7
Blue	150	-1.25	Grassland	0.102	0.115	0.122	0.130	0.146	0.121	1.099E+8
Blue	150	-1.25	Cropland	0.096	0.114	0.123	0.133	0.153	0.122	2.217E+7
Blue	150	-1.25	PastureHay	0.093	0.104	0.112	0.122	0.145	0.112	1.338E+6
Blue	150	-1.25	Water	0.083	0.102	0.115	0.128	0.192	0.114	2.739E+5
Blue	150	-1.25	Developed	0.101	0.114	0.121	0.130	0.158	0.123	1.644E+5
Blue	150	-1.25	Barren	0.118	0.144	0.159	0.177	0.247	0.165	1.199E+5
Blue	150	-1.25	Wetlands	0.090	0.102	0.108	0.116	0.133	0.110	1.556E+4
Blue	150	-1.25	ShrubScrub	0.100	0.116	0.123	0.131	0.152	0.122	8.719E+4
Blue	150	-1.25	Forest	0.087	0.099	0.107	0.115	0.135	0.107	1.903E+4
Blue	150	-1.25	All	0.099	0.114	0.122	0.130	0.148	0.121	1.945E+8
Blue	150	-0.75	Grassland	0.093	0.110	0.118	0.126	0.143	0.117	1.152E+8
Blue	150	-0.75	Cropland	0.084	0.104	0.115	0.126	0.147	0.118	2.215E+7
Blue	150	-0.75	PastureHay	0.080	0.095	0.105	0.115	0.136	0.110	1.525E+6
Blue	150	-0.75	Water	0.081	0.096	0.108	0.123	0.182	0.111	2.934E+5
Blue	150	-0.75	Developed	0.088	0.107	0.115	0.125	0.158	0.121	1.702E+5
Blue	150	-0.75	Barren	0.116	0.144	0.162	0.179	0.244	0.161	1.069E+5
Blue	150	-0.75	Wetlands	0.086	0.098	0.103	0.111	0.131	0.105	1.528E+4
Blue	150	-0.75	ShrubScrub	0.099	0.115	0.122	0.130	0.157	0.118	6.196E+4
Blue	150	-0.75	Forest	0.086	0.099	0.108	0.117	0.141	0.106	1.281E+4
Blue	150	-0.75	All	0.088	0.108	0.117	0.125	0.145	0.117	1.980E+8
Blue	150	-0.25	Grassland	0.095	0.111	0.118	0.125	0.147	0.114	1.259E+8
Blue	150	-0.25	Cropland	0.089	0.110	0.120	0.130	0.151	0.115	2.238E+7
Blue	150	-0.25	PastureHay	0.085	0.099	0.107	0.116	0.140	0.105	1.375E+6
Blue	150	-0.25	Water	0.083	0.098	0.110	0.123	0.170	0.109	3.524E+5
Blue	150	-0.25	Developed	0.094	0.110	0.117	0.127	0.160	0.116	1.995E+5
Blue	150	-0.25	Barren	0.113	0.138	0.154	0.173	0.242	0.154	1.072E+5
Blue	150	-0.25	Wetlands	0.086	0.100	0.106	0.113	0.136	0.105	1.786E+4
Blue	150	-0.25	ShrubScrub	0.095	0.110	0.118	0.125	0.151	0.116	7.199E+4
Blue	150	-0.25	Forest	0.086	0.098	0.105	0.113	0.131	0.103	1.731E+4
Blue	150	-0.25	All	0.091	0.109	0.117	0.125	0.148	0.114	2.147E+8
Blue	150	0.25	Grassland	0.089	0.103	0.113	0.122	0.143	0.113	1.123E+8
Blue	150	0.25	Cropland	0.083	0.104	0.118	0.130	0.152	0.116	1.843E+7
Blue	150	0.25	PastureHay	0.084	0.098	0.108	0.119	0.142	0.106	1.197E+6
Blue	150	0.25	Water	0.081	0.091	0.103	0.119	0.171	0.105	2.885E+5
Blue	150	0.25	Developed	0.090	0.108	0.116	0.126	0.159	0.116	1.644E+5
Blue	150	0.25	Barren	0.105	0.134	0.153	0.175	0.242	0.153	1.025E+5
Blue	150	0.25	Wetlands	0.083	0.093	0.101	0.111	0.128	0.103	1.878E+4
Blue	150	0.25	ShrubScrub	0.091	0.105	0.113	0.123	0.148	0.116	6.808E+4
Blue	150	0.25	Forest	0.083	0.094	0.103	0.113	0.131	0.102	1.463E+4
Blue	150	0.25	All	0.086	0.103	0.113	0.122	0.146	0.113	1.878E+8
Blue	150	0.75	Grassland	0.089	0.101	0.109	0.117	0.134	0.108	1.096E+8
Blue	150	0.75	Cropland	0.085	0.103	0.116	0.127	0.148	0.112	1.909E+7
Blue	150	0.75	PastureHay	0.085	0.096	0.106	0.115	0.135	0.103	1.107E+6
Blue	150	0.75	Water	0.077	0.090	0.102	0.117	0.160	0.109	2.484E+5
Blue	150	0.75	Developed	0.089	0.104	0.112	0.120	0.152	0.113	1.408E+5
Blue	150	0.75	Barren	0.098	0.124	0.142	0.163	0.241	0.148	1.587E+5
Blue	150	0.75	Wetlands	0.082	0.090	0.099	0.108	0.126	0.102	1.123E+4
Blue	150	0.75	ShrubScrub	0.090	0.103	0.113	0.122	0.144	0.109	8.917E+4
Blue	150	0.75	Forest	0.082	0.096	0.103	0.110	0.128	0.101	1.614E+4
Blue	150	0.75	All	0.087	0.100	0.109	0.119	0.140	0.108	1.886E+8
Blue	150	1.25	Grassland	0.086	0.100	0.108	0.115	0.132	0.107	2.169E+8
Blue	150	1.25	Cropland	0.083	0.103	0.117	0.128	0.149	0.114	3.144E+7
Blue	150	1.25	PastureHay	0.086	0.098	0.104	0.113	0.136	0.104	1.767E+6
Blue	150	1.25	Water	0.078	0.093	0.105	0.117	0.159	0.107	5.234E+5
Blue	150	1.25	Developed	0.089	0.103	0.111	0.121	0.156	0.112	2.595E+5
Blue	150	1.25	Barren	0.097	0.126	0.142	0.162	0.237	0.145	1.738E+5
Blue	150	1.25	Wetlands	0.080	0.091	0.098	0.106	0.124	0.099	2.905E+4
Blue	150	1.25	ShrubScrub	0.090	0.103	0.110	0.117	0.139	0.109	1.296E+5
Blue	150	1.25	Forest	0.081	0.091	0.098	0.105	0.124	0.099	2.659E+4
Blue	150	1.25	All	0.085	0.100	0.108	0.117	0.140	0.108	3.511E+8
Blue	150	1.75	Grassland	0.089	0.099	0.105	0.113	0.130	0.105	9.615E+7
Blue	150	1.75	Cropland	0.085	0.100	0.112	0.123	0.145	0.111	1.725E+7
Blue	150	1.75	PastureHay	0.083	0.094	0.102	0.111	0.135	0.102	1.185E+6
Blue	150	1.75	Water	0.076	0.089	0.103	0.117	0.150	0.105	2.957E+5
Blue	150	1.75	Developed	0.088	0.099	0.107	0.116	0.152	0.112	1.628E+5
Blue	150	1.75	Barren	0.102	0.127	0.142	0.165	0.233	0.147	6.255E+4
Blue	150	1.75	Wetlands	0.085	0.094	0.099	0.107	0.124	0.099	1.807E+4
Blue	150	1.75	ShrubScrub	0.091	0.102	0.110	0.118	0.138	0.107	3.485E+4
Blue	150	1.75	Forest	0.083	0.095	0.100	0.106	0.121	0.097	8.269E+3
Blue	150	1.75	All	0.087	0.098	0.105	0.114	0.136	0.106	1.613E+8
Blue	150	All	Grassland	0.089	0.104	0.113	0.122	0.144	0.112	9.329E+8
Blue	150	All	Cropland	0.085	0.106	0.118	0.129	0.150	0.116	1.627E+8
Blue	150	All	PastureHay	0.083	0.098	0.107	0.117	0.139	0.107	1.044E+7
Blue	150	All	Water	0.079	0.094	0.106	0.121	0.170	0.109	2.413E+6
Blue	150	All	Developed	0.090	0.106	0.115	0.125	0.158	0.116	1.345E+6
Blue	150	All	Barren	0.103	0.133	0.151	0.172	0.241	0.154	8.679E+5
Blue	150	All	Wetlands	0.083	0.095	0.102	0.111	0.131	0.103	1.308E+5
Blue	150	All	ShrubScrub	0.092	0.107	0.116	0.125	0.149	0.114	5.651E+5
Blue	150	All	Forest	0.083	0.095	0.103	0.111	0.131	0.102	1.165E+5
Blue	150	All	All	0.087	0.103	0.113	0.123	0.145	0.113	1.580E+9
Blue	160	-1.75	Grassland	0.108	0.122	0.129	0.137	0.153	0.126	5.702E+7
Blue	160	-1.75	Cropland	0.098	0.114	0.122	0.130	0.149	0.123	9.549E+6
Blue	160	-1.75	PastureHay	0.095	0.106	0.114	0.122	0.139	0.116	8.223E+5
Blue	160	-1.75	Water	0.086	0.100	0.112	0.127	0.157	0.118	1.623E+5
Blue	160	-1.75	Developed	0.102	0.117	0.125	0.137	0.159	0.127	8.884E+4
Blue	160	-1.75	Barren	0.128	0.154	0.169	0.190	0.272	0.175	5.420E+4
Blue	160	-1.75	Wetlands	0.092	0.106	0.113	0.122	0.135	0.111	8.443E+3
Blue	160	-1.75	ShrubScrub	0.106	0.121	0.128	0.136	0.157	0.125	3.495E+4
Blue	160	-1.75	Forest	0.089	0.101	0.107	0.117	0.131	0.109	3.858E+3
Blue	160	-1.75	All	0.102	0.119	0.127	0.135	0.153	0.125	9.738E+7
Blue	160	-1.25	Grassland	0.099	0.116	0.123	0.130	0.146	0.119	1.154E+8
Blue	160	-1.25	Cropland	0.089	0.109	0.119	0.128	0.149	0.117	2.096E+7
Blue	160	-1.25	PastureHay	0.089	0.103	0.114	0.123	0.142	0.109	1.162E+6
Blue	160	-1.25	Water	0.084	0.103	0.117	0.130	0.194	0.113	2.652E+5
Blue	160	-1.25	Developed	0.099	0.116	0.123	0.130	0.156	0.122	1.626E+5
Blue	160	-1.25	Barren	0.120	0.146	0.162	0.182	0.254	0.164	1.247E+5
Blue	160	-1.25	Wetlands	0.089	0.101	0.107	0.115	0.134	0.108	1.563E+4
Blue	160	-1.25	ShrubScrub	0.102	0.116	0.122	0.130	0.152	0.122	7.553E+4
Blue	160	-1.25	Forest	0.088	0.100	0.107	0.115	0.131	0.104	2.256E+4
Blue	160	-1.25	All	0.094	0.113	0.122	0.130	0.148	0.118	1.966E+8
Blue	160	-0.75	Grassland	0.092	0.108	0.115	0.123	0.141	0.114	1.055E+8
Blue	160	-0.75	Cropland	0.084	0.100	0.111	0.123	0.145	0.115	1.968E+7
Blue	160	-0.75	PastureHay	0.080	0.090	0.099	0.107	0.127	0.106	1.239E+6
Blue	160	-0.75	Water	0.082	0.097	0.108	0.122	0.183	0.109	2.903E+5
Blue	160	-0.75	Developed	0.088	0.106	0.113	0.123	0.158	0.118	1.565E+5
Blue	160	-0.75	Barren	0.115	0.144	0.161	0.179	0.241	0.158	9.352E+4
Blue	160	-0.75	Wetlands	0.085	0.096	0.101	0.107	0.128	0.103	1.255E+4
Blue	160	-0.75	ShrubScrub	0.096	0.113	0.121	0.130	0.158	0.114	6.413E+4
Blue	160	-0.75	Forest	0.086	0.097	0.104	0.112	0.132	0.102	1.178E+4
Blue	160	-0.75	All	0.087	0.106	0.114	0.123	0.143	0.114	1.805E+8
Blue	160	-0.25	Grassland	0.091	0.106	0.113	0.123	0.147	0.110	1.068E+8
Blue	160	-0.25	Cropland	0.086	0.100	0.113	0.125	0.151	0.111	2.053E+7
Blue	160	-0.25	PastureHay	0.084	0.093	0.100	0.109	0.139	0.102	1.357E+6
Blue	160	-0.25	Water	0.078	0.098	0.110	0.123	0.168	0.107	2.740E+5
Blue	160	-0.25	Developed	0.090	0.104	0.113	0.124	0.159	0.113	1.632E+5
Blue	160	-0.25	Barren	0.109	0.136	0.151	0.169	0.223	0.151	1.240E+5
Blue	160	-0.25	Wetlands	0.083	0.092	0.099	0.108	0.129	0.100	1.228E+4
Blue	160	-0.25	ShrubScrub	0.092	0.106	0.115	0.130	0.156	0.112	9.296E+4
Blue	160	-0.25	Forest	0.083	0.093	0.101	0.113	0.134	0.101	1.240E+4
Blue	160	-0.25	All	0.088	0.103	0.112	0.123	0.149	0.110	1.901E+8
Blue	160	0.25	Grassland	0.087	0.099	0.105	0.112	0.132	0.108	1.074E+8
Blue	160	0.25	Cropland	0.083	0.096	0.108	0.121	0.146	0.110	1.800E+7
Blue	160	0.25	PastureHay	0.083	0.093	0.100	0.108	0.128	0.101	1.032E+6
Blue	160	0.25	Water	0.080	0.091	0.101	0.115	0.175	0.106	2.899E+5
Blue	160	0.25	Developed	0.087	0.101	0.110	0.120	0.156	0.113	1.648E+5
Blue	160	0.25	Barren	0.102	0.133	0.154	0.177	0.253	0.157	9.012E+4
Blue	160	0.25	Wetlands	0.081	0.090	0.095	0.102	0.119	0.097	1.630E+4
Blue	160	0.25	ShrubScrub	0.088	0.101	0.107	0.114	0.140	0.111	5.853E+4
Blue	160	0.25	Forest	0.080	0.090	0.096	0.101	0.117	0.097	1.392E+4
Blue	160	0.25	All	0.085	0.097	0.105	0.113	0.137	0.108	1.794E+8
Blue	160	0.75	Grassland	0.087	0.097	0.103	0.110	0.130	0.104	1.245E+8
Blue	160	0.75	Cropland	0.084	0.095	0.106	0.120	0.144	0.109	2.503E+7
Blue	160	0.75	PastureHay	0.084	0.090	0.097	0.106	0.133	0.099	1.599E+6
Blue	160	0.75	Water	0.077	0.088	0.097	0.112	0.155	0.102	3.034E+5
Blue	160	0.75	Developed	0.088	0.101	0.109	0.119	0.160	0.111	1.887E+5
Blue	160	0.75	Barren	0.097	0.122	0.141	0.164	0.229	0.152	1.356E+5
Blue	160	0.75	Wetlands	0.079	0.090	0.095	0.103	0.121	0.096	1.554E+4
Blue	160	0.75	ShrubScrub	0.089	0.099	0.106	0.115	0.141	0.106	8.388E+4
Blue	160	0.75	Forest	0.080	0.090	0.097	0.105	0.121	0.096	1.435E+4
Blue	160	0.75	All	0.086	0.096	0.103	0.111	0.137	0.105	2.199E+8
Blue	160	1.25	Grassland	0.086	0.096	0.102	0.109	0.128	0.103	1.474E+8
Blue	160	1.25	Cropland	0.083	0.096	0.111	0.125	0.148	0.109	2.176E+7
Blue	160	1.25	PastureHay	0.084	0.094	0.100	0.109	0.136	0.100	1.179E+6
Blue	160	1.25	Water	0.078	0.088	0.098	0.111	0.150	0.103	3.566E+5
Blue	160	1.25	Developed	0.087	0.100	0.107	0.117	0.151	0.110	1.799E+5
Blue	160	1.25	Barren	0.098	0.126	0.146	0.155	0.221	0.146	1.535E+5
Blue	160	1.25	Wetlands	0.080	0.087	0.091	0.098	0.115	0.094	2.049E+4
Blue	160	1.25	ShrubScrub	0.089	0.097	0.104	0.112	0.138	0.105	1.046E+5
Blue	160	1.25	Forest	0.080	0.090	0.095	0.101	0.118	0.096	1.951E+4
Blue	160	1.25	All	0.084	0.095	0.102	0.111	0.139	0.103	2.420E+8
Blue	160	1.75	Grassland	0.088	0.098	0.104	0.112	0.128	0.104	8.991E+7
Blue	160	1.75	Cropland	0.085	0.100	0.113	0.123	0.144	0.112	1.653E+7
Blue	160	1.75	PastureHay	0.083	0.091	0.099	0.108	0.134	0.100	1.091E+6
Blue	160	1.75	Water	0.078	0.087	0.098	0.111	0.148	0.103	2.817E+5
Blue	160	1.75	Developed	0.087	0.099	0.107	0.116	0.154	0.111	1.503E+5
Blue	160	1.75	Barren	0.100	0.130	0.153	0.179	0.244	0.147	6.592E+4
Blue	160	1.75	Wetlands	0.083	0.092	0.097	0.104	0.121	0.096	1.311E+4
Blue	160	1.75	ShrubScrub	0.089	0.098	0.104	0.113	0.137	0.105	3.567E+4
Blue	160	1.75	Forest	0.081	0.092	0.098	0.104	0.121	0.095	8.265E+3
Blue	160	1.75	All	0.086	0.097	0.104	0.113	0.136	0.105	1.521E+8
Blue	160	All	Grassland	0.088	0.100	0.108	0.118	0.142	0.110	8.539E+8
Blue	160	All	Cropland	0.084	0.099	0.112	0.124	0.147	0.112	1.520E+8
Blue	160	All	PastureHay	0.083	0.093	0.101	0.111	0.136	0.103	9.481E+6
Blue	160	All	Water	0.078	0.091	0.103	0.117	0.171	0.107	2.223E+6
Blue	160	All	Developed	0.089	0.103	0.112	0.123	0.157	0.115	1.255E+6
Blue	160	All	Barren	0.102	0.133	0.152	0.172	0.242	0.155	8.415E+5
Blue	160	All	Wetlands	0.081	0.091	0.097	0.105	0.127	0.100	1.143E+5
Blue	160	All	ShrubScrub	0.090	0.102	0.111	0.122	0.151	0.112	5.503E+5
Blue	160	All	Forest	0.081	0.092	0.099	0.107	0.128	0.099	1.066E+5
Blue	160	All	All	0.086	0.099	0.108	0.119	0.144	0.110	1.458E+9
Blue	170	-1.75	Grassland	0.108	0.123	0.131	0.139	0.153	0.125	9.797E+7
Blue	170	-1.75	Cropland	0.097	0.115	0.125	0.134	0.152	0.122	1.714E+7
Blue	170	-1.75	PastureHay	0.096	0.108	0.115	0.122	0.141	0.119	1.270E+6
Blue	170	-1.75	Water	0.085	0.101	0.116	0.134	0.196	0.122	2.872E+5
Blue	170	-1.75	Developed	0.104	0.121	0.130	0.137	0.165	0.127	1.548E+5
Blue	170	-1.75	Barren	0.123	0.153	0.167	0.188	0.277	0.180	9.721E+4
Blue	170	-1.75	Wetlands	0.090	0.104	0.110	0.119	0.136	0.109	1.499E+4
Blue	170	-1.75	ShrubScrub	0.105	0.120	0.129	0.138	0.159	0.125	6.111E+4
Blue	170	-1.75	Forest	0.092	0.106	0.114	0.123	0.140	0.108	9.487E+3
Blue	170	-1.75	All	0.102	0.121	0.129	0.137	0.154	0.124	1.682E+8
Blue	170	-1.25	Grassland	0.098	0.114	0.121	0.129	0.145	0.119	9.763E+7
Blue	170	-1.25	Cropland	0.089	0.105	0.116	0.126	0.148	0.115	1.957E+7
Blue	170	-1.25	PastureHay	0.089	0.102	0.109	0.117	0.134	0.109	1.198E+6
Blue	170	-1.25	Water	0.082	0.102	0.116	0.129	0.192	0.115	2.103E+5
Blue	170	-1.25	Developed	0.097	0.114	0.122	0.130	0.158	0.121	1.412E+5
Blue	170	-1.25	Barren	0.119	0.149	0.165	0.186	0.267	0.169	1.093E+5
Blue	170	-1.25	Wetlands	0.089	0.099	0.105	0.112	0.131	0.104	1.280E+4
Blue	170	-1.25	ShrubScrub	0.101	0.114	0.121	0.129	0.153	0.121	7.154E+4
Blue	170	-1.25	Forest	0.088	0.100	0.107	0.115	0.131	0.106	1.997E+4
Blue	170	-1.25	All	0.093	0.112	0.120	0.128	0.146	0.118	1.716E+8
Blue	170	-0.75	Grassland	0.093	0.110	0.116	0.124	0.141	0.113	9.271E+7
Blue	170	-0.75	Cropland	0.084	0.100	0.111	0.123	0.145	0.113	1.569E+7
Blue	170	-0.75	PastureHay	0.080	0.091	0.101	0.110	0.135	0.106	8.678E+5
Blue	170	-0.75	Water	0.082	0.097	0.108	0.122	0.189	0.111	2.495E+5
Blue	170	-0.75	Developed	0.088	0.107	0.115	0.124	0.157	0.118	1.266E+5
Blue	170	-0.75	Barren	0.116	0.147	0.162	0.180	0.238	0.161	8.146E+4
Blue	170	-0.75	Wetlands	0.085	0.095	0.102	0.108	0.123	0.102	9.920E+3
Blue	170	-0.75	ShrubScrub	0.096	0.111	0.120	0.130	0.157	0.114	4.506E+4
Blue	170	-0.75	Forest	0.087	0.099	0.106	0.113	0.129	0.102	1.212E+4
Blue	170	-0.75	All	0.088	0.107	0.115	0.123	0.144	0.113	1.532E+8
Blue	170	-0.25	Grassland	0.090	0.103	0.110	0.120	0.147	0.109	9.746E+7
Blue	170	-0.25	Cropland	0.085	0.097	0.107	0.121	0.150	0.109	1.919E+7
Blue	170	-0.25	PastureHay	0.083	0.091	0.098	0.107	0.139	0.099	1.231E+6
Blue	170	-0.25	Water	0.077	0.093	0.104	0.119	0.163	0.103	2.134E+5
Blue	170	-0.25	Developed	0.089	0.103	0.112	0.123	0.158	0.112	1.444E+5
Blue	170	-0.25	Barren	0.106	0.135	0.151	0.166	0.219	0.150	1.048E+5
Blue	170	-0.25	Wetlands	0.083	0.091	0.095	0.102	0.127	0.098	1.505E+4
Blue	170	-0.25	ShrubScrub	0.091	0.104	0.115	0.131	0.156	0.111	8.526E+4
Blue	170	-0.25	Forest	0.083	0.092	0.100	0.110	0.132	0.100	1.041E+4
Blue	170	-0.25	All	0.087	0.101	0.109	0.120	0.149	0.108	1.733E+8
Blue	170	0.25	Grassland	0.087	0.098	0.104	0.111	0.132	0.106	1.365E+8
Blue	170	0.25	Cropland	0.083	0.094	0.103	0.116	0.144	0.107	2.064E+7
Blue	170	0.25	PastureHay	0.083	0.090	0.095	0.102	0.122	0.098	1.138E+6
Blue	170	0.25	Water	0.078	0.090	0.100	0.112	0.179	0.104	3.548E+5
Blue	170	0.25	Developed	0.087	0.100	0.108	0.119	0.157	0.111	2.200E+5
Blue	170	0.25	Barren	0.100	0.130	0.149	0.168	0.247	0.151	1.149E+5
Blue	170	0.25	Wetlands	0.081	0.088	0.093	0.100	0.118	0.096	1.910E+4
Blue	170	0.25	ShrubScrub	0.089	0.098	0.104	0.112	0.140	0.107	7.981E+4
Blue	170	0.25	Forest	0.080	0.089	0.095	0.102	0.120	0.097	1.789E+4
Blue	170	0.25	All	0.085	0.096	0.103	0.111	0.136	0.106	2.243E+8
Blue	170	0.75	Grassland	0.087	0.096	0.101	0.107	0.127	0.102	1.554E+8
Blue	170	0.75	Cropland	0.083	0.093	0.102	0.115	0.140	0.105	3.213E+7
Blue	170	0.75	PastureHay	0.083	0.089	0.094	0.102	0.126	0.097	2.015E+6
Blue	170	0.75	Water	0.077	0.090	0.097	0.109	0.159	0.099	3.891E+5
Blue	170	0.75	Developed	0.088	0.099	0.107	0.117	0.159	0.110	2.322E+5
Blue	170	0.75	Barren	0.098	0.122	0.139	0.159	0.237	0.146	1.508E+5
Blue	170	0.75	Wetlands	0.080	0.088	0.092	0.097	0.115	0.093	2.056E+4
Blue	170	0.75	ShrubScrub	0.089	0.098	0.104	0.112	0.138	0.104	9.380E+4
Blue	170	0.75	Forest	0.080	0.088	0.095	0.103	0.122	0.094	1.693E+4
Blue	170	0.75	All	0.085	0.095	0.101	0.108	0.133	0.103	2.729E+8
Blue	170	1.25	Grassland	0.085	0.094	0.100	0.106	0.124	0.100	1.874E+8
Blue	170	1.25	Cropland	0.082	0.094	0.105	0.119	0.143	0.106	2.374E+7
Blue	170	1.25	PastureHay	0.084	0.091	0.097	0.107	0.136	0.098	1.136E+6
Blue	170	1.25	Water	0.077	0.091	0.102	0.113	0.151	0.103	4.344E+5
Blue	170	1.25	Developed	0.086	0.099	0.107	0.116	0.150	0.108	2.050E+5
Blue	170	1.25	Barren	0.094	0.115	0.133	0.153	0.219	0.143	1.902E+5
Blue	170	1.25	Wetlands	0.079	0.087	0.092	0.098	0.115	0.093	3.132E+4
Blue	170	1.25	ShrubScrub	0.086	0.097	0.102	0.110	0.135	0.104	1.243E+5
Blue	170	1.25	Forest	0.080	0.088	0.094	0.100	0.115	0.095	2.555E+4
Blue	170	1.25	All	0.083	0.094	0.100	0.107	0.133	0.101	2.973E+8
Blue	170	1.75	Grassland	0.085	0.095	0.101	0.108	0.124	0.100	1.274E+8
Blue	170	1.75	Cropland	0.082	0.096	0.109	0.120	0.142	0.108	2.432E+7
Blue	170	1.75	PastureHay	0.081	0.087	0.096	0.108	0.126	0.099	1.505E+6
Blue	170	1.75	Water	0.075	0.085	0.098	0.109	0.158	0.102	3.816E+5
Blue	170	1.75	Developed	0.086	0.099	0.108	0.118	0.155	0.109	1.960E+5
Blue	170	1.75	Barren	0.097	0.123	0.141	0.164	0.261	0.141	1.131E+5
Blue	170	1.75	Wetlands	0.081	0.089	0.095	0.101	0.119	0.094	1.846E+4
Blue	170	1.75	ShrubScrub	0.087	0.096	0.102	0.108	0.127	0.102	6.538E+4
Blue	170	1.75	Forest	0.081	0.091	0.098	0.105	0.120	0.095	1.330E+4
Blue	170	1.75	All	0.084	0.094	0.102	0.110	0.133	0.101	2.192E+8
Blue	170	All	Grassland	0.087	0.098	0.107	0.117	0.142	0.108	9.924E+8
Blue	170	All	Cropland	0.084	0.096	0.108	0.121	0.146	0.110	1.724E+8
Blue	170	All	PastureHay	0.082	0.091	0.099	0.109	0.133	0.103	1.036E+7
Blue	170	All	Water	0.077	0.092	0.102	0.117	0.176	0.106	2.520E+6
Blue	170	All	Developed	0.088	0.102	0.112	0.123	0.158	0.114	1.420E+6
Blue	170	All	Barren	0.099	0.129	0.149	0.170	0.254	0.153	9.617E+5
Blue	170	All	Wetlands	0.081	0.090	0.096	0.104	0.126	0.097	1.422E+5
Blue	170	All	ShrubScrub	0.089	0.100	0.109	0.121	0.150	0.110	6.262E+5
Blue	170	All	Forest	0.081	0.091	0.099	0.108	0.129	0.099	1.257E+5
Blue	170	All	All	0.085	0.098	0.106	0.118	0.144	0.108	1.680E+9
Blue	180	-1.75	Grassland	0.110	0.125	0.132	0.140	0.154	0.129	1.021E+8
Blue	180	-1.75	Cropland	0.097	0.116	0.125	0.135	0.154	0.125	1.733E+7
Blue	180	-1.75	PastureHay	0.096	0.110	0.117	0.124	0.141	0.123	1.210E+6
Blue	180	-1.75	Water	0.085	0.102	0.118	0.134	0.194	0.125	2.763E+5
Blue	180	-1.75	Developed	0.104	0.122	0.131	0.139	0.164	0.129	1.607E+5
Blue	180	-1.75	Barren	0.124	0.153	0.167	0.187	0.277	0.184	9.890E+4
Blue	180	-1.75	Wetlands	0.090	0.105	0.111	0.122	0.139	0.112	1.697E+4
Blue	180	-1.75	ShrubScrub	0.105	0.119	0.128	0.136	0.158	0.126	6.611E+4
Blue	180	-1.75	Forest	0.091	0.105	0.114	0.123	0.140	0.110	1.066E+4
Blue	180	-1.75	All	0.103	0.122	0.130	0.138	0.154	0.128	1.734E+8
Blue	180	-1.25	Grassland	0.098	0.114	0.122	0.129	0.150	0.120	1.107E+8
Blue	180	-1.25	Cropland	0.089	0.105	0.115	0.126	0.150	0.116	2.260E+7
Blue	180	-1.25	PastureHay	0.089	0.101	0.108	0.117	0.135	0.110	1.506E+6
Blue	180	-1.25	Water	0.082	0.102	0.116	0.130	0.191	0.115	2.553E+5
Blue	180	-1.25	Developed	0.098	0.114	0.122	0.131	0.159	0.123	1.626E+5
Blue	180	-1.25	Barren	0.119	0.150	0.166	0.186	0.266	0.171	1.256E+5
Blue	180	-1.25	Wetlands	0.089	0.099	0.105	0.113	0.137	0.105	1.268E+4
Blue	180	-1.25	ShrubScrub	0.101	0.114	0.121	0.130	0.154	0.122	7.812E+4
Blue	180	-1.25	Forest	0.088	0.100	0.108	0.116	0.133	0.107	2.091E+4
Blue	180	-1.25	All	0.093	0.111	0.120	0.128	0.151	0.119	1.957E+8
Blue	180	-0.75	Grassland	0.094	0.109	0.116	0.123	0.141	0.111	1.164E+8
Blue	180	-0.75	Cropland	0.084	0.099	0.110	0.122	0.145	0.109	2.171E+7
Blue	180	-0.75	PastureHay	0.080	0.091	0.101	0.110	0.134	0.103	1.363E+6
Blue	180	-0.75	Water	0.077	0.096	0.108	0.122	0.185	0.109	3.053E+5
Blue	180	-0.75	Developed	0.089	0.106	0.114	0.123	0.154	0.115	1.576E+5
Blue	180	-0.75	Barren	0.115	0.146	0.162	0.179	0.240	0.160	9.290E+4
Blue	180	-0.75	Wetlands	0.085	0.095	0.102	0.108	0.126	0.099	1.069E+4
Blue	180	-0.75	ShrubScrub	0.096	0.110	0.119	0.130	0.157	0.113	6.193E+4
Blue	180	-0.75	Forest	0.086	0.099	0.106	0.113	0.130	0.101	1.440E+4
Blue	180	-0.75	All	0.088	0.106	0.114	0.123	0.143	0.110	1.989E+8
Blue	180	-0.25	Grassland	0.090	0.102	0.109	0.119	0.150	0.109	1.168E+8
Blue	180	-0.25	Cropland	0.084	0.095	0.103	0.115	0.142	0.108	2.811E+7
Blue	180	-0.25	PastureHay	0.083	0.092	0.098	0.106	0.129	0.099	1.848E+6
Blue	180	-0.25	Water	0.077	0.088	0.097	0.111	0.152	0.102	3.021E+5
Blue	180	-0.25	Developed	0.089	0.102	0.110	0.120	0.154	0.111	1.788E+5
Blue	180	-0.25	Barren	0.107	0.136	0.150	0.166	0.212	0.151	1.283E+5
Blue	180	-0.25	Wetlands	0.083	0.091	0.096	0.104	0.133	0.097	1.936E+4
Blue	180	-0.25	ShrubScrub	0.092	0.103	0.113	0.127	0.156	0.111	1.174E+5
Blue	180	-0.25	Forest	0.081	0.091	0.099	0.107	0.132	0.101	1.323E+4
Blue	180	-0.25	All	0.086	0.100	0.107	0.117	0.149	0.108	2.207E+8
Blue	180	0.25	Grassland	0.088	0.098	0.104	0.111	0.130	0.104	1.858E+8
Blue	180	0.25	Cropland	0.083	0.094	0.103	0.115	0.140	0.106	2.947E+7
Blue	180	0.25	PastureHay	0.083	0.090	0.095	0.103	0.123	0.098	1.596E+6
Blue	180	0.25	Water	0.076	0.087	0.098	0.110	0.179	0.101	5.122E+5
Blue	180	0.25	Developed	0.088	0.101	0.109	0.119	0.157	0.111	3.087E+5
Blue	180	0.25	Barren	0.101	0.132	0.149	0.168	0.243	0.154	1.691E+5
Blue	180	0.25	Wetlands	0.081	0.088	0.092	0.098	0.117	0.095	1.813E+4
Blue	180	0.25	ShrubScrub	0.090	0.099	0.106	0.115	0.143	0.106	1.049E+5
Blue	180	0.25	Forest	0.080	0.090	0.096	0.104	0.121	0.096	2.453E+4
Blue	180	0.25	All	0.086	0.097	0.103	0.111	0.135	0.104	3.090E+8
Blue	180	0.75	Grassland	0.088	0.097	0.102	0.109	0.129	0.104	2.178E+8
Blue	180	0.75	Cropland	0.084	0.094	0.102	0.115	0.140	0.105	4.186E+7
Blue	180	0.75	PastureHay	0.084	0.090	0.096	0.104	0.126	0.098	2.557E+6
Blue	180	0.75	Water	0.077	0.090	0.098	0.110	0.159	0.101	5.098E+5
Blue	180	0.75	Developed	0.088	0.100	0.108	0.118	0.160	0.110	3.068E+5
Blue	180	0.75	Barren	0.098	0.125	0.142	0.162	0.240	0.148	1.954E+5
Blue	180	0.75	Wetlands	0.081	0.088	0.092	0.097	0.117	0.094	2.860E+4
Blue	180	0.75	ShrubScrub	0.089	0.100	0.106	0.115	0.140	0.106	1.365E+5
Blue	180	0.75	Forest	0.080	0.089	0.096	0.104	0.121	0.095	2.068E+4
Blue	180	0.75	All	0.086	0.096	0.102	0.110	0.134	0.104	3.751E+8
Blue	180	1.25	Grassland	0.085	0.094	0.100	0.105	0.125	0.100	2.266E+8
Blue	180	1.25	Cropland	0.082	0.093	0.103	0.117	0.142	0.105	3.045E+7
Blue	180	1.25	PastureHay	0.084	0.091	0.095	0.104	0.132	0.099	1.566E+6
Blue	180	1.25	Water	0.077	0.090	0.101	0.113	0.165	0.104	5.219E+5
Blue	180	1.25	Developed	0.087	0.099	0.107	0.117	0.153	0.109	2.702E+5
Blue	180	1.25	Barren	0.094	0.116	0.135	0.157	0.227	0.147	2.140E+5
Blue	180	1.25	Wetlands	0.080	0.087	0.092	0.098	0.117	0.093	3.666E+4
Blue	180	1.25	ShrubScrub	0.086	0.096	0.102	0.110	0.135	0.104	1.418E+5
Blue	180	1.25	Forest	0.080	0.088	0.095	0.100	0.119	0.094	3.085E+4
Blue	180	1.25	All	0.084	0.094	0.100	0.107	0.132	0.101	3.632E+8
Blue	180	1.75	Grassland	0.085	0.093	0.099	0.105	0.123	0.100	1.540E+8
Blue	180	1.75	Cropland	0.082	0.092	0.101	0.115	0.140	0.106	2.906E+7
Blue	180	1.75	PastureHay	0.081	0.087	0.090	0.098	0.124	0.098	1.791E+6
Blue	180	1.75	Water	0.073	0.082	0.090	0.105	0.145	0.101	4.594E+5
Blue	180	1.75	Developed	0.085	0.097	0.105	0.116	0.154	0.108	2.511E+5
Blue	180	1.75	Barren	0.097	0.120	0.139	0.161	0.241	0.142	1.350E+5
Blue	180	1.75	Wetlands	0.080	0.088	0.092	0.098	0.117	0.093	2.248E+4
Blue	180	1.75	ShrubScrub	0.086	0.094	0.100	0.108	0.131	0.102	6.379E+4
Blue	180	1.75	Forest	0.080	0.089	0.094	0.100	0.117	0.094	1.882E+4
Blue	180	1.75	All	0.084	0.093	0.098	0.106	0.131	0.101	2.639E+8
Blue	180	All	Grassland	0.087	0.099	0.106	0.118	0.144	0.107	1.230E+9
Blue	180	All	Cropland	0.084	0.095	0.106	0.119	0.145	0.109	2.206E+8
Blue	180	All	PastureHay	0.082	0.091	0.098	0.109	0.132	0.102	1.344E+7
Blue	180	All	Water	0.076	0.090	0.101	0.116	0.175	0.106	3.142E+6
Blue	180	All	Developed	0.088	0.102	0.111	0.123	0.158	0.113	1.797E+6
Blue	180	All	Barren	0.099	0.131	0.150	0.171	0.250	0.155	1.159E+6
Blue	180	All	Wetlands	0.081	0.090	0.096	0.104	0.130	0.097	1.656E+5
Blue	180	All	ShrubScrub	0.089	0.101	0.110	0.122	0.150	0.110	7.707E+5
Blue	180	All	Forest	0.081	0.091	0.099	0.108	0.130	0.099	1.541E+5
Blue	180	All	All	0.085	0.098	0.106	0.118	0.145	0.107	2.100E+9
Blue	190	-1.75	Grassland	0.110	0.125	0.131	0.138	0.152	0.129	1.156E+8
Blue	190	-1.75	Cropland	0.097	0.116	0.125	0.135	0.155	0.127	1.974E+7
Blue	190	-1.75	PastureHay	0.096	0.111	0.119	0.127	0.140	0.125	1.336E+6
Blue	190	-1.75	Water	0.084	0.101	0.116	0.130	0.178	0.121	2.824E+5
Blue	190	-1.75	Developed	0.104	0.121	0.129	0.137	0.162	0.131	1.866E+5
Blue	190	-1.75	Barren	0.123	0.153	0.166	0.181	0.270	0.176	1.168E+5
Blue	190	-1.75	Wetlands	0.090	0.103	0.109	0.119	0.137	0.114	1.890E+4
Blue	190	-1.75	ShrubScrub	0.106	0.121	0.129	0.138	0.159	0.128	7.333E+4
Blue	190	-1.75	Forest	0.090	0.103	0.112	0.121	0.139	0.110	1.500E+4
Blue	190	-1.75	All	0.103	0.122	0.129	0.137	0.153	0.128	1.961E+8
Blue	190	-1.25	Grassland	0.099	0.115	0.122	0.130	0.150	0.119	1.110E+8
Blue	190	-1.25	Cropland	0.089	0.104	0.116	0.127	0.152	0.117	2.109E+7
Blue	190	-1.25	PastureHay	0.090	0.102	0.110	0.118	0.136	0.111	1.447E+6
Blue	190	-1.25	Water	0.081	0.101	0.115	0.130	0.190	0.114	2.521E+5
Blue	190	-1.25	Developed	0.098	0.115	0.123	0.134	0.160	0.124	1.583E+5
Blue	190	-1.25	Barren	0.120	0.150	0.166	0.187	0.276	0.171	1.261E+5
Blue	190	-1.25	Wetlands	0.089	0.099	0.107	0.115	0.137	0.106	1.319E+4
Blue	190	-1.25	ShrubScrub	0.101	0.115	0.122	0.131	0.153	0.121	8.479E+4
Blue	190	-1.25	Forest	0.090	0.102	0.110	0.118	0.135	0.108	1.971E+4
Blue	190	-1.25	All	0.094	0.112	0.121	0.130	0.151	0.118	1.940E+8
Blue	190	-0.75	Grassland	0.097	0.111	0.118	0.125	0.144	0.113	1.380E+8
Blue	190	-0.75	Cropland	0.086	0.103	0.113	0.124	0.151	0.111	2.569E+7
Blue	190	-0.75	PastureHay	0.085	0.098	0.107	0.115	0.131	0.105	1.656E+6
Blue	190	-0.75	Water	0.079	0.099	0.112	0.123	0.187	0.107	3.438E+5
Blue	190	-0.75	Developed	0.094	0.109	0.118	0.127	0.156	0.116	1.903E+5
Blue	190	-0.75	Barren	0.114	0.144	0.160	0.177	0.249	0.152	1.038E+5
Blue	190	-0.75	Wetlands	0.085	0.095	0.100	0.108	0.128	0.100	1.455E+4
Blue	190	-0.75	ShrubScrub	0.096	0.111	0.116	0.123	0.148	0.112	5.829E+4
Blue	190	-0.75	Forest	0.086	0.098	0.107	0.116	0.136	0.103	1.650E+4
Blue	190	-0.75	All	0.091	0.109	0.116	0.125	0.146	0.111	2.350E+8
Blue	190	-0.25	Grassland	0.091	0.102	0.109	0.118	0.147	0.110	1.315E+8
Blue	190	-0.25	Cropland	0.084	0.095	0.104	0.117	0.145	0.110	3.242E+7
Blue	190	-0.25	PastureHay	0.084	0.093	0.099	0.106	0.128	0.101	2.094E+6
Blue	190	-0.25	Water	0.077	0.088	0.098	0.113	0.182	0.105	3.157E+5
Blue	190	-0.25	Developed	0.089	0.102	0.111	0.122	0.155	0.113	1.978E+5
Blue	190	-0.25	Barren	0.107	0.134	0.151	0.171	0.244	0.156	1.250E+5
Blue	190	-0.25	Wetlands	0.082	0.090	0.095	0.101	0.125	0.097	2.002E+4
Blue	190	-0.25	ShrubScrub	0.092	0.104	0.114	0.127	0.153	0.112	1.140E+5
Blue	190	-0.25	Forest	0.081	0.091	0.098	0.105	0.127	0.102	1.655E+4
Blue	190	-0.25	All	0.087	0.100	0.107	0.117	0.147	0.109	2.469E+8
Blue	190	0.25	Grassland	0.090	0.100	0.107	0.114	0.134	0.106	2.238E+8
Blue	190	0.25	Cropland	0.085	0.096	0.107	0.118	0.143	0.107	4.070E+7
Blue	190	0.25	PastureHay	0.085	0.092	0.098	0.107	0.124	0.101	2.419E+6
Blue	190	0.25	Water	0.077	0.088	0.099	0.114	0.192	0.102	6.365E+5
Blue	190	0.25	Developed	0.090	0.104	0.113	0.124	0.156	0.113	3.825E+5
Blue	190	0.25	Barren	0.103	0.134	0.154	0.179	0.271	0.150	2.057E+5
Blue	190	0.25	Wetlands	0.081	0.088	0.094	0.100	0.118	0.096	1.963E+4
Blue	190	0.25	ShrubScrub	0.091	0.100	0.106	0.115	0.143	0.106	1.338E+5
Blue	190	0.25	Forest	0.081	0.091	0.100	0.110	0.123	0.096	2.740E+4
Blue	190	0.25	All	0.087	0.099	0.106	0.115	0.137	0.106	3.837E+8
Blue	190	0.75	Grassland	0.089	0.099	0.105	0.113	0.132	0.105	2.654E+8
Blue	190	0.75	Cropland	0.084	0.094	0.104	0.117	0.144	0.107	4.683E+7
Blue	190	0.75	PastureHay	0.084	0.091	0.096	0.105	0.129	0.100	2.699E+6
Blue	190	0.75	Water	0.077	0.090	0.099	0.112	0.168	0.102	6.268E+5
Blue	190	0.75	Developed	0.089	0.102	0.111	0.120	0.159	0.112	3.834E+5
Blue	190	0.75	Barren	0.104	0.134	0.151	0.170	0.239	0.153	2.010E+5
Blue	190	0.75	Wetlands	0.081	0.088	0.092	0.099	0.119	0.095	3.869E+4
Blue	190	0.75	ShrubScrub	0.090	0.101	0.108	0.118	0.144	0.108	1.357E+5
Blue	190	0.75	Forest	0.080	0.090	0.097	0.105	0.122	0.095	2.848E+4
Blue	190	0.75	All	0.087	0.098	0.104	0.113	0.137	0.106	4.438E+8
Blue	190	1.25	Grassland	0.086	0.095	0.101	0.108	0.126	0.102	2.781E+8
Blue	190	1.25	Cropland	0.083	0.094	0.104	0.117	0.142	0.106	3.258E+7
Blue	190	1.25	PastureHay	0.084	0.091	0.096	0.103	0.129	0.099	1.350E+6
Blue	190	1.25	Water	0.075	0.089	0.100	0.113	0.178	0.103	6.234E+5
Blue	190	1.25	Developed	0.089	0.101	0.109	0.119	0.155	0.111	3.124E+5
Blue	190	1.25	Barren	0.095	0.117	0.135	0.156	0.220	0.145	2.808E+5
Blue	190	1.25	Wetlands	0.080	0.088	0.093	0.099	0.117	0.094	4.869E+4
Blue	190	1.25	ShrubScrub	0.086	0.096	0.102	0.110	0.135	0.105	1.726E+5
Blue	190	1.25	Forest	0.081	0.089	0.097	0.100	0.120	0.095	3.833E+4
Blue	190	1.25	All	0.085	0.095	0.101	0.109	0.132	0.103	4.327E+8
Blue	190	1.75	Grassland	0.085	0.094	0.099	0.105	0.124	0.099	1.981E+8
Blue	190	1.75	Cropland	0.082	0.091	0.099	0.112	0.138	0.104	3.488E+7
Blue	190	1.75	PastureHay	0.081	0.087	0.091	0.097	0.121	0.098	2.038E+6
Blue	190	1.75	Water	0.073	0.082	0.090	0.105	0.152	0.101	5.224E+5
Blue	190	1.75	Developed	0.085	0.097	0.105	0.115	0.151	0.107	2.945E+5
Blue	190	1.75	Barren	0.097	0.120	0.139	0.161	0.246	0.140	1.709E+5
Blue	190	1.75	Wetlands	0.080	0.087	0.091	0.097	0.117	0.092	2.737E+4
Blue	190	1.75	ShrubScrub	0.086	0.094	0.101	0.109	0.134	0.102	8.263E+4
Blue	190	1.75	Forest	0.080	0.089	0.094	0.100	0.116	0.093	2.444E+4
Blue	190	1.75	All	0.083	0.093	0.099	0.106	0.130	0.100	3.325E+8
Blue	190	All	Grassland	0.088	0.100	0.109	0.119	0.143	0.108	1.462E+9
Blue	190	All	Cropland	0.084	0.097	0.108	0.121	0.147	0.110	2.539E+8
Blue	190	All	PastureHay	0.084	0.092	0.101	0.111	0.132	0.104	1.504E+7
Blue	190	All	Water	0.076	0.090	0.102	0.118	0.183	0.105	3.603E+6
Blue	190	All	Developed	0.089	0.104	0.114	0.125	0.157	0.114	2.106E+6
Blue	190	All	Barren	0.100	0.132	0.152	0.173	0.256	0.153	1.330E+6
Blue	190	All	Wetlands	0.082	0.090	0.096	0.104	0.128	0.097	2.010E+5
Blue	190	All	ShrubScrub	0.089	0.102	0.111	0.122	0.149	0.110	8.552E+5
Blue	190	All	Forest	0.082	0.092	0.100	0.109	0.130	0.099	1.864E+5
Blue	190	All	All	0.086	0.099	0.108	0.119	0.145	0.108	2.465E+9
Blue	200	-1.75	Grassland	0.112	0.127	0.133	0.139	0.153	0.129	1.131E+8
Blue	200	-1.75	Cropland	0.099	0.119	0.128	0.138	0.158	0.128	2.165E+7
Blue	200	-1.75	PastureHay	0.101	0.114	0.121	0.129	0.145	0.122	1.546E+6
Blue	200	-1.75	Water	0.084	0.104	0.119	0.133	0.176	0.119	2.587E+5
Blue	200	-1.75	Developed	0.108	0.123	0.130	0.137	0.162	0.131	1.974E+5
Blue	200	-1.75	Barren	0.126	0.154	0.167	0.181	0.251	0.175	1.015E+5
Blue	200	-1.75	Wetlands	0.092	0.103	0.110	0.123	0.139	0.113	1.831E+4
Blue	200	-1.75	ShrubScrub	0.108	0.123	0.131	0.139	0.160	0.128	6.248E+4
Blue	200	-1.75	Forest	0.092	0.104	0.113	0.122	0.139	0.110	1.399E+4
Blue	200	-1.75	All	0.106	0.124	0.132	0.139	0.154	0.128	1.957E+8
Blue	200	-1.25	Grassland	0.100	0.115	0.124	0.132	0.151	0.122	1.251E+8
Blue	200	-1.25	Cropland	0.091	0.108	0.119	0.131	0.156	0.121	2.315E+7
Blue	200	-1.25	PastureHay	0.092	0.104	0.112	0.121	0.138	0.115	1.510E+6
Blue	200	-1.25	Water	0.080	0.100	0.114	0.128	0.182	0.114	2.832E+5
Blue	200	-1.25	Developed	0.100	0.116	0.125	0.135	0.159	0.125	1.729E+5
Blue	200	-1.25	Barren	0.124	0.154	0.170	0.200	0.294	0.173	1.356E+5
Blue	200	-1.25	Wetlands	0.089	0.100	0.108	0.118	0.139	0.109	1.544E+4
Blue	200	-1.25	ShrubScrub	0.100	0.114	0.124	0.134	0.153	0.124	9.806E+4
Blue	200	-1.25	Forest	0.091	0.104	0.113	0.122	0.139	0.112	2.580E+4
Blue	200	-1.25	All	0.096	0.114	0.123	0.132	0.153	0.121	2.170E+8
Blue	200	-0.75	Grassland	0.097	0.113	0.120	0.127	0.145	0.115	1.806E+8
Blue	200	-0.75	Cropland	0.086	0.105	0.114	0.125	0.152	0.114	3.361E+7
Blue	200	-0.75	PastureHay	0.085	0.099	0.108	0.116	0.135	0.109	2.153E+6
Blue	200	-0.75	Water	0.077	0.099	0.113	0.123	0.180	0.108	4.564E+5
Blue	200	-0.75	Developed	0.094	0.113	0.121	0.130	0.155	0.118	2.703E+5
Blue	200	-0.75	Barren	0.119	0.143	0.159	0.174	0.240	0.149	1.460E+5
Blue	200	-0.75	Wetlands	0.086	0.095	0.101	0.109	0.129	0.101	2.184E+4
Blue	200	-0.75	ShrubScrub	0.097	0.113	0.118	0.129	0.152	0.115	8.412E+4
Blue	200	-0.75	Forest	0.088	0.102	0.110	0.116	0.135	0.103	1.779E+4
Blue	200	-0.75	All	0.091	0.110	0.118	0.126	0.148	0.114	3.082E+8
Blue	200	-0.25	Grassland	0.091	0.103	0.112	0.121	0.138	0.112	1.291E+8
Blue	200	-0.25	Cropland	0.084	0.096	0.106	0.119	0.146	0.111	3.310E+7
Blue	200	-0.25	PastureHay	0.085	0.094	0.101	0.110	0.137	0.105	2.012E+6
Blue	200	-0.25	Water	0.078	0.086	0.097	0.113	0.174	0.104	3.378E+5
Blue	200	-0.25	Developed	0.089	0.103	0.113	0.123	0.156	0.114	1.952E+5
Blue	200	-0.25	Barren	0.103	0.131	0.149	0.168	0.236	0.155	1.080E+5
Blue	200	-0.25	Wetlands	0.083	0.092	0.099	0.107	0.121	0.099	1.938E+4
Blue	200	-0.25	ShrubScrub	0.092	0.103	0.111	0.121	0.142	0.113	8.899E+4
Blue	200	-0.25	Forest	0.080	0.094	0.102	0.109	0.126	0.103	1.693E+4
Blue	200	-0.25	All	0.087	0.101	0.110	0.120	0.141	0.111	2.413E+8
Blue	200	0.25	Grassland	0.090	0.102	0.108	0.115	0.136	0.107	1.985E+8
Blue	200	0.25	Cropland	0.085	0.097	0.108	0.118	0.144	0.107	3.590E+7
Blue	200	0.25	PastureHay	0.086	0.094	0.102	0.111	0.129	0.102	2.197E+6
Blue	200	0.25	Water	0.077	0.086	0.095	0.107	0.153	0.099	5.566E+5
Blue	200	0.25	Developed	0.090	0.104	0.112	0.122	0.157	0.113	3.326E+5
Blue	200	0.25	Barren	0.103	0.130	0.147	0.164	0.231	0.146	1.772E+5
Blue	200	0.25	Wetlands	0.082	0.089	0.094	0.101	0.119	0.097	1.754E+4
Blue	200	0.25	ShrubScrub	0.091	0.101	0.108	0.117	0.143	0.108	1.311E+5
Blue	200	0.25	Forest	0.081	0.090	0.098	0.106	0.124	0.097	2.330E+4
Blue	200	0.25	All	0.087	0.100	0.107	0.115	0.139	0.106	3.417E+8
Blue	200	0.75	Grassland	0.090	0.101	0.107	0.115	0.138	0.107	2.556E+8
Blue	200	0.75	Cropland	0.085	0.096	0.106	0.119	0.147	0.110	3.926E+7
Blue	200	0.75	PastureHay	0.085	0.093	0.099	0.108	0.136	0.102	2.093E+6
Blue	200	0.75	Water	0.077	0.091	0.100	0.117	0.167	0.105	5.995E+5
Blue	200	0.75	Developed	0.090	0.103	0.111	0.121	0.156	0.113	3.327E+5
Blue	200	0.75	Barren	0.105	0.134	0.151	0.169	0.242	0.155	2.026E+5
Blue	200	0.75	Wetlands	0.083	0.089	0.093	0.100	0.124	0.097	3.699E+4
Blue	200	0.75	ShrubScrub	0.092	0.102	0.109	0.119	0.145	0.110	1.289E+5
Blue	200	0.75	Forest	0.081	0.092	0.099	0.106	0.128	0.099	2.939E+4
Blue	200	0.75	All	0.088	0.099	0.107	0.116	0.141	0.108	4.145E+8
Blue	200	1.25	Grassland	0.086	0.097	0.103	0.110	0.130	0.104	2.784E+8
Blue	200	1.25	Cropland	0.085	0.096	0.105	0.118	0.143	0.108	3.100E+7
Blue	200	1.25	PastureHay	0.084	0.091	0.096	0.104	0.130	0.100	1.258E+6
Blue	200	1.25	Water	0.075	0.089	0.101	0.115	0.181	0.104	6.145E+5
Blue	200	1.25	Developed	0.089	0.102	0.110	0.121	0.156	0.113	3.058E+5
Blue	200	1.25	Barren	0.097	0.125	0.142	0.161	0.221	0.150	2.767E+5
Blue	200	1.25	Wetlands	0.081	0.089	0.094	0.100	0.119	0.095	5.074E+4
Blue	200	1.25	ShrubScrub	0.087	0.097	0.104	0.113	0.137	0.106	1.638E+5
Blue	200	1.25	Forest	0.081	0.090	0.096	0.103	0.122	0.096	3.691E+4
Blue	200	1.25	All	0.086	0.097	0.103	0.111	0.135	0.104	4.274E+8
Blue	200	1.75	Grassland	0.086	0.095	0.100	0.106	0.125	0.100	2.094E+8
Blue	200	1.75	Cropland	0.082	0.092	0.101	0.113	0.139	0.106	3.699E+7
Blue	200	1.75	PastureHay	0.081	0.087	0.091	0.098	0.121	0.098	2.152E+6
Blue	200	1.75	Water	0.074	0.083	0.093	0.108	0.161	0.102	5.244E+5
Blue	200	1.75	Developed	0.086	0.099	0.107	0.117	0.153	0.110	3.192E+5
Blue	200	1.75	Barren	0.097	0.124	0.142	0.164	0.257	0.146	1.612E+5
Blue	200	1.75	Wetlands	0.081	0.087	0.091	0.097	0.117	0.092	3.034E+4
Blue	200	1.75	ShrubScrub	0.087	0.096	0.102	0.110	0.134	0.104	8.086E+4
Blue	200	1.75	Forest	0.081	0.089	0.094	0.100	0.115	0.094	2.602E+4
Blue	200	1.75	All	0.084	0.094	0.100	0.107	0.131	0.101	3.506E+8
Blue	200	All	Grassland	0.089	0.101	0.110	0.121	0.144	0.110	1.490E+9
Blue	200	All	Cropland	0.085	0.098	0.110	0.123	0.150	0.112	2.547E+8
Blue	200	All	PastureHay	0.084	0.094	0.103	0.114	0.137	0.106	1.492E+7
Blue	200	All	Water	0.076	0.090	0.102	0.118	0.173	0.105	3.631E+6
Blue	200	All	Developed	0.090	0.105	0.115	0.126	0.157	0.116	2.126E+6
Blue	200	All	Barren	0.103	0.134	0.153	0.172	0.256	0.154	1.309E+6
Blue	200	All	Wetlands	0.082	0.091	0.097	0.106	0.130	0.099	2.106E+5
Blue	200	All	ShrubScrub	0.090	0.103	0.113	0.124	0.149	0.112	8.382E+5
Blue	200	All	Forest	0.082	0.093	0.101	0.111	0.133	0.101	1.901E+5
Blue	200	All	All	0.087	0.100	0.110	0.121	0.146	0.110	2.496E+9
Blue	210	-1.75	Grassland	0.112	0.126	0.132	0.138	0.151	0.130	9.804E+7
Blue	210	-1.75	Cropland	0.105	0.121	0.130	0.139	0.158	0.132	1.889E+7
Blue	210	-1.75	PastureHay	0.102	0.115	0.123	0.130	0.144	0.119	1.445E+6
Blue	210	-1.75	Water	0.086	0.106	0.119	0.133	0.179	0.119	2.035E+5
Blue	210	-1.75	Developed	0.108	0.122	0.129	0.136	0.160	0.133	1.705E+5
Blue	210	-1.75	Barren	0.128	0.155	0.167	0.180	0.238	0.180	8.161E+4
Blue	210	-1.75	Wetlands	0.093	0.103	0.109	0.120	0.139	0.113	1.590E+4
Blue	210	-1.75	ShrubScrub	0.107	0.121	0.128	0.137	0.159	0.128	5.541E+4
Blue	210	-1.75	Forest	0.093	0.104	0.112	0.120	0.135	0.111	1.072E+4
Blue	210	-1.75	All	0.108	0.124	0.131	0.138	0.154	0.130	1.704E+8
Blue	210	-1.25	Grassland	0.104	0.121	0.128	0.135	0.151	0.124	1.427E+8
Blue	210	-1.25	Cropland	0.092	0.113	0.123	0.135	0.156	0.124	2.411E+7
Blue	210	-1.25	PastureHay	0.092	0.106	0.115	0.123	0.139	0.116	1.309E+6
Blue	210	-1.25	Water	0.085	0.106	0.119	0.133	0.192	0.116	3.273E+5
Blue	210	-1.25	Developed	0.102	0.119	0.128	0.136	0.158	0.127	1.895E+5
Blue	210	-1.25	Barren	0.128	0.153	0.167	0.187	0.274	0.170	1.590E+5
Blue	210	-1.25	Wetlands	0.091	0.105	0.112	0.120	0.137	0.109	1.934E+4
Blue	210	-1.25	ShrubScrub	0.108	0.122	0.129	0.136	0.154	0.126	1.061E+5
Blue	210	-1.25	Forest	0.092	0.109	0.117	0.124	0.139	0.113	3.353E+4
Blue	210	-1.25	All	0.099	0.119	0.127	0.134	0.153	0.123	2.416E+8
Blue	210	-0.75	Grassland	0.097	0.115	0.124	0.131	0.148	0.115	1.808E+8
Blue	210	-0.75	Cropland	0.086	0.106	0.119	0.130	0.156	0.115	3.558E+7
Blue	210	-0.75	PastureHay	0.086	0.097	0.107	0.116	0.137	0.109	2.334E+6
Blue	210	-0.75	Water	0.076	0.096	0.111	0.126	0.188	0.107	4.616E+5
Blue	210	-0.75	Developed	0.094	0.113	0.122	0.131	0.159	0.119	2.824E+5
Blue	210	-0.75	Barren	0.119	0.147	0.162	0.178	0.259	0.150	1.636E+5
Blue	210	-0.75	Wetlands	0.087	0.096	0.103	0.112	0.132	0.101	2.358E+4
Blue	210	-0.75	ShrubScrub	0.098	0.116	0.124	0.133	0.155	0.115	9.009E+4
Blue	210	-0.75	Forest	0.088	0.100	0.110	0.120	0.138	0.103	1.987E+4
Blue	210	-0.75	All	0.092	0.112	0.122	0.130	0.151	0.114	3.142E+8
Blue	210	-0.25	Grassland	0.093	0.106	0.114	0.122	0.137	0.113	1.716E+8
Blue	210	-0.25	Cropland	0.086	0.100	0.112	0.123	0.146	0.113	4.008E+7
Blue	210	-0.25	PastureHay	0.086	0.097	0.104	0.112	0.134	0.106	2.586E+6
Blue	210	-0.25	Water	0.078	0.088	0.100	0.114	0.160	0.103	4.036E+5
Blue	210	-0.25	Developed	0.092	0.107	0.116	0.125	0.156	0.116	2.504E+5
Blue	210	-0.25	Barren	0.109	0.135	0.151	0.166	0.215	0.150	1.391E+5
Blue	210	-0.25	Wetlands	0.084	0.095	0.101	0.108	0.122	0.099	2.064E+4
Blue	210	-0.25	ShrubScrub	0.093	0.103	0.111	0.121	0.142	0.113	1.250E+5
Blue	210	-0.25	Forest	0.082	0.094	0.101	0.108	0.125	0.101	2.076E+4
Blue	210	-0.25	All	0.089	0.104	0.113	0.121	0.141	0.112	3.132E+8
Blue	210	0.25	Grassland	0.092	0.103	0.109	0.116	0.135	0.109	2.458E+8
Blue	210	0.25	Cropland	0.087	0.100	0.111	0.121	0.146	0.111	5.109E+7
Blue	210	0.25	PastureHay	0.087	0.096	0.103	0.111	0.131	0.104	3.208E+6
Blue	210	0.25	Water	0.077	0.086	0.096	0.108	0.152	0.101	7.118E+5
Blue	210	0.25	Developed	0.092	0.106	0.113	0.123	0.155	0.115	4.235E+5
Blue	210	0.25	Barren	0.105	0.130	0.147	0.165	0.234	0.152	2.125E+5
Blue	210	0.25	Wetlands	0.083	0.091	0.096	0.102	0.119	0.097	2.250E+4
Blue	210	0.25	ShrubScrub	0.092	0.103	0.110	0.118	0.143	0.110	1.583E+5
Blue	210	0.25	Forest	0.084	0.094	0.100	0.107	0.125	0.098	2.696E+4
Blue	210	0.25	All	0.089	0.102	0.109	0.117	0.139	0.109	4.368E+8
Blue	210	0.75	Grassland	0.091	0.102	0.108	0.116	0.137	0.108	2.905E+8
Blue	210	0.75	Cropland	0.086	0.099	0.109	0.121	0.147	0.113	4.100E+7
Blue	210	0.75	PastureHay	0.086	0.095	0.101	0.109	0.136	0.104	2.118E+6
Blue	210	0.75	Water	0.077	0.090	0.104	0.119	0.175	0.105	6.788E+5
Blue	210	0.75	Developed	0.091	0.105	0.113	0.122	0.156	0.114	3.511E+5
Blue	210	0.75	Barren	0.106	0.135	0.152	0.170	0.243	0.156	2.305E+5
Blue	210	0.75	Wetlands	0.083	0.090	0.095	0.103	0.124	0.097	4.120E+4
Blue	210	0.75	ShrubScrub	0.092	0.102	0.109	0.119	0.144	0.110	1.448E+5
Blue	210	0.75	Forest	0.082	0.093	0.100	0.107	0.129	0.098	3.420E+4
Blue	210	0.75	All	0.089	0.101	0.108	0.117	0.141	0.109	4.632E+8
Blue	210	1.25	Grassland	0.088	0.098	0.104	0.111	0.130	0.106	2.919E+8
Blue	210	1.25	Cropland	0.085	0.098	0.107	0.119	0.142	0.110	3.526E+7
Blue	210	1.25	PastureHay	0.084	0.091	0.098	0.108	0.130	0.102	1.717E+6
Blue	210	1.25	Water	0.076	0.086	0.098	0.113	0.180	0.104	6.970E+5
Blue	210	1.25	Developed	0.090	0.102	0.110	0.120	0.156	0.113	3.643E+5
Blue	210	1.25	Barren	0.100	0.126	0.143	0.163	0.225	0.149	2.850E+5
Blue	210	1.25	Wetlands	0.081	0.089	0.094	0.100	0.119	0.096	4.939E+4
Blue	210	1.25	ShrubScrub	0.087	0.099	0.105	0.114	0.138	0.108	1.576E+5
Blue	210	1.25	Forest	0.081	0.091	0.098	0.105	0.123	0.097	4.154E+4
Blue	210	1.25	All	0.086	0.098	0.104	0.112	0.135	0.106	4.557E+8
Blue	210	1.75	Grassland	0.088	0.096	0.101	0.107	0.126	0.102	1.996E+8
Blue	210	1.75	Cropland	0.083	0.093	0.101	0.114	0.138	0.106	3.214E+7
Blue	210	1.75	PastureHay	0.083	0.089	0.093	0.100	0.127	0.098	1.736E+6
Blue	210	1.75	Water	0.074	0.085	0.096	0.109	0.165	0.101	4.677E+5
Blue	210	1.75	Developed	0.088	0.099	0.107	0.117	0.152	0.110	2.929E+5
Blue	210	1.75	Barren	0.101	0.128	0.145	0.166	0.251	0.147	1.403E+5
Blue	210	1.75	Wetlands	0.081	0.087	0.091	0.097	0.115	0.093	3.257E+4
Blue	210	1.75	ShrubScrub	0.087	0.098	0.105	0.113	0.137	0.106	6.050E+4
Blue	210	1.75	Forest	0.080	0.088	0.093	0.099	0.113	0.093	2.334E+4
Blue	210	1.75	All	0.086	0.096	0.101	0.109	0.132	0.102	3.233E+8
Blue	210	All	Grassland	0.090	0.103	0.112	0.123	0.144	0.111	1.621E+9
Blue	210	All	Cropland	0.086	0.101	0.113	0.125	0.151	0.114	2.782E+8
Blue	210	All	PastureHay	0.085	0.095	0.104	0.115	0.137	0.106	1.645E+7
Blue	210	All	Water	0.076	0.089	0.103	0.118	0.177	0.105	3.951E+6
Blue	210	All	Developed	0.091	0.106	0.116	0.127	0.157	0.117	2.325E+6
Blue	210	All	Barren	0.106	0.136	0.154	0.172	0.245	0.155	1.412E+6
Blue	210	All	Wetlands	0.083	0.091	0.098	0.107	0.130	0.099	2.251E+5
Blue	210	All	ShrubScrub	0.091	0.104	0.114	0.126	0.149	0.113	8.978E+5
Blue	210	All	Forest	0.083	0.094	0.102	0.112	0.133	0.101	2.109E+5
Blue	210	All	All	0.088	0.102	0.111	0.123	0.146	0.111	2.718E+9
Blue	220	-1.75	Grassland	0.107	0.124	0.130	0.137	0.151	0.128	1.257E+8
Blue	220	-1.75	Cropland	0.100	0.118	0.129	0.139	0.158	0.130	2.451E+7
Blue	220	-1.75	PastureHay	0.097	0.112	0.121	0.130	0.145	0.117	1.956E+6
Blue	220	-1.75	Water	0.085	0.102	0.115	0.129	0.175	0.115	2.982E+5
Blue	220	-1.75	Developed	0.102	0.119	0.127	0.136	0.160	0.131	2.195E+5
Blue	220	-1.75	Barren	0.128	0.153	0.165	0.178	0.227	0.170	1.228E+5
Blue	220	-1.75	Wetlands	0.091	0.102	0.109	0.117	0.136	0.111	1.894E+4
Blue	220	-1.75	ShrubScrub	0.106	0.120	0.128	0.136	0.159	0.128	8.554E+4
Blue	220	-1.75	Forest	0.091	0.104	0.112	0.120	0.135	0.110	1.412E+4
Blue	220	-1.75	All	0.103	0.121	0.129	0.136	0.154	0.128	2.227E+8
Blue	220	-1.25	Grassland	0.105	0.121	0.128	0.135	0.152	0.124	1.632E+8
Blue	220	-1.25	Cropland	0.097	0.116	0.126	0.137	0.157	0.127	2.871E+7
Blue	220	-1.25	PastureHay	0.097	0.111	0.119	0.128	0.143	0.119	1.486E+6
Blue	220	-1.25	Water	0.085	0.106	0.118	0.132	0.194	0.116	3.510E+5
Blue	220	-1.25	Developed	0.104	0.119	0.128	0.136	0.159	0.127	2.019E+5
Blue	220	-1.25	Barren	0.129	0.152	0.166	0.183	0.265	0.160	1.908E+5
Blue	220	-1.25	Wetlands	0.092	0.105	0.112	0.120	0.136	0.109	2.094E+4
Blue	220	-1.25	ShrubScrub	0.105	0.121	0.129	0.136	0.156	0.126	1.352E+5
Blue	220	-1.25	Forest	0.092	0.108	0.116	0.124	0.142	0.113	3.893E+4
Blue	220	-1.25	All	0.102	0.119	0.127	0.135	0.154	0.125	2.795E+8
Blue	220	-0.75	Grassland	0.100	0.116	0.124	0.131	0.149	0.118	2.176E+8
Blue	220	-0.75	Cropland	0.092	0.112	0.122	0.133	0.157	0.120	4.251E+7
Blue	220	-0.75	PastureHay	0.090	0.103	0.111	0.119	0.138	0.112	2.811E+6
Blue	220	-0.75	Water	0.082	0.098	0.111	0.126	0.184	0.111	5.662E+5
Blue	220	-0.75	Developed	0.099	0.115	0.123	0.131	0.159	0.121	3.492E+5
Blue	220	-0.75	Barren	0.119	0.147	0.162	0.177	0.249	0.157	1.958E+5
Blue	220	-0.75	Wetlands	0.089	0.097	0.103	0.112	0.132	0.103	3.083E+4
Blue	220	-0.75	ShrubScrub	0.098	0.116	0.125	0.134	0.155	0.120	9.745E+4
Blue	220	-0.75	Forest	0.088	0.100	0.109	0.120	0.138	0.105	2.090E+4
Blue	220	-0.75	All	0.096	0.114	0.123	0.131	0.151	0.118	3.753E+8
Blue	220	-0.25	Grassland	0.096	0.109	0.116	0.123	0.138	0.115	1.903E+8
Blue	220	-0.25	Cropland	0.091	0.107	0.117	0.127	0.148	0.117	3.313E+7
Blue	220	-0.25	PastureHay	0.089	0.100	0.107	0.116	0.139	0.108	2.236E+6
Blue	220	-0.25	Water	0.080	0.094	0.105	0.117	0.165	0.106	4.195E+5
Blue	220	-0.25	Developed	0.096	0.110	0.118	0.127	0.155	0.118	2.548E+5
Blue	220	-0.25	Barren	0.110	0.138	0.152	0.167	0.212	0.156	1.574E+5
Blue	220	-0.25	Wetlands	0.085	0.096	0.101	0.108	0.123	0.102	2.177E+4
Blue	220	-0.25	ShrubScrub	0.094	0.106	0.114	0.122	0.144	0.115	1.281E+5
Blue	220	-0.25	Forest	0.084	0.094	0.101	0.108	0.126	0.101	1.958E+4
Blue	220	-0.25	All	0.094	0.108	0.116	0.123	0.142	0.115	3.232E+8
Blue	220	0.25	Grassland	0.094	0.105	0.111	0.118	0.137	0.111	2.708E+8
Blue	220	0.25	Cropland	0.090	0.104	0.114	0.124	0.148	0.114	5.722E+7
Blue	220	0.25	PastureHay	0.089	0.098	0.105	0.113	0.133	0.106	3.641E+6
Blue	220	0.25	Water	0.078	0.089	0.099	0.111	0.155	0.102	7.066E+5
Blue	220	0.25	Developed	0.095	0.107	0.115	0.124	0.154	0.116	4.380E+5
Blue	220	0.25	Barren	0.108	0.135	0.151	0.169	0.238	0.154	2.175E+5
Blue	220	0.25	Wetlands	0.084	0.092	0.097	0.103	0.121	0.098	3.221E+4
Blue	220	0.25	ShrubScrub	0.093	0.104	0.111	0.120	0.145	0.112	1.590E+5
Blue	220	0.25	Forest	0.085	0.094	0.101	0.109	0.126	0.099	3.309E+4
Blue	220	0.25	All	0.092	0.104	0.111	0.119	0.141	0.111	4.804E+8
Blue	220	0.75	Grassland	0.094	0.104	0.110	0.118	0.140	0.110	2.800E+8
Blue	220	0.75	Cropland	0.089	0.102	0.113	0.125	0.150	0.116	3.763E+7
Blue	220	0.75	PastureHay	0.088	0.097	0.103	0.112	0.141	0.107	1.855E+6
Blue	220	0.75	Water	0.079	0.092	0.104	0.120	0.180	0.107	7.112E+5
Blue	220	0.75	Developed	0.095	0.107	0.115	0.124	0.156	0.116	3.504E+5
Blue	220	0.75	Barren	0.108	0.137	0.153	0.172	0.246	0.156	2.312E+5
Blue	220	0.75	Wetlands	0.085	0.092	0.097	0.105	0.128	0.098	3.958E+4
Blue	220	0.75	ShrubScrub	0.093	0.104	0.112	0.121	0.145	0.112	1.259E+5
Blue	220	0.75	Forest	0.084	0.094	0.100	0.107	0.131	0.100	3.676E+4
Blue	220	0.75	All	0.091	0.103	0.110	0.119	0.144	0.111	4.401E+8
Blue	220	1.25	Grassland	0.088	0.100	0.106	0.113	0.133	0.108	2.866E+8
Blue	220	1.25	Cropland	0.086	0.099	0.110	0.121	0.143	0.113	3.167E+7
Blue	220	1.25	PastureHay	0.085	0.092	0.100	0.111	0.132	0.106	1.495E+6
Blue	220	1.25	Water	0.075	0.086	0.099	0.112	0.176	0.105	6.781E+5
Blue	220	1.25	Developed	0.091	0.104	0.112	0.121	0.155	0.115	3.328E+5
Blue	220	1.25	Barren	0.101	0.128	0.144	0.164	0.228	0.150	3.181E+5
Blue	220	1.25	Wetlands	0.083	0.090	0.095	0.102	0.120	0.097	4.836E+4
Blue	220	1.25	ShrubScrub	0.088	0.100	0.107	0.116	0.139	0.109	1.788E+5
Blue	220	1.25	Forest	0.082	0.092	0.099	0.107	0.123	0.098	4.204E+4
Blue	220	1.25	All	0.087	0.099	0.107	0.114	0.136	0.109	4.435E+8
Blue	220	1.75	Grassland	0.088	0.098	0.104	0.110	0.127	0.104	2.064E+8
Blue	220	1.75	Cropland	0.084	0.095	0.106	0.119	0.141	0.109	3.303E+7
Blue	220	1.75	PastureHay	0.083	0.089	0.094	0.102	0.130	0.099	1.590E+6
Blue	220	1.75	Water	0.076	0.087	0.097	0.110	0.168	0.101	4.620E+5
Blue	220	1.75	Developed	0.089	0.101	0.109	0.117	0.152	0.112	2.964E+5
Blue	220	1.75	Barren	0.102	0.129	0.147	0.169	0.261	0.148	1.222E+5
Blue	220	1.75	Wetlands	0.081	0.088	0.092	0.098	0.115	0.094	3.343E+4
Blue	220	1.75	ShrubScrub	0.088	0.101	0.107	0.114	0.136	0.107	5.766E+4
Blue	220	1.75	Forest	0.081	0.088	0.093	0.099	0.115	0.093	2.134E+4
Blue	220	1.75	All	0.086	0.097	0.104	0.111	0.134	0.105	3.307E+8
Blue	220	All	Grassland	0.092	0.105	0.114	0.124	0.144	0.113	1.741E+9
Blue	220	All	Cropland	0.088	0.105	0.116	0.128	0.152	0.118	2.884E+8
Blue	220	All	PastureHay	0.086	0.098	0.107	0.117	0.140	0.109	1.707E+7
Blue	220	All	Water	0.078	0.092	0.104	0.119	0.177	0.107	4.193E+6
Blue	220	All	Developed	0.093	0.108	0.117	0.127	0.157	0.119	2.443E+6
Blue	220	All	Barren	0.108	0.138	0.155	0.173	0.243	0.156	1.556E+6
Blue	220	All	Wetlands	0.083	0.092	0.099	0.108	0.129	0.100	2.461E+5
Blue	220	All	ShrubScrub	0.092	0.106	0.116	0.127	0.150	0.116	9.677E+5
Blue	220	All	Forest	0.083	0.094	0.103	0.113	0.134	0.102	2.268E+5
Blue	220	All	All	0.090	0.105	0.114	0.124	0.147	0.114	2.895E+9
Blue	230	-1.75	Grassland	0.107	0.122	0.129	0.136	0.151	0.127	1.445E+8
Blue	230	-1.75	Cropland	0.101	0.119	0.128	0.137	0.156	0.128	3.064E+7
Blue	230	-1.75	PastureHay	0.097	0.111	0.119	0.127	0.144	0.116	2.442E+6
Blue	230	-1.75	Water	0.085	0.102	0.115	0.129	0.175	0.112	3.710E+5
Blue	230	-1.75	Developed	0.104	0.119	0.126	0.135	0.159	0.127	2.660E+5
Blue	230	-1.75	Barren	0.126	0.151	0.164	0.179	0.229	0.171	1.345E+5
Blue	230	-1.75	Wetlands	0.091	0.104	0.111	0.118	0.137	0.109	2.029E+4
Blue	230	-1.75	ShrubScrub	0.102	0.117	0.125	0.134	0.155	0.126	1.073E+5
Blue	230	-1.75	Forest	0.091	0.105	0.112	0.121	0.140	0.108	1.564E+4
Blue	230	-1.75	All	0.103	0.120	0.128	0.136	0.152	0.126	2.624E+8
Blue	230	-1.25	Grassland	0.104	0.118	0.126	0.134	0.151	0.124	1.965E+8
Blue	230	-1.25	Cropland	0.098	0.115	0.124	0.135	0.156	0.127	3.480E+7
Blue	230	-1.25	PastureHay	0.096	0.108	0.116	0.124	0.141	0.118	1.836E+6
Blue	230	-1.25	Water	0.081	0.101	0.114	0.129	0.192	0.115	4.434E+5
Blue	230	-1.25	Developed	0.102	0.116	0.124	0.133	0.157	0.126	2.350E+5
Blue	230	-1.25	Barren	0.127	0.152	0.165	0.182	0.259	0.164	2.225E+5
Blue	230	-1.25	Wetlands	0.089	0.101	0.108	0.116	0.134	0.109	2.417E+4
Blue	230	-1.25	ShrubScrub	0.103	0.120	0.128	0.137	0.157	0.126	1.510E+5
Blue	230	-1.25	Forest	0.091	0.106	0.115	0.124	0.141	0.111	4.568E+4
Blue	230	-1.25	All	0.101	0.117	0.125	0.133	0.153	0.124	3.376E+8
Blue	230	-0.75	Grassland	0.100	0.115	0.123	0.131	0.148	0.119	2.318E+8
Blue	230	-0.75	Cropland	0.095	0.112	0.122	0.132	0.154	0.122	4.534E+7
Blue	230	-0.75	PastureHay	0.092	0.103	0.110	0.120	0.139	0.113	2.923E+6
Blue	230	-0.75	Water	0.082	0.098	0.109	0.124	0.178	0.112	6.334E+5
Blue	230	-0.75	Developed	0.099	0.114	0.121	0.130	0.157	0.121	3.690E+5
Blue	230	-0.75	Barren	0.118	0.147	0.162	0.177	0.249	0.162	2.066E+5
Blue	230	-0.75	Wetlands	0.087	0.098	0.104	0.111	0.132	0.103	2.948E+4
Blue	230	-0.75	ShrubScrub	0.098	0.115	0.123	0.133	0.153	0.121	1.094E+5
Blue	230	-0.75	Forest	0.088	0.098	0.105	0.114	0.133	0.103	2.309E+4
Blue	230	-0.75	All	0.096	0.113	0.122	0.130	0.150	0.119	3.999E+8
Blue	230	-0.25	Grassland	0.096	0.110	0.117	0.125	0.140	0.116	2.161E+8
Blue	230	-0.25	Cropland	0.091	0.108	0.119	0.130	0.150	0.119	3.882E+7
Blue	230	-0.25	PastureHay	0.089	0.100	0.108	0.118	0.142	0.110	2.627E+6
Blue	230	-0.25	Water	0.080	0.096	0.108	0.119	0.149	0.105	5.220E+5
Blue	230	-0.25	Developed	0.096	0.110	0.118	0.127	0.153	0.119	2.985E+5
Blue	230	-0.25	Barren	0.114	0.141	0.154	0.168	0.207	0.154	1.821E+5
Blue	230	-0.25	Wetlands	0.085	0.096	0.102	0.110	0.126	0.102	2.506E+4
Blue	230	-0.25	ShrubScrub	0.095	0.108	0.117	0.127	0.145	0.117	1.540E+5
Blue	230	-0.25	Forest	0.084	0.093	0.102	0.109	0.128	0.101	1.916E+4
Blue	230	-0.25	All	0.094	0.109	0.117	0.125	0.144	0.116	3.699E+8
Blue	230	0.25	Grassland	0.095	0.107	0.113	0.121	0.138	0.112	2.701E+8
Blue	230	0.25	Cropland	0.091	0.105	0.116	0.127	0.151	0.117	5.458E+7
Blue	230	0.25	PastureHay	0.089	0.099	0.105	0.114	0.136	0.107	3.464E+6
Blue	230	0.25	Water	0.079	0.089	0.101	0.114	0.161	0.103	6.600E+5
Blue	230	0.25	Developed	0.095	0.108	0.116	0.125	0.155	0.116	4.120E+5
Blue	230	0.25	Barren	0.109	0.136	0.151	0.168	0.232	0.153	2.371E+5
Blue	230	0.25	Wetlands	0.085	0.093	0.099	0.107	0.126	0.099	3.210E+4
Blue	230	0.25	ShrubScrub	0.094	0.106	0.113	0.123	0.146	0.112	1.689E+5
Blue	230	0.25	Forest	0.086	0.095	0.103	0.111	0.128	0.099	3.565E+4
Blue	230	0.25	All	0.093	0.106	0.113	0.121	0.143	0.113	4.751E+8
Blue	230	0.75	Grassland	0.094	0.105	0.112	0.119	0.140	0.111	2.397E+8
Blue	230	0.75	Cropland	0.091	0.105	0.116	0.126	0.149	0.117	3.389E+7
Blue	230	0.75	PastureHay	0.088	0.099	0.106	0.114	0.141	0.108	1.794E+6
Blue	230	0.75	Water	0.080	0.094	0.105	0.119	0.177	0.109	6.092E+5
Blue	230	0.75	Developed	0.096	0.109	0.116	0.124	0.155	0.116	3.090E+5
Blue	230	0.75	Barren	0.106	0.136	0.153	0.173	0.245	0.155	1.690E+5
Blue	230	0.75	Wetlands	0.085	0.093	0.098	0.105	0.127	0.099	3.306E+4
Blue	230	0.75	ShrubScrub	0.091	0.103	0.112	0.121	0.144	0.114	9.669E+4
Blue	230	0.75	Forest	0.085	0.094	0.100	0.107	0.130	0.101	3.049E+4
Blue	230	0.75	All	0.092	0.105	0.112	0.120	0.144	0.112	3.805E+8
Blue	230	1.25	Grassland	0.090	0.101	0.107	0.114	0.134	0.109	2.350E+8
Blue	230	1.25	Cropland	0.088	0.102	0.112	0.122	0.143	0.113	2.697E+7
Blue	230	1.25	PastureHay	0.085	0.094	0.103	0.113	0.133	0.105	1.475E+6
Blue	230	1.25	Water	0.077	0.089	0.099	0.112	0.176	0.105	5.782E+5
Blue	230	1.25	Developed	0.091	0.104	0.112	0.121	0.153	0.115	2.885E+5
Blue	230	1.25	Barren	0.102	0.129	0.146	0.165	0.228	0.151	2.802E+5
Blue	230	1.25	Wetlands	0.083	0.091	0.095	0.101	0.120	0.097	3.485E+4
Blue	230	1.25	ShrubScrub	0.090	0.102	0.109	0.118	0.141	0.110	1.511E+5
Blue	230	1.25	Forest	0.083	0.092	0.099	0.107	0.124	0.099	3.461E+4
Blue	230	1.25	All	0.088	0.101	0.108	0.115	0.137	0.109	3.686E+8
Blue	230	1.75	Grassland	0.089	0.100	0.106	0.112	0.129	0.106	1.920E+8
Blue	230	1.75	Cropland	0.088	0.100	0.110	0.122	0.143	0.112	2.967E+7
Blue	230	1.75	PastureHay	0.085	0.093	0.099	0.108	0.131	0.102	1.409E+6
Blue	230	1.75	Water	0.075	0.086	0.096	0.110	0.166	0.102	4.522E+5
Blue	230	1.75	Developed	0.090	0.102	0.109	0.118	0.153	0.112	2.679E+5
Blue	230	1.75	Barren	0.103	0.131	0.149	0.169	0.251	0.148	1.004E+5
Blue	230	1.75	Wetlands	0.081	0.088	0.092	0.098	0.115	0.095	3.462E+4
Blue	230	1.75	ShrubScrub	0.089	0.103	0.109	0.116	0.137	0.110	4.700E+4
Blue	230	1.75	Forest	0.080	0.088	0.093	0.101	0.117	0.093	1.812E+4
Blue	230	1.75	All	0.088	0.099	0.106	0.113	0.136	0.107	3.038E+8
Blue	230	All	Grassland	0.093	0.107	0.115	0.125	0.145	0.115	1.726E+9
Blue	230	All	Cropland	0.091	0.107	0.118	0.129	0.152	0.119	2.947E+8
Blue	230	All	PastureHay	0.088	0.100	0.108	0.118	0.140	0.110	1.797E+7
Blue	230	All	Water	0.079	0.092	0.105	0.119	0.174	0.107	4.269E+6
Blue	230	All	Developed	0.094	0.109	0.117	0.127	0.155	0.119	2.446E+6
Blue	230	All	Barren	0.109	0.139	0.156	0.173	0.239	0.157	1.532E+6
Blue	230	All	Wetlands	0.084	0.093	0.100	0.108	0.129	0.101	2.336E+5
Blue	230	All	ShrubScrub	0.093	0.107	0.117	0.128	0.150	0.117	9.854E+5
Blue	230	All	Forest	0.084	0.095	0.103	0.113	0.134	0.103	2.225E+5
Blue	230	All	All	0.092	0.106	0.115	0.125	0.147	0.116	2.898E+9
Blue	240	-1.75	Grassland	0.107	0.121	0.128	0.135	0.151	0.125	1.238E+8
Blue	240	-1.75	Cropland	0.100	0.118	0.127	0.136	0.155	0.126	2.399E+7
Blue	240	-1.75	PastureHay	0.096	0.109	0.117	0.125	0.142	0.115	1.828E+6
Blue	240	-1.75	Water	0.085	0.101	0.114	0.128	0.177	0.111	3.306E+5
Blue	240	-1.75	Developed	0.102	0.118	0.125	0.134	0.159	0.125	2.127E+5
Blue	240	-1.75	Barren	0.125	0.151	0.165	0.180	0.229	0.165	1.269E+5
Blue	240	-1.75	Wetlands	0.091	0.105	0.111	0.118	0.137	0.108	1.677E+4
Blue	240	-1.75	ShrubScrub	0.101	0.116	0.124	0.133	0.155	0.124	1.011E+5
Blue	240	-1.75	Forest	0.091	0.105	0.112	0.120	0.141	0.107	1.409E+4
Blue	240	-1.75	All	0.102	0.119	0.127	0.135	0.152	0.125	2.203E+8
Blue	240	-1.25	Grassland	0.103	0.118	0.126	0.133	0.152	0.123	1.757E+8
Blue	240	-1.25	Cropland	0.098	0.116	0.125	0.134	0.155	0.126	3.244E+7
Blue	240	-1.25	PastureHay	0.093	0.105	0.113	0.123	0.142	0.115	1.840E+6
Blue	240	-1.25	Water	0.081	0.097	0.111	0.125	0.190	0.113	4.166E+5
Blue	240	-1.25	Developed	0.101	0.116	0.124	0.134	0.158	0.125	2.238E+5
Blue	240	-1.25	Barren	0.127	0.151	0.165	0.182	0.256	0.163	1.844E+5
Blue	240	-1.25	Wetlands	0.089	0.099	0.107	0.113	0.133	0.107	2.093E+4
Blue	240	-1.25	ShrubScrub	0.101	0.118	0.127	0.136	0.158	0.125	1.360E+5
Blue	240	-1.25	Forest	0.090	0.104	0.112	0.121	0.143	0.109	3.831E+4
Blue	240	-1.25	All	0.100	0.117	0.125	0.133	0.153	0.123	3.067E+8
Blue	240	-0.75	Grassland	0.099	0.113	0.121	0.129	0.146	0.118	2.231E+8
Blue	240	-0.75	Cropland	0.095	0.111	0.121	0.131	0.154	0.121	4.612E+7
Blue	240	-0.75	PastureHay	0.092	0.103	0.110	0.120	0.137	0.110	3.223E+6
Blue	240	-0.75	Water	0.080	0.094	0.106	0.121	0.180	0.109	6.438E+5
Blue	240	-0.75	Developed	0.098	0.111	0.119	0.128	0.155	0.119	3.483E+5
Blue	240	-0.75	Barren	0.116	0.145	0.161	0.178	0.253	0.162	2.057E+5
Blue	240	-0.75	Wetlands	0.086	0.095	0.101	0.109	0.131	0.101	2.766E+4
Blue	240	-0.75	ShrubScrub	0.097	0.111	0.120	0.129	0.151	0.120	1.056E+5
Blue	240	-0.75	Forest	0.085	0.097	0.104	0.113	0.133	0.103	2.549E+4
Blue	240	-0.75	All	0.096	0.111	0.120	0.128	0.148	0.118	3.929E+8
Blue	240	-0.25	Grassland	0.097	0.110	0.117	0.123	0.139	0.115	2.625E+8
Blue	240	-0.25	Cropland	0.094	0.112	0.121	0.130	0.150	0.119	4.327E+7
Blue	240	-0.25	PastureHay	0.091	0.101	0.108	0.117	0.139	0.109	3.042E+6
Blue	240	-0.25	Water	0.080	0.092	0.104	0.116	0.161	0.105	6.243E+5
Blue	240	-0.25	Developed	0.097	0.110	0.118	0.126	0.153	0.118	3.445E+5
Blue	240	-0.25	Barren	0.116	0.142	0.155	0.170	0.223	0.154	2.448E+5
Blue	240	-0.25	Wetlands	0.085	0.094	0.100	0.106	0.124	0.101	2.656E+4
Blue	240	-0.25	ShrubScrub	0.094	0.108	0.115	0.124	0.146	0.115	2.174E+5
Blue	240	-0.25	Forest	0.084	0.094	0.101	0.108	0.122	0.100	2.327E+4
Blue	240	-0.25	All	0.095	0.109	0.117	0.124	0.143	0.116	4.450E+8
Blue	240	0.25	Grassland	0.095	0.107	0.114	0.121	0.137	0.112	3.446E+8
Blue	240	0.25	Cropland	0.092	0.107	0.117	0.127	0.150	0.117	6.560E+7
Blue	240	0.25	PastureHay	0.089	0.099	0.106	0.114	0.134	0.107	4.135E+6
Blue	240	0.25	Water	0.079	0.090	0.102	0.114	0.165	0.103	8.251E+5
Blue	240	0.25	Developed	0.096	0.108	0.116	0.125	0.154	0.117	5.054E+5
Blue	240	0.25	Barren	0.112	0.137	0.152	0.169	0.232	0.154	2.762E+5
Blue	240	0.25	Wetlands	0.086	0.093	0.099	0.107	0.124	0.100	4.237E+4
Blue	240	0.25	ShrubScrub	0.095	0.107	0.114	0.123	0.145	0.112	1.930E+5
Blue	240	0.25	Forest	0.086	0.095	0.102	0.110	0.127	0.100	4.503E+4
Blue	240	0.25	All	0.093	0.106	0.114	0.122	0.142	0.113	5.944E+8
Blue	240	0.75	Grassland	0.093	0.105	0.112	0.119	0.136	0.113	2.638E+8
Blue	240	0.75	Cropland	0.091	0.106	0.116	0.126	0.147	0.117	3.957E+7
Blue	240	0.75	PastureHay	0.087	0.098	0.105	0.114	0.135	0.108	2.104E+6
Blue	240	0.75	Water	0.080	0.094	0.103	0.116	0.177	0.108	6.935E+5
Blue	240	0.75	Developed	0.095	0.109	0.116	0.124	0.155	0.117	3.702E+5
Blue	240	0.75	Barren	0.107	0.137	0.154	0.174	0.244	0.157	1.731E+5
Blue	240	0.75	Wetlands	0.085	0.093	0.098	0.105	0.126	0.100	3.564E+4
Blue	240	0.75	ShrubScrub	0.090	0.103	0.112	0.121	0.142	0.114	9.279E+4
Blue	240	0.75	Forest	0.085	0.094	0.100	0.108	0.126	0.101	3.260E+4
Blue	240	0.75	All	0.092	0.105	0.112	0.120	0.140	0.113	4.215E+8
Blue	240	1.25	Grassland	0.089	0.100	0.107	0.114	0.132	0.109	2.269E+8
Blue	240	1.25	Cropland	0.088	0.102	0.111	0.121	0.142	0.114	2.704E+7
Blue	240	1.25	PastureHay	0.084	0.094	0.103	0.113	0.133	0.106	1.471E+6
Blue	240	1.25	Water	0.077	0.088	0.098	0.112	0.169	0.105	5.777E+5
Blue	240	1.25	Developed	0.091	0.103	0.111	0.120	0.151	0.114	2.827E+5
Blue	240	1.25	Barren	0.101	0.128	0.144	0.164	0.227	0.149	2.599E+5
Blue	240	1.25	Wetlands	0.082	0.089	0.094	0.100	0.117	0.097	3.470E+4
Blue	240	1.25	ShrubScrub	0.090	0.101	0.109	0.118	0.141	0.112	1.471E+5
Blue	240	1.25	Forest	0.082	0.091	0.098	0.107	0.125	0.099	3.787E+4
Blue	240	1.25	All	0.088	0.100	0.107	0.115	0.136	0.110	3.590E+8
Blue	240	1.75	Grassland	0.090	0.101	0.107	0.113	0.130	0.106	1.867E+8
Blue	240	1.75	Cropland	0.089	0.102	0.112	0.123	0.143	0.112	2.793E+7
Blue	240	1.75	PastureHay	0.085	0.095	0.102	0.110	0.131	0.103	1.293E+6
Blue	240	1.75	Water	0.075	0.087	0.097	0.110	0.166	0.100	4.439E+5
Blue	240	1.75	Developed	0.090	0.103	0.110	0.118	0.151	0.110	2.525E+5
Blue	240	1.75	Barren	0.104	0.131	0.149	0.169	0.221	0.141	9.659E+4
Blue	240	1.75	Wetlands	0.082	0.089	0.093	0.098	0.116	0.096	3.360E+4
Blue	240	1.75	ShrubScrub	0.089	0.103	0.109	0.117	0.136	0.110	4.727E+4
Blue	240	1.75	Forest	0.081	0.088	0.094	0.101	0.117	0.094	1.620E+4
Blue	240	1.75	All	0.089	0.101	0.107	0.114	0.136	0.107	2.931E+8
Blue	240	All	Grassland	0.093	0.107	0.115	0.124	0.144	0.114	1.807E+9
Blue	240	All	Cropland	0.091	0.108	0.119	0.129	0.151	0.119	3.060E+8
Blue	240	All	PastureHay	0.088	0.100	0.108	0.117	0.138	0.109	1.894E+7
Blue	240	All	Water	0.079	0.092	0.104	0.117	0.175	0.106	4.555E+6
Blue	240	All	Developed	0.094	0.109	0.117	0.126	0.155	0.118	2.540E+6
Blue	240	All	Barren	0.109	0.139	0.156	0.173	0.238	0.156	1.568E+6
Blue	240	All	Wetlands	0.084	0.093	0.099	0.107	0.128	0.100	2.382E+5
Blue	240	All	ShrubScrub	0.093	0.107	0.116	0.126	0.149	0.116	1.040E+6
Blue	240	All	Forest	0.084	0.095	0.103	0.112	0.133	0.102	2.329E+5
Blue	240	All	All	0.092	0.106	0.115	0.124	0.146	0.115	3.033E+9
Blue	250	-1.75	Grassland	0.106	0.121	0.127	0.134	0.151	0.125	1.110E+8
Blue	250	-1.75	Cropland	0.100	0.117	0.126	0.135	0.154	0.126	2.094E+7
Blue	250	-1.75	PastureHay	0.097	0.110	0.117	0.125	0.141	0.116	1.638E+6
Blue	250	-1.75	Water	0.085	0.103	0.115	0.127	0.172	0.111	3.056E+5
Blue	250	-1.75	Developed	0.102	0.117	0.124	0.133	0.158	0.126	1.895E+5
Blue	250	-1.75	Barren	0.125	0.150	0.163	0.178	0.223	0.169	1.239E+5
Blue	250	-1.75	Wetlands	0.091	0.104	0.112	0.118	0.136	0.107	1.376E+4
Blue	250	-1.75	ShrubScrub	0.101	0.116	0.124	0.133	0.154	0.124	9.775E+4
Blue	250	-1.75	Forest	0.091	0.105	0.112	0.120	0.142	0.109	1.261E+4
Blue	250	-1.75	All	0.102	0.119	0.126	0.134	0.152	0.125	1.969E+8
Blue	250	-1.25	Grassland	0.103	0.118	0.126	0.133	0.152	0.123	1.699E+8
Blue	250	-1.25	Cropland	0.100	0.116	0.125	0.134	0.155	0.125	3.182E+7
Blue	250	-1.25	PastureHay	0.093	0.104	0.113	0.123	0.142	0.114	1.934E+6
Blue	250	-1.25	Water	0.081	0.096	0.111	0.126	0.192	0.115	3.932E+5
Blue	250	-1.25	Developed	0.101	0.115	0.124	0.133	0.157	0.124	2.222E+5
Blue	250	-1.25	Barren	0.124	0.150	0.165	0.182	0.258	0.165	1.824E+5
Blue	250	-1.25	Wetlands	0.089	0.099	0.105	0.113	0.133	0.106	1.929E+4
Blue	250	-1.25	ShrubScrub	0.101	0.118	0.127	0.136	0.158	0.125	1.300E+5
Blue	250	-1.25	Forest	0.089	0.102	0.110	0.119	0.143	0.107	3.921E+4
Blue	250	-1.25	All	0.100	0.116	0.124	0.133	0.154	0.123	2.981E+8
Blue	250	-0.75	Grassland	0.099	0.113	0.120	0.128	0.145	0.117	2.508E+8
Blue	250	-0.75	Cropland	0.097	0.112	0.122	0.132	0.154	0.121	5.221E+7
Blue	250	-0.75	PastureHay	0.092	0.104	0.111	0.121	0.138	0.110	3.681E+6
Blue	250	-0.75	Water	0.080	0.094	0.105	0.120	0.181	0.108	7.220E+5
Blue	250	-0.75	Developed	0.098	0.112	0.120	0.128	0.154	0.119	3.937E+5
Blue	250	-0.75	Barren	0.115	0.144	0.160	0.177	0.245	0.161	2.667E+5
Blue	250	-0.75	Wetlands	0.086	0.095	0.101	0.109	0.131	0.102	3.086E+4
Blue	250	-0.75	ShrubScrub	0.097	0.110	0.119	0.128	0.152	0.119	1.390E+5
Blue	250	-0.75	Forest	0.085	0.096	0.102	0.111	0.130	0.103	3.048E+4
Blue	250	-0.75	All	0.097	0.112	0.120	0.128	0.148	0.118	4.438E+8
Blue	250	-0.25	Grassland	0.098	0.110	0.117	0.123	0.139	0.116	2.581E+8
Blue	250	-0.25	Cropland	0.097	0.113	0.121	0.130	0.150	0.121	3.904E+7
Blue	250	-0.25	PastureHay	0.092	0.103	0.108	0.116	0.137	0.110	2.697E+6
Blue	250	-0.25	Water	0.080	0.092	0.104	0.116	0.158	0.105	6.568E+5
Blue	250	-0.25	Developed	0.097	0.110	0.117	0.126	0.152	0.118	3.261E+5
Blue	250	-0.25	Barren	0.117	0.141	0.155	0.170	0.223	0.153	2.439E+5
Blue	250	-0.25	Wetlands	0.085	0.094	0.100	0.107	0.124	0.102	2.603E+4
Blue	250	-0.25	ShrubScrub	0.094	0.107	0.115	0.123	0.145	0.115	2.212E+5
Blue	250	-0.25	Forest	0.084	0.095	0.102	0.109	0.122	0.101	2.107E+4
Blue	250	-0.25	All	0.096	0.110	0.117	0.124	0.143	0.117	4.315E+8
Blue	250	0.25	Grassland	0.096	0.108	0.115	0.121	0.138	0.113	3.399E+8
Blue	250	0.25	Cropland	0.094	0.109	0.118	0.128	0.149	0.119	6.258E+7
Blue	250	0.25	PastureHay	0.090	0.100	0.107	0.115	0.136	0.109	3.734E+6
Blue	250	0.25	Water	0.080	0.091	0.102	0.115	0.164	0.104	7.991E+5
Blue	250	0.25	Developed	0.097	0.109	0.116	0.124	0.154	0.117	4.689E+5
Blue	250	0.25	Barren	0.112	0.139	0.153	0.170	0.232	0.154	2.859E+5
Blue	250	0.25	Wetlands	0.086	0.094	0.100	0.107	0.125	0.101	4.424E+4
Blue	250	0.25	ShrubScrub	0.096	0.108	0.116	0.124	0.146	0.113	1.850E+5
Blue	250	0.25	Forest	0.086	0.095	0.102	0.110	0.128	0.100	4.597E+4
Blue	250	0.25	All	0.094	0.108	0.115	0.123	0.142	0.114	5.799E+8
Blue	250	0.75	Grassland	0.093	0.105	0.112	0.120	0.137	0.112	2.609E+8
Blue	250	0.75	Cropland	0.091	0.106	0.116	0.126	0.146	0.116	4.492E+7
Blue	250	0.75	PastureHay	0.087	0.097	0.104	0.114	0.139	0.106	2.640E+6
Blue	250	0.75	Water	0.080	0.093	0.102	0.116	0.178	0.107	7.189E+5
Blue	250	0.75	Developed	0.094	0.108	0.116	0.125	0.154	0.117	4.175E+5
Blue	250	0.75	Barren	0.108	0.139	0.156	0.176	0.248	0.158	1.615E+5
Blue	250	0.75	Wetlands	0.085	0.093	0.097	0.104	0.125	0.099	3.528E+4
Blue	250	0.75	ShrubScrub	0.090	0.102	0.111	0.121	0.144	0.112	9.048E+4
Blue	250	0.75	Forest	0.085	0.094	0.100	0.108	0.126	0.099	3.132E+4
Blue	250	0.75	All	0.091	0.105	0.112	0.120	0.140	0.113	4.300E+8
Blue	250	1.25	Grassland	0.089	0.100	0.107	0.114	0.134	0.110	2.386E+8
Blue	250	1.25	Cropland	0.088	0.101	0.111	0.121	0.141	0.114	2.710E+7
Blue	250	1.25	PastureHay	0.085	0.093	0.100	0.110	0.132	0.105	1.375E+6
Blue	250	1.25	Water	0.076	0.087	0.095	0.110	0.173	0.104	5.942E+5
Blue	250	1.25	Developed	0.091	0.102	0.110	0.119	0.152	0.114	2.746E+5
Blue	250	1.25	Barren	0.101	0.127	0.143	0.163	0.226	0.148	2.924E+5
Blue	250	1.25	Wetlands	0.083	0.089	0.094	0.101	0.117	0.098	3.863E+4
Blue	250	1.25	ShrubScrub	0.090	0.100	0.108	0.117	0.141	0.110	1.739E+5
Blue	250	1.25	Forest	0.082	0.091	0.099	0.108	0.127	0.099	3.686E+4
Blue	250	1.25	All	0.088	0.100	0.107	0.115	0.136	0.110	3.753E+8
Blue	250	1.75	Grassland	0.090	0.102	0.107	0.113	0.130	0.106	2.055E+8
Blue	250	1.75	Cropland	0.090	0.102	0.111	0.121	0.141	0.111	3.072E+7
Blue	250	1.75	PastureHay	0.086	0.096	0.102	0.110	0.130	0.102	1.451E+6
Blue	250	1.75	Water	0.076	0.087	0.098	0.110	0.168	0.099	4.784E+5
Blue	250	1.75	Developed	0.091	0.103	0.109	0.117	0.149	0.109	2.752E+5
Blue	250	1.75	Barren	0.101	0.129	0.147	0.165	0.216	0.139	9.462E+4
Blue	250	1.75	Wetlands	0.083	0.090	0.094	0.099	0.116	0.095	3.398E+4
Blue	250	1.75	ShrubScrub	0.090	0.102	0.108	0.114	0.133	0.107	5.905E+4
Blue	250	1.75	Forest	0.081	0.089	0.094	0.101	0.116	0.095	1.947E+4
Blue	250	1.75	All	0.089	0.101	0.107	0.114	0.135	0.107	3.241E+8
Blue	250	All	Grassland	0.093	0.107	0.115	0.124	0.144	0.114	1.835E+9
Blue	250	All	Cropland	0.092	0.109	0.119	0.129	0.151	0.119	3.093E+8
Blue	250	All	PastureHay	0.088	0.100	0.108	0.118	0.138	0.109	1.915E+7
Blue	250	All	Water	0.078	0.091	0.103	0.117	0.175	0.106	4.668E+6
Blue	250	All	Developed	0.094	0.108	0.117	0.126	0.154	0.118	2.568E+6
Blue	250	All	Barren	0.109	0.139	0.155	0.173	0.236	0.156	1.651E+6
Blue	250	All	Wetlands	0.085	0.093	0.099	0.107	0.128	0.100	2.421E+5
Blue	250	All	ShrubScrub	0.093	0.107	0.116	0.126	0.150	0.116	1.096E+6
Blue	250	All	Forest	0.084	0.095	0.102	0.111	0.133	0.101	2.370E+5
Blue	250	All	All	0.092	0.107	0.115	0.125	0.146	0.115	3.080E+9
Blue	260	-1.75	Grassland	0.107	0.121	0.127	0.135	0.151	0.125	7.567E+7
Blue	260	-1.75	Cropland	0.104	0.119	0.127	0.135	0.152	0.125	1.295E+7
Blue	260	-1.75	PastureHay	0.101	0.113	0.118	0.125	0.141	0.115	9.514E+5
Blue	260	-1.75	Water	0.086	0.106	0.117	0.129	0.173	0.112	1.932E+5
Blue	260	-1.75	Developed	0.107	0.119	0.126	0.133	0.158	0.125	1.168E+5
Blue	260	-1.75	Barren	0.124	0.148	0.162	0.177	0.218	0.170	7.918E+4
Blue	260	-1.75	Wetlands	0.093	0.106	0.112	0.120	0.139	0.108	8.013E+3
Blue	260	-1.75	ShrubScrub	0.099	0.113	0.123	0.132	0.152	0.124	6.295E+4
Blue	260	-1.75	Forest	0.093	0.107	0.114	0.123	0.145	0.110	7.764E+3
Blue	260	-1.75	All	0.105	0.119	0.127	0.135	0.152	0.124	1.300E+8
Blue	260	-1.25	Grassland	0.103	0.118	0.124	0.131	0.149	0.123	1.646E+8
Blue	260	-1.25	Cropland	0.100	0.115	0.123	0.132	0.153	0.125	2.862E+7
Blue	260	-1.25	PastureHay	0.093	0.105	0.112	0.121	0.140	0.113	1.859E+6
Blue	260	-1.25	Water	0.081	0.098	0.111	0.124	0.191	0.116	3.741E+5
Blue	260	-1.25	Developed	0.101	0.115	0.123	0.132	0.155	0.123	2.293E+5
Blue	260	-1.25	Barren	0.121	0.149	0.163	0.181	0.257	0.165	1.727E+5
Blue	260	-1.25	Wetlands	0.089	0.098	0.105	0.112	0.130	0.106	1.984E+4
Blue	260	-1.25	ShrubScrub	0.100	0.116	0.125	0.134	0.158	0.125	1.253E+5
Blue	260	-1.25	Forest	0.089	0.101	0.108	0.117	0.139	0.107	3.677E+4
Blue	260	-1.25	All	0.100	0.116	0.124	0.131	0.151	0.123	2.838E+8
Blue	260	-0.75	Grassland	0.100	0.112	0.120	0.127	0.145	0.119	2.241E+8
Blue	260	-0.75	Cropland	0.098	0.113	0.123	0.133	0.154	0.122	5.255E+7
Blue	260	-0.75	PastureHay	0.093	0.104	0.110	0.119	0.138	0.110	3.691E+6
Blue	260	-0.75	Water	0.080	0.090	0.103	0.118	0.180	0.109	6.942E+5
Blue	260	-0.75	Developed	0.098	0.111	0.119	0.127	0.154	0.120	3.644E+5
Blue	260	-0.75	Barren	0.116	0.146	0.161	0.178	0.241	0.164	2.642E+5
Blue	260	-0.75	Wetlands	0.086	0.095	0.102	0.110	0.130	0.103	2.650E+4
Blue	260	-0.75	ShrubScrub	0.097	0.111	0.120	0.130	0.156	0.121	1.392E+5
Blue	260	-0.75	Forest	0.086	0.097	0.104	0.112	0.130	0.104	3.245E+4
Blue	260	-0.75	All	0.097	0.111	0.119	0.128	0.148	0.119	4.124E+8
Blue	260	-0.25	Grassland	0.098	0.110	0.117	0.124	0.139	0.117	2.345E+8
Blue	260	-0.25	Cropland	0.098	0.113	0.122	0.131	0.150	0.121	3.935E+7
Blue	260	-0.25	PastureHay	0.092	0.103	0.109	0.117	0.135	0.110	2.802E+6
Blue	260	-0.25	Water	0.079	0.092	0.104	0.116	0.156	0.105	5.853E+5
Blue	260	-0.25	Developed	0.097	0.109	0.117	0.125	0.151	0.119	3.026E+5
Blue	260	-0.25	Barren	0.117	0.142	0.156	0.172	0.224	0.152	2.192E+5
Blue	260	-0.25	Wetlands	0.084	0.095	0.101	0.108	0.125	0.103	2.253E+4
Blue	260	-0.25	ShrubScrub	0.094	0.108	0.115	0.124	0.146	0.115	2.046E+5
Blue	260	-0.25	Forest	0.084	0.095	0.102	0.109	0.123	0.101	1.950E+4
Blue	260	-0.25	All	0.096	0.110	0.117	0.125	0.143	0.118	4.007E+8
Blue	260	0.25	Grassland	0.097	0.110	0.116	0.123	0.139	0.115	3.000E+8
Blue	260	0.25	Cropland	0.096	0.111	0.120	0.129	0.150	0.120	5.374E+7
Blue	260	0.25	PastureHay	0.090	0.101	0.109	0.118	0.138	0.110	3.061E+6
Blue	260	0.25	Water	0.081	0.093	0.103	0.116	0.169	0.105	7.298E+5
Blue	260	0.25	Developed	0.097	0.110	0.117	0.126	0.154	0.118	4.102E+5
Blue	260	0.25	Barren	0.112	0.139	0.154	0.171	0.241	0.152	2.441E+5
Blue	260	0.25	Wetlands	0.087	0.095	0.101	0.108	0.126	0.103	3.738E+4
Blue	260	0.25	ShrubScrub	0.097	0.110	0.117	0.126	0.146	0.114	1.615E+5
Blue	260	0.25	Forest	0.087	0.097	0.105	0.112	0.128	0.102	3.820E+4
Blue	260	0.25	All	0.095	0.109	0.116	0.124	0.143	0.115	5.072E+8
Blue	260	0.75	Grassland	0.094	0.107	0.114	0.121	0.137	0.114	2.436E+8
Blue	260	0.75	Cropland	0.091	0.108	0.118	0.127	0.146	0.118	4.516E+7
Blue	260	0.75	PastureHay	0.088	0.099	0.106	0.115	0.138	0.110	2.842E+6
Blue	260	0.75	Water	0.080	0.094	0.103	0.117	0.172	0.107	6.562E+5
Blue	260	0.75	Developed	0.095	0.109	0.117	0.125	0.155	0.118	4.129E+5
Blue	260	0.75	Barren	0.112	0.138	0.154	0.174	0.236	0.158	1.582E+5
Blue	260	0.75	Wetlands	0.086	0.094	0.100	0.107	0.125	0.102	3.608E+4
Blue	260	0.75	ShrubScrub	0.091	0.104	0.113	0.123	0.145	0.113	9.388E+4
Blue	260	0.75	Forest	0.085	0.096	0.102	0.111	0.127	0.101	2.912E+4
Blue	260	0.75	All	0.092	0.106	0.114	0.122	0.141	0.114	4.106E+8
Blue	260	1.25	Grassland	0.090	0.103	0.110	0.117	0.135	0.111	2.452E+8
Blue	260	1.25	Cropland	0.089	0.104	0.113	0.122	0.142	0.114	2.670E+7
Blue	260	1.25	PastureHay	0.086	0.096	0.102	0.109	0.128	0.106	1.235E+6
Blue	260	1.25	Water	0.076	0.088	0.099	0.114	0.174	0.107	5.862E+5
Blue	260	1.25	Developed	0.092	0.104	0.111	0.120	0.152	0.114	2.628E+5
Blue	260	1.25	Barren	0.102	0.128	0.145	0.164	0.230	0.149	2.905E+5
Blue	260	1.25	Wetlands	0.084	0.091	0.096	0.102	0.119	0.099	3.572E+4
Blue	260	1.25	ShrubScrub	0.090	0.101	0.109	0.118	0.142	0.111	1.695E+5
Blue	260	1.25	Forest	0.083	0.093	0.101	0.110	0.128	0.100	3.833E+4
Blue	260	1.25	All	0.089	0.102	0.110	0.118	0.137	0.112	3.817E+8
Blue	260	1.75	Grassland	0.093	0.103	0.108	0.115	0.132	0.107	2.043E+8
Blue	260	1.75	Cropland	0.091	0.103	0.111	0.121	0.142	0.112	3.255E+7
Blue	260	1.75	PastureHay	0.087	0.096	0.103	0.110	0.128	0.103	1.647E+6
Blue	260	1.75	Water	0.077	0.089	0.099	0.112	0.172	0.100	4.931E+5
Blue	260	1.75	Developed	0.092	0.103	0.110	0.118	0.151	0.110	2.804E+5
Blue	260	1.75	Barren	0.104	0.130	0.148	0.165	0.218	0.140	1.061E+5
Blue	260	1.75	Wetlands	0.085	0.091	0.096	0.101	0.118	0.097	3.378E+4
Blue	260	1.75	ShrubScrub	0.092	0.103	0.108	0.115	0.135	0.108	6.698E+4
Blue	260	1.75	Forest	0.083	0.092	0.097	0.103	0.117	0.096	1.831E+4
Blue	260	1.75	All	0.091	0.103	0.108	0.115	0.135	0.108	3.274E+8
Blue	260	All	Grassland	0.095	0.109	0.116	0.124	0.143	0.115	1.692E+9
Blue	260	All	Cropland	0.094	0.110	0.120	0.129	0.150	0.119	2.916E+8
Blue	260	All	PastureHay	0.089	0.101	0.109	0.118	0.138	0.110	1.809E+7
Blue	260	All	Water	0.079	0.092	0.104	0.118	0.176	0.107	4.312E+6
Blue	260	All	Developed	0.095	0.109	0.117	0.126	0.154	0.118	2.380E+6
Blue	260	All	Barren	0.110	0.139	0.155	0.173	0.236	0.156	1.534E+6
Blue	260	All	Wetlands	0.085	0.094	0.100	0.108	0.127	0.102	2.198E+5
Blue	260	All	ShrubScrub	0.093	0.107	0.116	0.126	0.150	0.116	1.024E+6
Blue	260	All	Forest	0.085	0.096	0.104	0.112	0.132	0.102	2.204E+5
Blue	260	All	All	0.093	0.108	0.116	0.125	0.146	0.116	2.854E+9
Blue	270	-1.75	Grassland	0.107	0.119	0.124	0.130	0.148	0.124	5.414E+7
Blue	270	-1.75	Cropland	0.103	0.115	0.123	0.131	0.150	0.123	8.646E+6
Blue	270	-1.75	PastureHay	0.100	0.110	0.116	0.124	0.141	0.116	7.336E+5
Blue	270	-1.75	Water	0.090	0.107	0.117	0.126	0.159	0.113	1.304E+5
Blue	270	-1.75	Developed	0.104	0.116	0.123	0.130	0.155	0.124	6.457E+4
Blue	270	-1.75	Barren	0.124	0.146	0.160	0.176	0.216	0.162	7.917E+4
Blue	270	-1.75	Wetlands	0.092	0.101	0.109	0.117	0.139	0.107	3.119E+3
Blue	270	-1.75	ShrubScrub	0.100	0.115	0.124	0.132	0.157	0.125	5.169E+4
Blue	270	-1.75	Forest	0.090	0.100	0.107	0.116	0.146	0.108	2.658E+3
Blue	270	-1.75	All	0.104	0.118	0.124	0.131	0.150	0.124	9.293E+7
Blue	270	-1.25	Grassland	0.102	0.117	0.124	0.132	0.151	0.120	1.676E+8
Blue	270	-1.25	Cropland	0.099	0.114	0.121	0.131	0.154	0.122	2.835E+7
Blue	270	-1.25	PastureHay	0.092	0.103	0.110	0.118	0.135	0.110	1.767E+6
Blue	270	-1.25	Water	0.081	0.097	0.111	0.126	0.198	0.115	3.832E+5
Blue	270	-1.25	Developed	0.101	0.113	0.121	0.130	0.155	0.121	2.363E+5
Blue	270	-1.25	Barren	0.120	0.147	0.164	0.182	0.259	0.163	1.630E+5
Blue	270	-1.25	Wetlands	0.089	0.100	0.106	0.113	0.131	0.105	2.255E+4
Blue	270	-1.25	ShrubScrub	0.099	0.113	0.122	0.131	0.157	0.121	1.246E+5
Blue	270	-1.25	Forest	0.090	0.101	0.107	0.115	0.140	0.106	3.790E+4
Blue	270	-1.25	All	0.099	0.115	0.122	0.131	0.152	0.120	2.853E+8
Blue	270	-0.75	Grassland	0.100	0.113	0.119	0.126	0.143	0.119	2.009E+8
Blue	270	-0.75	Cropland	0.098	0.111	0.120	0.130	0.152	0.121	5.209E+7
Blue	270	-0.75	PastureHay	0.093	0.101	0.108	0.116	0.135	0.110	3.589E+6
Blue	270	-0.75	Water	0.080	0.093	0.106	0.118	0.178	0.110	6.391E+5
Blue	270	-0.75	Developed	0.098	0.111	0.118	0.126	0.154	0.120	3.402E+5
Blue	270	-0.75	Barren	0.117	0.145	0.158	0.174	0.228	0.162	2.451E+5
Blue	270	-0.75	Wetlands	0.088	0.098	0.104	0.111	0.130	0.103	2.711E+4
Blue	270	-0.75	ShrubScrub	0.094	0.106	0.115	0.125	0.154	0.119	1.297E+5
Blue	270	-0.75	Forest	0.086	0.097	0.104	0.112	0.130	0.103	2.930E+4
Blue	270	-0.75	All	0.098	0.111	0.118	0.126	0.146	0.119	3.811E+8
Blue	270	-0.25	Grassland	0.099	0.111	0.117	0.123	0.139	0.117	2.326E+8
Blue	270	-0.25	Cropland	0.099	0.113	0.121	0.131	0.148	0.120	4.106E+7
Blue	270	-0.25	PastureHay	0.094	0.103	0.109	0.116	0.133	0.109	3.100E+6
Blue	270	-0.25	Water	0.080	0.092	0.103	0.115	0.173	0.106	5.238E+5
Blue	270	-0.25	Developed	0.097	0.110	0.117	0.126	0.150	0.119	3.100E+5
Blue	270	-0.25	Barren	0.117	0.141	0.155	0.172	0.222	0.152	2.193E+5
Blue	270	-0.25	Wetlands	0.085	0.096	0.102	0.109	0.127	0.102	2.123E+4
Blue	270	-0.25	ShrubScrub	0.094	0.106	0.114	0.123	0.146	0.117	1.962E+5
Blue	270	-0.25	Forest	0.085	0.096	0.103	0.111	0.127	0.103	2.136E+4
Blue	270	-0.25	All	0.097	0.110	0.117	0.124	0.143	0.117	4.023E+8
Blue	270	0.25	Grassland	0.097	0.110	0.117	0.124	0.140	0.116	2.767E+8
Blue	270	0.25	Cropland	0.097	0.112	0.121	0.129	0.149	0.120	4.690E+7
Blue	270	0.25	PastureHay	0.090	0.101	0.109	0.118	0.138	0.111	2.586E+6
Blue	270	0.25	Water	0.081	0.093	0.102	0.116	0.170	0.106	6.856E+5
Blue	270	0.25	Developed	0.098	0.110	0.118	0.127	0.154	0.119	3.710E+5
Blue	270	0.25	Barren	0.112	0.137	0.153	0.171	0.238	0.154	2.097E+5
Blue	270	0.25	Wetlands	0.087	0.095	0.102	0.109	0.126	0.104	3.372E+4
Blue	270	0.25	ShrubScrub	0.097	0.110	0.117	0.125	0.147	0.114	1.349E+5
Blue	270	0.25	Forest	0.087	0.098	0.105	0.112	0.128	0.104	3.319E+4
Blue	270	0.25	All	0.095	0.110	0.117	0.125	0.143	0.117	4.609E+8
Blue	270	0.75	Grassland	0.095	0.108	0.116	0.123	0.139	0.114	2.227E+8
Blue	270	0.75	Cropland	0.092	0.109	0.119	0.128	0.146	0.118	4.152E+7
Blue	270	0.75	PastureHay	0.088	0.099	0.107	0.116	0.139	0.110	2.632E+6
Blue	270	0.75	Water	0.081	0.095	0.104	0.117	0.181	0.108	6.480E+5
Blue	270	0.75	Developed	0.095	0.109	0.117	0.126	0.156	0.118	3.701E+5
Blue	270	0.75	Barren	0.113	0.139	0.156	0.174	0.232	0.158	1.670E+5
Blue	270	0.75	Wetlands	0.088	0.097	0.103	0.111	0.129	0.103	3.504E+4
Blue	270	0.75	ShrubScrub	0.093	0.106	0.115	0.124	0.147	0.113	9.128E+4
Blue	270	0.75	Forest	0.087	0.097	0.103	0.110	0.126	0.102	2.680E+4
Blue	270	0.75	All	0.093	0.108	0.116	0.123	0.142	0.115	3.762E+8
Blue	270	1.25	Grassland	0.092	0.105	0.111	0.119	0.137	0.113	2.277E+8
Blue	270	1.25	Cropland	0.090	0.106	0.115	0.124	0.143	0.115	2.360E+7
Blue	270	1.25	PastureHay	0.089	0.098	0.105	0.112	0.130	0.108	1.025E+6
Blue	270	1.25	Water	0.077	0.088	0.100	0.115	0.183	0.109	5.261E+5
Blue	270	1.25	Developed	0.093	0.105	0.113	0.122	0.152	0.115	2.411E+5
Blue	270	1.25	Barren	0.102	0.128	0.144	0.164	0.230	0.150	2.606E+5
Blue	270	1.25	Wetlands	0.084	0.091	0.096	0.103	0.121	0.100	3.170E+4
Blue	270	1.25	ShrubScrub	0.090	0.102	0.110	0.119	0.142	0.112	1.644E+5
Blue	270	1.25	Forest	0.084	0.095	0.102	0.110	0.130	0.102	3.456E+4
Blue	270	1.25	All	0.090	0.104	0.111	0.119	0.139	0.113	3.517E+8
Blue	270	1.75	Grassland	0.094	0.105	0.110	0.116	0.132	0.109	1.880E+8
Blue	270	1.75	Cropland	0.093	0.104	0.113	0.122	0.141	0.113	2.583E+7
Blue	270	1.75	PastureHay	0.091	0.099	0.105	0.112	0.130	0.106	1.167E+6
Blue	270	1.75	Water	0.079	0.091	0.101	0.113	0.175	0.101	4.461E+5
Blue	270	1.75	Developed	0.093	0.105	0.110	0.118	0.151	0.112	2.477E+5
Blue	270	1.75	Barren	0.104	0.130	0.147	0.164	0.219	0.143	9.962E+4
Blue	270	1.75	Wetlands	0.087	0.093	0.098	0.103	0.119	0.099	3.018E+4
Blue	270	1.75	ShrubScrub	0.094	0.103	0.108	0.115	0.134	0.110	6.432E+4
Blue	270	1.75	Forest	0.085	0.094	0.098	0.104	0.122	0.100	1.731E+4
Blue	270	1.75	All	0.093	0.103	0.109	0.116	0.135	0.110	2.930E+8
Blue	270	All	Grassland	0.096	0.109	0.117	0.124	0.143	0.116	1.570E+9
Blue	270	All	Cropland	0.094	0.110	0.119	0.129	0.149	0.119	2.680E+8
Blue	270	All	PastureHay	0.091	0.101	0.108	0.117	0.136	0.110	1.660E+7
Blue	270	All	Water	0.080	0.093	0.104	0.118	0.181	0.108	3.982E+6
Blue	270	All	Developed	0.096	0.109	0.117	0.126	0.154	0.118	2.181E+6
Blue	270	All	Barren	0.110	0.139	0.155	0.172	0.231	0.156	1.443E+6
Blue	270	All	Wetlands	0.086	0.095	0.102	0.109	0.129	0.103	2.046E+5
Blue	270	All	ShrubScrub	0.094	0.107	0.115	0.124	0.149	0.116	9.570E+5
Blue	270	All	Forest	0.086	0.097	0.104	0.111	0.131	0.103	2.031E+5
Blue	270	All	All	0.094	0.109	0.116	0.125	0.145	0.116	2.643E+9
Green	120	-1.75	Grassland	0.101	0.116	0.123	0.130	0.147	0.123	3.439E+7
Green	120	-1.75	Cropland	0.095	0.114	0.124	0.134	0.156	0.123	1.001E+7
Green	120	-1.75	PastureHay	0.093	0.106	0.113	0.122	0.143	0.114	8.204E+5
Green	120	-1.75	Water	0.068	0.089	0.108	0.122	0.171	0.110	1.101E+5
Green	120	-1.75	Developed	0.101	0.116	0.122	0.132	0.162	0.126	7.596E+4
Green	120	-1.75	Barren	0.116	0.143	0.166	0.186	0.259	0.168	1.712E+4
Green	120	-1.75	Wetlands	0.088	0.102	0.109	0.116	0.135	0.111	6.180E+3
Green	120	-1.75	ShrubScrub	0.101	0.116	0.123	0.132	0.151	0.126	1.255E+4
Green	120	-1.75	Forest	0.083	0.098	0.107	0.116	0.135	0.108	4.984E+3
Green	120	-1.75	All	0.097	0.114	0.122	0.130	0.150	0.122	6.840E+7
Green	120	-1.25	Grassland	0.105	0.120	0.127	0.133	0.151	0.125	8.949E+7
Green	120	-1.25	Cropland	0.095	0.116	0.127	0.137	0.165	0.126	2.007E+7
Green	120	-1.25	PastureHay	0.092	0.107	0.116	0.126	0.154	0.118	1.308E+6
Green	120	-1.25	Water	0.065	0.088	0.109	0.126	0.183	0.110	2.116E+5
Green	120	-1.25	Developed	0.102	0.114	0.122	0.131	0.165	0.125	1.270E+5
Green	120	-1.25	Barren	0.120	0.150	0.168	0.186	0.258	0.163	9.623E+4
Green	120	-1.25	Wetlands	0.083	0.101	0.110	0.118	0.137	0.111	8.118E+3
Green	120	-1.25	ShrubScrub	0.103	0.120	0.127	0.136	0.165	0.124	9.090E+4
Green	120	-1.25	Forest	0.089	0.104	0.113	0.122	0.141	0.111	9.536E+3
Green	120	-1.25	All	0.099	0.118	0.126	0.134	0.156	0.125	1.648E+8
Green	120	-0.75	Grassland	0.104	0.121	0.128	0.136	0.152	0.125	1.765E+8
Green	120	-0.75	Cropland	0.094	0.112	0.122	0.132	0.156	0.122	2.552E+7
Green	120	-0.75	PastureHay	0.091	0.106	0.116	0.125	0.149	0.116	1.718E+6
Green	120	-0.75	Water	0.065	0.101	0.119	0.133	0.193	0.113	3.756E+5
Green	120	-0.75	Developed	0.100	0.116	0.125	0.134	0.161	0.125	2.341E+5
Green	120	-0.75	Barren	0.113	0.145	0.165	0.186	0.265	0.169	2.029E+5
Green	120	-0.75	Wetlands	0.086	0.105	0.114	0.123	0.145	0.113	2.520E+4
Green	120	-0.75	ShrubScrub	0.105	0.121	0.130	0.139	0.167	0.126	1.147E+5
Green	120	-0.75	Forest	0.089	0.105	0.115	0.123	0.141	0.110	1.715E+4
Green	120	-0.75	All	0.099	0.118	0.127	0.135	0.154	0.124	2.882E+8
Green	120	-0.25	Grassland	0.101	0.115	0.123	0.130	0.148	0.123	2.339E+8
Green	120	-0.25	Cropland	0.093	0.113	0.123	0.133	0.158	0.122	3.522E+7
Green	120	-0.25	PastureHay	0.089	0.105	0.114	0.124	0.146	0.116	1.935E+6
Green	120	-0.25	Water	0.060	0.086	0.110	0.127	0.186	0.111	5.435E+5
Green	120	-0.25	Developed	0.099	0.114	0.123	0.134	0.166	0.125	3.298E+5
Green	120	-0.25	Barren	0.113	0.142	0.162	0.184	0.266	0.162	1.461E+5
Green	120	-0.25	Wetlands	0.087	0.102	0.111	0.120	0.141	0.111	4.537E+4
Green	120	-0.25	ShrubScrub	0.098	0.114	0.121	0.130	0.154	0.124	9.367E+4
Green	120	-0.25	Forest	0.086	0.099	0.108	0.118	0.135	0.110	2.890E+4
Green	120	-0.25	All	0.096	0.114	0.122	0.130	0.151	0.123	3.747E+8
Green	120	0.25	Grassland	0.100	0.114	0.121	0.129	0.148	0.121	1.588E+8
Green	120	0.25	Cropland	0.094	0.115	0.126	0.138	0.167	0.122	3.132E+7
Green	120	0.25	PastureHay	0.091	0.108	0.116	0.127	0.156	0.116	1.947E+6
Green	120	0.25	Water	0.060	0.090	0.111	0.128	0.193	0.110	3.538E+5
Green	120	0.25	Developed	0.098	0.114	0.123	0.132	0.169	0.124	2.421E+5
Green	120	0.25	Barren	0.114	0.142	0.163	0.189	0.295	0.168	1.322E+5
Green	120	0.25	Wetlands	0.088	0.104	0.111	0.119	0.139	0.111	1.654E+4
Green	120	0.25	ShrubScrub	0.100	0.114	0.121	0.129	0.156	0.123	6.151E+4
Green	120	0.25	Forest	0.085	0.101	0.110	0.121	0.138	0.111	2.254E+4
Green	120	0.25	All	0.096	0.113	0.121	0.130	0.156	0.121	2.718E+8
Green	120	0.75	Grassland	0.098	0.113	0.121	0.128	0.146	0.119	1.310E+8
Green	120	0.75	Cropland	0.090	0.110	0.121	0.132	0.157	0.120	2.391E+7
Green	120	0.75	PastureHay	0.091	0.105	0.113	0.123	0.147	0.112	1.133E+6
Green	120	0.75	Water	0.056	0.091	0.111	0.126	0.185	0.108	3.150E+5
Green	120	0.75	Developed	0.096	0.111	0.119	0.128	0.163	0.121	1.963E+5
Green	120	0.75	Barren	0.106	0.135	0.156	0.177	0.255	0.159	1.495E+5
Green	120	0.75	Wetlands	0.086	0.101	0.110	0.118	0.158	0.109	2.323E+4
Green	120	0.75	ShrubScrub	0.097	0.113	0.120	0.128	0.152	0.120	8.897E+4
Green	120	0.75	Forest	0.084	0.100	0.109	0.118	0.132	0.108	2.008E+4
Green	120	0.75	All	0.094	0.112	0.120	0.129	0.151	0.119	2.232E+8
Green	120	1.25	Grassland	0.094	0.108	0.115	0.122	0.140	0.115	2.415E+8
Green	120	1.25	Cropland	0.086	0.107	0.117	0.129	0.158	0.118	4.188E+7
Green	120	1.25	PastureHay	0.089	0.104	0.112	0.120	0.143	0.110	2.304E+6
Green	120	1.25	Water	0.060	0.082	0.104	0.121	0.172	0.103	6.406E+5
Green	120	1.25	Developed	0.093	0.109	0.117	0.127	0.163	0.119	3.339E+5
Green	120	1.25	Barren	0.103	0.137	0.156	0.176	0.249	0.161	1.577E+5
Green	120	1.25	Wetlands	0.080	0.097	0.106	0.114	0.139	0.105	3.436E+4
Green	120	1.25	ShrubScrub	0.094	0.109	0.115	0.123	0.148	0.116	1.279E+5
Green	120	1.25	Forest	0.083	0.098	0.106	0.114	0.134	0.103	3.027E+4
Green	120	1.25	All	0.090	0.107	0.115	0.123	0.146	0.115	4.044E+8
Green	120	1.75	Grassland	0.091	0.107	0.116	0.124	0.143	0.116	1.409E+8
Green	120	1.75	Cropland	0.085	0.106	0.118	0.130	0.159	0.118	2.247E+7
Green	120	1.75	PastureHay	0.084	0.099	0.110	0.121	0.147	0.111	1.404E+6
Green	120	1.75	Water	0.062	0.079	0.100	0.119	0.162	0.104	4.093E+5
Green	120	1.75	Developed	0.091	0.108	0.117	0.129	0.167	0.121	2.128E+5
Green	120	1.75	Barren	0.107	0.136	0.158	0.181	0.268	0.161	1.147E+5
Green	120	1.75	Wetlands	0.078	0.094	0.104	0.113	0.133	0.105	2.372E+4
Green	120	1.75	ShrubScrub	0.095	0.111	0.119	0.127	0.149	0.116	5.124E+4
Green	120	1.75	Forest	0.081	0.095	0.104	0.113	0.131	0.107	1.362E+4
Green	120	1.75	All	0.088	0.107	0.116	0.125	0.149	0.116	2.316E+8
Green	120	All	Grassland	0.097	0.113	0.121	0.129	0.148	0.120	1.206E+9
Green	120	All	Cropland	0.090	0.111	0.122	0.133	0.161	0.121	2.104E+8
Green	120	All	PastureHay	0.089	0.105	0.114	0.124	0.149	0.114	1.257E+7
Green	120	All	Water	0.060	0.087	0.109	0.126	0.182	0.108	2.959E+6
Green	120	All	Developed	0.096	0.112	0.121	0.131	0.165	0.123	1.752E+6
Green	120	All	Barren	0.109	0.140	0.161	0.183	0.266	0.164	1.016E+6
Green	120	All	Wetlands	0.083	0.100	0.109	0.118	0.142	0.109	1.827E+5
Green	120	All	ShrubScrub	0.097	0.113	0.121	0.131	0.157	0.122	6.414E+5
Green	120	All	Forest	0.084	0.100	0.109	0.118	0.137	0.108	1.471E+5
Green	120	All	All	0.093	0.112	0.120	0.129	0.152	0.120	2.027E+9
Green	130	-1.75	Grassland	0.104	0.118	0.124	0.131	0.148	0.123	3.748E+7
Green	130	-1.75	Cropland	0.097	0.114	0.124	0.133	0.156	0.123	1.056E+7
Green	130	-1.75	PastureHay	0.092	0.107	0.114	0.124	0.144	0.114	8.858E+5
Green	130	-1.75	Water	0.068	0.087	0.108	0.123	0.169	0.112	1.134E+5
Green	130	-1.75	Developed	0.100	0.115	0.122	0.131	0.163	0.125	8.082E+4
Green	130	-1.75	Barren	0.116	0.143	0.167	0.189	0.264	0.174	2.142E+4
Green	130	-1.75	Wetlands	0.086	0.104	0.111	0.118	0.137	0.111	6.502E+3
Green	130	-1.75	ShrubScrub	0.102	0.116	0.123	0.132	0.152	0.126	1.257E+4
Green	130	-1.75	Forest	0.085	0.100	0.109	0.118	0.136	0.108	5.346E+3
Green	130	-1.75	All	0.098	0.116	0.123	0.131	0.151	0.122	7.350E+7
Green	130	-1.25	Grassland	0.101	0.116	0.125	0.133	0.152	0.123	1.279E+8
Green	130	-1.25	Cropland	0.094	0.115	0.126	0.137	0.165	0.125	2.683E+7
Green	130	-1.25	PastureHay	0.086	0.103	0.114	0.125	0.154	0.115	1.711E+6
Green	130	-1.25	Water	0.063	0.088	0.110	0.127	0.196	0.110	3.135E+5
Green	130	-1.25	Developed	0.100	0.114	0.122	0.132	0.167	0.124	1.796E+5
Green	130	-1.25	Barren	0.118	0.151	0.168	0.189	0.258	0.167	1.278E+5
Green	130	-1.25	Wetlands	0.084	0.099	0.107	0.117	0.137	0.110	1.319E+4
Green	130	-1.25	ShrubScrub	0.097	0.117	0.126	0.135	0.164	0.124	1.141E+5
Green	130	-1.25	Forest	0.082	0.096	0.106	0.118	0.138	0.108	1.628E+4
Green	130	-1.25	All	0.096	0.114	0.124	0.133	0.156	0.123	2.301E+8
Green	130	-0.75	Grassland	0.095	0.115	0.125	0.134	0.152	0.123	2.353E+8
Green	130	-0.75	Cropland	0.089	0.111	0.121	0.131	0.156	0.121	3.760E+7
Green	130	-0.75	PastureHay	0.085	0.103	0.113	0.124	0.148	0.114	2.570E+6
Green	130	-0.75	Water	0.064	0.097	0.117	0.133	0.197	0.113	5.356E+5
Green	130	-0.75	Developed	0.095	0.112	0.123	0.133	0.161	0.124	3.138E+5
Green	130	-0.75	Barren	0.116	0.149	0.168	0.189	0.260	0.170	2.576E+5
Green	130	-0.75	Wetlands	0.083	0.100	0.112	0.122	0.146	0.110	3.079E+4
Green	130	-0.75	ShrubScrub	0.100	0.117	0.127	0.138	0.168	0.124	1.577E+5
Green	130	-0.75	Forest	0.083	0.101	0.113	0.123	0.140	0.108	2.394E+4
Green	130	-0.75	All	0.092	0.113	0.124	0.133	0.153	0.122	3.932E+8
Green	130	-0.25	Grassland	0.096	0.111	0.120	0.129	0.148	0.121	2.620E+8
Green	130	-0.25	Cropland	0.091	0.111	0.122	0.133	0.159	0.122	4.348E+7
Green	130	-0.25	PastureHay	0.086	0.102	0.111	0.123	0.146	0.114	2.518E+6
Green	130	-0.25	Water	0.060	0.085	0.106	0.124	0.182	0.110	6.635E+5
Green	130	-0.25	Developed	0.095	0.111	0.121	0.132	0.166	0.124	4.033E+5
Green	130	-0.25	Barren	0.110	0.139	0.161	0.184	0.263	0.165	1.959E+5
Green	130	-0.25	Wetlands	0.082	0.098	0.107	0.118	0.140	0.109	4.762E+4
Green	130	-0.25	ShrubScrub	0.095	0.110	0.119	0.129	0.155	0.122	1.214E+5
Green	130	-0.25	Forest	0.082	0.098	0.107	0.116	0.134	0.108	3.229E+4
Green	130	-0.25	All	0.092	0.110	0.119	0.129	0.151	0.121	4.324E+8
Green	130	0.25	Grassland	0.096	0.110	0.119	0.128	0.148	0.119	1.768E+8
Green	130	0.25	Cropland	0.091	0.113	0.125	0.136	0.164	0.122	3.507E+7
Green	130	0.25	PastureHay	0.087	0.104	0.113	0.124	0.152	0.113	2.332E+6
Green	130	0.25	Water	0.060	0.083	0.107	0.126	0.200	0.109	4.105E+5
Green	130	0.25	Developed	0.096	0.111	0.121	0.131	0.168	0.122	2.695E+5
Green	130	0.25	Barren	0.112	0.142	0.163	0.189	0.300	0.172	1.414E+5
Green	130	0.25	Wetlands	0.082	0.098	0.107	0.117	0.138	0.109	1.821E+4
Green	130	0.25	ShrubScrub	0.097	0.112	0.120	0.128	0.156	0.121	7.757E+4
Green	130	0.25	Forest	0.082	0.098	0.107	0.118	0.138	0.107	2.374E+4
Green	130	0.25	All	0.092	0.110	0.119	0.129	0.154	0.119	3.050E+8
Green	130	0.75	Grassland	0.094	0.110	0.119	0.127	0.146	0.115	1.606E+8
Green	130	0.75	Cropland	0.087	0.109	0.119	0.130	0.156	0.118	2.946E+7
Green	130	0.75	PastureHay	0.086	0.101	0.111	0.121	0.145	0.109	1.442E+6
Green	130	0.75	Water	0.056	0.091	0.111	0.126	0.185	0.105	3.766E+5
Green	130	0.75	Developed	0.094	0.110	0.118	0.128	0.165	0.118	2.418E+5
Green	130	0.75	Barren	0.104	0.133	0.153	0.176	0.245	0.156	1.877E+5
Green	130	0.75	Wetlands	0.085	0.099	0.108	0.118	0.159	0.106	3.082E+4
Green	130	0.75	ShrubScrub	0.096	0.112	0.120	0.129	0.153	0.118	1.047E+5
Green	130	0.75	Forest	0.085	0.097	0.105	0.114	0.133	0.105	2.429E+4
Green	130	0.75	All	0.091	0.109	0.118	0.128	0.149	0.116	2.741E+8
Green	130	1.25	Grassland	0.089	0.106	0.113	0.120	0.139	0.114	2.753E+8
Green	130	1.25	Cropland	0.082	0.106	0.116	0.128	0.157	0.118	4.568E+7
Green	130	1.25	PastureHay	0.086	0.103	0.111	0.119	0.143	0.109	2.592E+6
Green	130	1.25	Water	0.058	0.080	0.101	0.119	0.171	0.101	7.474E+5
Green	130	1.25	Developed	0.090	0.108	0.116	0.126	0.165	0.118	3.682E+5
Green	130	1.25	Barren	0.101	0.135	0.154	0.175	0.252	0.161	1.912E+5
Green	130	1.25	Wetlands	0.077	0.094	0.104	0.114	0.138	0.103	3.740E+4
Green	130	1.25	ShrubScrub	0.091	0.106	0.114	0.122	0.148	0.115	1.557E+5
Green	130	1.25	Forest	0.081	0.095	0.104	0.112	0.132	0.102	3.342E+4
Green	130	1.25	All	0.086	0.105	0.113	0.121	0.146	0.114	4.587E+8
Green	130	1.75	Grassland	0.091	0.107	0.115	0.124	0.143	0.114	1.407E+8
Green	130	1.75	Cropland	0.084	0.108	0.120	0.131	0.161	0.117	2.074E+7
Green	130	1.75	PastureHay	0.084	0.099	0.110	0.122	0.147	0.110	1.325E+6
Green	130	1.75	Water	0.061	0.079	0.101	0.122	0.166	0.104	3.859E+5
Green	130	1.75	Developed	0.089	0.108	0.117	0.129	0.167	0.120	2.098E+5
Green	130	1.75	Barren	0.106	0.137	0.158	0.181	0.267	0.163	1.119E+5
Green	130	1.75	Wetlands	0.080	0.092	0.103	0.112	0.134	0.104	2.546E+4
Green	130	1.75	ShrubScrub	0.094	0.110	0.118	0.127	0.150	0.115	5.086E+4
Green	130	1.75	Forest	0.081	0.095	0.104	0.113	0.131	0.105	1.349E+4
Green	130	1.75	All	0.088	0.106	0.116	0.125	0.149	0.114	2.267E+8
Green	130	All	Grassland	0.093	0.110	0.119	0.128	0.148	0.118	1.416E+9
Green	130	All	Cropland	0.088	0.110	0.121	0.132	0.159	0.121	2.494E+8
Green	130	All	PastureHay	0.086	0.102	0.112	0.122	0.148	0.112	1.537E+7
Green	130	All	Water	0.060	0.085	0.107	0.125	0.186	0.107	3.546E+6
Green	130	All	Developed	0.093	0.110	0.120	0.130	0.165	0.122	2.067E+6
Green	130	All	Barren	0.108	0.140	0.161	0.183	0.265	0.165	1.235E+6
Green	130	All	Wetlands	0.080	0.097	0.107	0.117	0.142	0.107	2.100E+5
Green	130	All	ShrubScrub	0.095	0.111	0.120	0.130	0.158	0.120	7.946E+5
Green	130	All	Forest	0.082	0.097	0.106	0.116	0.136	0.106	1.728E+5
Green	130	All	All	0.090	0.109	0.119	0.128	0.151	0.119	2.394E+9
Green	140	-1.75	Grassland	0.101	0.118	0.125	0.134	0.151	0.122	5.870E+7
Green	140	-1.75	Cropland	0.084	0.108	0.118	0.129	0.154	0.120	1.180E+7
Green	140	-1.75	PastureHay	0.087	0.105	0.113	0.122	0.142	0.112	1.002E+6
Green	140	-1.75	Water	0.067	0.094	0.112	0.128	0.166	0.111	1.673E+5
Green	140	-1.75	Developed	0.098	0.114	0.122	0.131	0.159	0.124	1.058E+5
Green	140	-1.75	Barren	0.118	0.146	0.162	0.181	0.246	0.177	3.111E+4
Green	140	-1.75	Wetlands	0.079	0.098	0.107	0.115	0.141	0.108	1.006E+4
Green	140	-1.75	ShrubScrub	0.103	0.117	0.126	0.135	0.153	0.125	1.928E+4
Green	140	-1.75	Forest	0.083	0.099	0.107	0.113	0.132	0.106	5.508E+3
Green	140	-1.75	All	0.094	0.115	0.124	0.132	0.153	0.121	1.029E+8
Green	140	-1.25	Grassland	0.099	0.113	0.122	0.130	0.151	0.120	1.263E+8
Green	140	-1.25	Cropland	0.091	0.113	0.125	0.137	0.165	0.123	2.291E+7
Green	140	-1.25	PastureHay	0.086	0.100	0.111	0.124	0.156	0.112	1.318E+6
Green	140	-1.25	Water	0.061	0.094	0.113	0.129	0.206	0.111	2.908E+5
Green	140	-1.25	Developed	0.098	0.112	0.121	0.131	0.168	0.122	1.621E+5
Green	140	-1.25	Barren	0.118	0.150	0.169	0.190	0.263	0.169	1.437E+5
Green	140	-1.25	Wetlands	0.082	0.096	0.103	0.112	0.136	0.107	1.553E+4
Green	140	-1.25	ShrubScrub	0.094	0.114	0.124	0.133	0.163	0.122	1.221E+5
Green	140	-1.25	Forest	0.080	0.094	0.103	0.114	0.136	0.105	2.043E+4
Green	140	-1.25	All	0.094	0.112	0.122	0.131	0.156	0.120	2.204E+8
Green	140	-0.75	Grassland	0.095	0.109	0.118	0.129	0.149	0.118	1.938E+8
Green	140	-0.75	Cropland	0.087	0.107	0.118	0.129	0.155	0.120	3.202E+7
Green	140	-0.75	PastureHay	0.083	0.101	0.111	0.122	0.147	0.111	2.153E+6
Green	140	-0.75	Water	0.064	0.094	0.111	0.127	0.198	0.110	4.559E+5
Green	140	-0.75	Developed	0.092	0.109	0.119	0.130	0.162	0.122	2.708E+5
Green	140	-0.75	Barren	0.116	0.147	0.167	0.187	0.258	0.171	2.267E+5
Green	140	-0.75	Wetlands	0.080	0.094	0.107	0.119	0.145	0.106	2.784E+4
Green	140	-0.75	ShrubScrub	0.095	0.112	0.123	0.136	0.165	0.122	1.346E+5
Green	140	-0.75	Forest	0.082	0.092	0.104	0.117	0.138	0.105	2.222E+4
Green	140	-0.75	All	0.091	0.109	0.117	0.128	0.152	0.119	3.266E+8
Green	140	-0.25	Grassland	0.094	0.109	0.117	0.126	0.147	0.117	2.182E+8
Green	140	-0.25	Cropland	0.087	0.109	0.121	0.132	0.159	0.120	3.870E+7
Green	140	-0.25	PastureHay	0.085	0.099	0.108	0.120	0.146	0.108	2.177E+6
Green	140	-0.25	Water	0.059	0.083	0.103	0.122	0.178	0.107	5.923E+5
Green	140	-0.25	Developed	0.092	0.109	0.118	0.130	0.166	0.119	3.603E+5
Green	140	-0.25	Barren	0.110	0.140	0.161	0.185	0.277	0.170	1.732E+5
Green	140	-0.25	Wetlands	0.082	0.095	0.104	0.114	0.139	0.106	3.734E+4
Green	140	-0.25	ShrubScrub	0.094	0.109	0.117	0.127	0.156	0.119	9.821E+4
Green	140	-0.25	Forest	0.080	0.096	0.104	0.114	0.133	0.103	2.890E+4
Green	140	-0.25	All	0.089	0.108	0.116	0.126	0.151	0.117	3.664E+8
Green	140	0.25	Grassland	0.091	0.107	0.114	0.123	0.145	0.114	1.537E+8
Green	140	0.25	Cropland	0.085	0.110	0.123	0.135	0.164	0.120	2.861E+7
Green	140	0.25	PastureHay	0.085	0.100	0.110	0.121	0.153	0.109	1.949E+6
Green	140	0.25	Water	0.060	0.082	0.104	0.124	0.197	0.103	3.608E+5
Green	140	0.25	Developed	0.092	0.108	0.117	0.128	0.167	0.119	2.241E+5
Green	140	0.25	Barren	0.110	0.140	0.160	0.188	0.300	0.168	1.088E+5
Green	140	0.25	Wetlands	0.076	0.090	0.100	0.111	0.134	0.104	2.161E+4
Green	140	0.25	ShrubScrub	0.092	0.109	0.117	0.126	0.155	0.118	7.937E+4
Green	140	0.25	Forest	0.079	0.094	0.102	0.111	0.135	0.103	1.772E+4
Green	140	0.25	All	0.088	0.107	0.115	0.125	0.153	0.115	2.614E+8
Green	140	0.75	Grassland	0.088	0.104	0.112	0.124	0.146	0.111	1.202E+8
Green	140	0.75	Cropland	0.084	0.107	0.119	0.131	0.158	0.116	2.016E+7
Green	140	0.75	PastureHay	0.082	0.097	0.106	0.117	0.143	0.106	9.997E+5
Green	140	0.75	Water	0.053	0.082	0.106	0.123	0.179	0.103	2.810E+5
Green	140	0.75	Developed	0.089	0.106	0.115	0.127	0.164	0.116	1.722E+5
Green	140	0.75	Barren	0.094	0.125	0.146	0.173	0.247	0.151	1.806E+5
Green	140	0.75	Wetlands	0.082	0.096	0.103	0.115	0.161	0.101	2.280E+4
Green	140	0.75	ShrubScrub	0.088	0.106	0.117	0.127	0.155	0.114	8.535E+4
Green	140	0.75	Forest	0.081	0.094	0.102	0.110	0.131	0.100	2.067E+4
Green	140	0.75	All	0.085	0.103	0.113	0.125	0.149	0.111	2.034E+8
Green	140	1.25	Grassland	0.084	0.101	0.110	0.117	0.138	0.109	2.645E+8
Green	140	1.25	Cropland	0.079	0.103	0.115	0.127	0.158	0.117	4.106E+7
Green	140	1.25	PastureHay	0.080	0.098	0.107	0.118	0.143	0.105	2.209E+6
Green	140	1.25	Water	0.056	0.081	0.101	0.119	0.181	0.101	6.701E+5
Green	140	1.25	Developed	0.086	0.105	0.113	0.124	0.164	0.115	3.323E+5
Green	140	1.25	Barren	0.095	0.131	0.151	0.173	0.251	0.155	2.139E+5
Green	140	1.25	Wetlands	0.076	0.090	0.100	0.110	0.136	0.098	3.522E+4
Green	140	1.25	ShrubScrub	0.085	0.101	0.110	0.120	0.148	0.110	1.618E+5
Green	140	1.25	Forest	0.078	0.090	0.100	0.109	0.131	0.098	3.386E+4
Green	140	1.25	All	0.081	0.101	0.110	0.119	0.145	0.110	4.345E+8
Green	140	1.75	Grassland	0.085	0.101	0.110	0.120	0.141	0.110	1.590E+8
Green	140	1.75	Cropland	0.081	0.104	0.117	0.129	0.157	0.116	2.715E+7
Green	140	1.75	PastureHay	0.079	0.094	0.104	0.116	0.143	0.107	1.775E+6
Green	140	1.75	Water	0.058	0.077	0.100	0.121	0.167	0.103	4.205E+5
Green	140	1.75	Developed	0.084	0.102	0.112	0.124	0.164	0.116	2.437E+5
Green	140	1.75	Barren	0.101	0.136	0.157	0.181	0.277	0.161	1.209E+5
Green	140	1.75	Wetlands	0.077	0.090	0.100	0.111	0.133	0.101	2.763E+4
Green	140	1.75	ShrubScrub	0.087	0.104	0.112	0.122	0.149	0.112	6.216E+4
Green	140	1.75	Forest	0.077	0.092	0.101	0.111	0.131	0.101	1.385E+4
Green	140	1.75	All	0.083	0.101	0.110	0.121	0.147	0.111	2.632E+8
Green	140	All	Grassland	0.088	0.106	0.115	0.125	0.147	0.114	1.294E+9
Green	140	All	Cropland	0.083	0.107	0.119	0.131	0.159	0.119	2.224E+8
Green	140	All	PastureHay	0.082	0.099	0.108	0.120	0.147	0.108	1.358E+7
Green	140	All	Water	0.058	0.084	0.106	0.124	0.186	0.106	3.239E+6
Green	140	All	Developed	0.089	0.107	0.117	0.128	0.164	0.119	1.871E+6
Green	140	All	Barren	0.103	0.138	0.160	0.183	0.266	0.164	1.199E+6
Green	140	All	Wetlands	0.078	0.093	0.103	0.113	0.140	0.103	1.980E+5
Green	140	All	ShrubScrub	0.089	0.107	0.117	0.128	0.157	0.117	7.629E+5
Green	140	All	Forest	0.079	0.093	0.102	0.112	0.134	0.102	1.631E+5
Green	140	All	All	0.086	0.106	0.115	0.126	0.151	0.115	2.179E+9
Green	150	-1.75	Grassland	0.102	0.119	0.126	0.136	0.152	0.123	6.127E+7
Green	150	-1.75	Cropland	0.084	0.109	0.120	0.131	0.156	0.122	1.127E+7
Green	150	-1.75	PastureHay	0.088	0.105	0.114	0.123	0.142	0.116	9.567E+5
Green	150	-1.75	Water	0.067	0.095	0.113	0.130	0.166	0.111	1.640E+5
Green	150	-1.75	Developed	0.099	0.115	0.124	0.132	0.162	0.126	9.887E+4
Green	150	-1.75	Barren	0.119	0.147	0.164	0.183	0.260	0.183	4.295E+4
Green	150	-1.75	Wetlands	0.079	0.096	0.105	0.115	0.143	0.107	8.697E+3
Green	150	-1.75	ShrubScrub	0.103	0.118	0.126	0.136	0.157	0.125	2.694E+4
Green	150	-1.75	Forest	0.084	0.099	0.108	0.117	0.139	0.105	4.202E+3
Green	150	-1.75	All	0.094	0.117	0.125	0.134	0.153	0.122	1.053E+8
Green	150	-1.25	Grassland	0.097	0.111	0.120	0.127	0.149	0.119	1.244E+8
Green	150	-1.25	Cropland	0.089	0.110	0.122	0.135	0.165	0.121	2.289E+7
Green	150	-1.25	PastureHay	0.084	0.099	0.110	0.122	0.154	0.111	1.368E+6
Green	150	-1.25	Water	0.061	0.094	0.112	0.129	0.218	0.111	2.893E+5
Green	150	-1.25	Developed	0.097	0.111	0.120	0.130	0.167	0.122	1.718E+5
Green	150	-1.25	Barren	0.115	0.148	0.167	0.190	0.269	0.169	1.271E+5
Green	150	-1.25	Wetlands	0.081	0.095	0.102	0.111	0.135	0.105	1.698E+4
Green	150	-1.25	ShrubScrub	0.094	0.112	0.121	0.130	0.159	0.121	1.001E+5
Green	150	-1.25	Forest	0.076	0.090	0.100	0.109	0.132	0.102	2.048E+4
Green	150	-1.25	All	0.092	0.110	0.119	0.128	0.155	0.119	2.159E+8
Green	150	-0.75	Grassland	0.088	0.107	0.116	0.125	0.146	0.114	1.722E+8
Green	150	-0.75	Cropland	0.079	0.102	0.114	0.127	0.154	0.116	3.080E+7
Green	150	-0.75	PastureHay	0.073	0.091	0.104	0.116	0.142	0.106	2.025E+6
Green	150	-0.75	Water	0.062	0.089	0.108	0.126	0.207	0.107	4.235E+5
Green	150	-0.75	Developed	0.084	0.105	0.115	0.126	0.164	0.119	2.433E+5
Green	150	-0.75	Barren	0.112	0.147	0.170	0.194	0.268	0.168	1.995E+5
Green	150	-0.75	Wetlands	0.075	0.088	0.097	0.108	0.134	0.099	2.230E+4
Green	150	-0.75	ShrubScrub	0.095	0.112	0.121	0.132	0.167	0.117	1.206E+5
Green	150	-0.75	Forest	0.078	0.095	0.105	0.115	0.136	0.101	2.170E+4
Green	150	-0.75	All	0.082	0.105	0.115	0.125	0.150	0.114	2.940E+8
Green	150	-0.25	Grassland	0.090	0.107	0.114	0.122	0.144	0.111	1.717E+8
Green	150	-0.25	Cropland	0.082	0.103	0.116	0.129	0.159	0.115	3.030E+7
Green	150	-0.25	PastureHay	0.078	0.096	0.105	0.116	0.143	0.103	1.809E+6
Green	150	-0.25	Water	0.062	0.086	0.103	0.123	0.189	0.105	4.829E+5
Green	150	-0.25	Developed	0.089	0.107	0.115	0.126	0.163	0.115	2.789E+5
Green	150	-0.25	Barren	0.109	0.140	0.164	0.189	0.255	0.164	1.769E+5
Green	150	-0.25	Wetlands	0.078	0.091	0.099	0.108	0.135	0.100	2.870E+4
Green	150	-0.25	ShrubScrub	0.090	0.107	0.114	0.123	0.154	0.115	1.117E+5
Green	150	-0.25	Forest	0.079	0.093	0.100	0.107	0.129	0.098	2.548E+4
Green	150	-0.25	All	0.085	0.105	0.113	0.122	0.149	0.112	2.934E+8
Green	150	0.25	Grassland	0.084	0.103	0.111	0.120	0.143	0.110	1.396E+8
Green	150	0.25	Cropland	0.079	0.106	0.120	0.134	0.163	0.117	2.355E+7
Green	150	0.25	PastureHay	0.079	0.096	0.106	0.119	0.152	0.105	1.643E+6
Green	150	0.25	Water	0.060	0.076	0.099	0.119	0.189	0.100	3.531E+5
Green	150	0.25	Developed	0.086	0.105	0.114	0.126	0.166	0.115	2.046E+5
Green	150	0.25	Barren	0.106	0.137	0.158	0.185	0.300	0.161	1.242E+5
Green	150	0.25	Wetlands	0.075	0.087	0.097	0.107	0.130	0.100	2.192E+4
Green	150	0.25	ShrubScrub	0.086	0.105	0.114	0.124	0.153	0.115	9.462E+4
Green	150	0.25	Forest	0.075	0.090	0.098	0.108	0.132	0.098	1.712E+4
Green	150	0.25	All	0.082	0.103	0.112	0.122	0.151	0.111	2.368E+8
Green	150	0.75	Grassland	0.084	0.098	0.108	0.119	0.145	0.106	1.361E+8
Green	150	0.75	Cropland	0.079	0.101	0.115	0.129	0.157	0.112	2.336E+7
Green	150	0.75	PastureHay	0.076	0.093	0.103	0.115	0.142	0.100	1.283E+6
Green	150	0.75	Water	0.056	0.081	0.104	0.122	0.173	0.105	3.072E+5
Green	150	0.75	Developed	0.084	0.103	0.111	0.124	0.161	0.112	1.791E+5
Green	150	0.75	Barren	0.095	0.128	0.148	0.173	0.254	0.151	1.849E+5
Green	150	0.75	Wetlands	0.070	0.087	0.099	0.112	0.159	0.098	1.940E+4
Green	150	0.75	ShrubScrub	0.084	0.101	0.113	0.123	0.151	0.108	9.975E+4
Green	150	0.75	Forest	0.076	0.091	0.099	0.108	0.130	0.097	1.966E+4
Green	150	0.75	All	0.081	0.098	0.109	0.121	0.148	0.107	2.314E+8
Green	150	1.25	Grassland	0.081	0.095	0.104	0.112	0.134	0.103	2.496E+8
Green	150	1.25	Cropland	0.076	0.099	0.114	0.128	0.159	0.112	3.623E+7
Green	150	1.25	PastureHay	0.078	0.092	0.101	0.113	0.142	0.101	2.112E+6
Green	150	1.25	Water	0.055	0.080	0.098	0.117	0.173	0.101	6.024E+5
Green	150	1.25	Developed	0.081	0.099	0.109	0.121	0.163	0.110	3.000E+5
Green	150	1.25	Barren	0.093	0.129	0.148	0.170	0.251	0.153	2.167E+5
Green	150	1.25	Wetlands	0.072	0.084	0.092	0.104	0.129	0.094	3.246E+4
Green	150	1.25	ShrubScrub	0.084	0.098	0.106	0.116	0.144	0.106	1.561E+5
Green	150	1.25	Forest	0.074	0.086	0.093	0.103	0.127	0.094	3.102E+4
Green	150	1.25	All	0.078	0.095	0.104	0.115	0.145	0.104	4.056E+8
Green	150	1.75	Grassland	0.082	0.094	0.101	0.110	0.133	0.101	1.246E+8
Green	150	1.75	Cropland	0.077	0.095	0.109	0.124	0.154	0.110	2.543E+7
Green	150	1.75	PastureHay	0.076	0.089	0.099	0.110	0.140	0.099	1.760E+6
Green	150	1.75	Water	0.055	0.074	0.094	0.115	0.160	0.097	3.888E+5
Green	150	1.75	Developed	0.080	0.095	0.104	0.116	0.159	0.109	2.199E+5
Green	150	1.75	Barren	0.095	0.126	0.144	0.168	0.244	0.150	7.440E+4
Green	150	1.75	Wetlands	0.076	0.086	0.092	0.105	0.127	0.093	2.275E+4
Green	150	1.75	ShrubScrub	0.084	0.097	0.105	0.114	0.142	0.103	5.233E+4
Green	150	1.75	Forest	0.076	0.086	0.093	0.101	0.123	0.092	9.305E+3
Green	150	1.75	All	0.079	0.092	0.102	0.111	0.142	0.103	2.170E+8
Green	150	All	Grassland	0.084	0.101	0.111	0.121	0.144	0.109	1.180E+9
Green	150	All	Cropland	0.079	0.102	0.116	0.129	0.159	0.115	2.038E+8
Green	150	All	PastureHay	0.076	0.094	0.104	0.117	0.145	0.104	1.296E+7
Green	150	All	Water	0.058	0.082	0.103	0.122	0.188	0.104	3.011E+6
Green	150	All	Developed	0.084	0.103	0.113	0.125	0.163	0.115	1.696E+6
Green	150	All	Barren	0.101	0.135	0.157	0.182	0.261	0.161	1.147E+6
Green	150	All	Wetlands	0.074	0.088	0.097	0.108	0.136	0.099	1.732E+5
Green	150	All	ShrubScrub	0.086	0.104	0.114	0.124	0.154	0.113	7.622E+5
Green	150	All	Forest	0.076	0.089	0.098	0.107	0.131	0.098	1.490E+5
Green	150	All	All	0.081	0.100	0.111	0.122	0.149	0.110	2.000E+9
Green	160	-1.75	Grassland	0.101	0.119	0.126	0.134	0.151	0.124	7.136E+7
Green	160	-1.75	Cropland	0.083	0.107	0.117	0.128	0.153	0.121	1.104E+7
Green	160	-1.75	PastureHay	0.086	0.102	0.111	0.120	0.139	0.113	8.280E+5
Green	160	-1.75	Water	0.067	0.094	0.113	0.128	0.167	0.114	1.893E+5
Green	160	-1.75	Developed	0.096	0.115	0.123	0.133	0.166	0.125	1.041E+5
Green	160	-1.75	Barren	0.119	0.147	0.166	0.187	0.276	0.181	6.076E+4
Green	160	-1.75	Wetlands	0.079	0.095	0.103	0.112	0.139	0.104	1.215E+4
Green	160	-1.75	ShrubScrub	0.100	0.117	0.124	0.136	0.157	0.122	3.962E+4
Green	160	-1.75	Forest	0.081	0.097	0.105	0.115	0.139	0.103	6.330E+3
Green	160	-1.75	All	0.092	0.115	0.124	0.134	0.153	0.122	1.183E+8
Green	160	-1.25	Grassland	0.094	0.112	0.120	0.128	0.150	0.116	1.258E+8
Green	160	-1.25	Cropland	0.081	0.105	0.117	0.129	0.159	0.116	2.161E+7
Green	160	-1.25	PastureHay	0.081	0.099	0.111	0.123	0.148	0.106	1.179E+6
Green	160	-1.25	Water	0.063	0.095	0.113	0.131	0.222	0.109	2.783E+5
Green	160	-1.25	Developed	0.094	0.112	0.121	0.131	0.165	0.120	1.691E+5
Green	160	-1.25	Barren	0.118	0.151	0.173	0.199	0.281	0.172	1.289E+5
Green	160	-1.25	Wetlands	0.080	0.093	0.100	0.110	0.136	0.103	1.729E+4
Green	160	-1.25	ShrubScrub	0.096	0.112	0.120	0.129	0.159	0.120	8.249E+4
Green	160	-1.25	Forest	0.078	0.092	0.100	0.108	0.128	0.098	2.410E+4
Green	160	-1.25	All	0.087	0.109	0.119	0.128	0.154	0.116	2.115E+8
Green	160	-0.75	Grassland	0.088	0.106	0.113	0.122	0.144	0.111	1.498E+8
Green	160	-0.75	Cropland	0.078	0.099	0.111	0.124	0.153	0.114	2.807E+7
Green	160	-0.75	PastureHay	0.073	0.087	0.100	0.111	0.137	0.103	1.765E+6
Green	160	-0.75	Water	0.064	0.087	0.103	0.122	0.204	0.105	3.953E+5
Green	160	-0.75	Developed	0.083	0.103	0.112	0.124	0.165	0.117	2.079E+5
Green	160	-0.75	Barren	0.111	0.147	0.168	0.191	0.265	0.165	1.600E+5
Green	160	-0.75	Wetlands	0.072	0.086	0.094	0.103	0.129	0.096	1.708E+4
Green	160	-0.75	ShrubScrub	0.092	0.109	0.118	0.129	0.166	0.114	1.082E+5
Green	160	-0.75	Forest	0.075	0.091	0.099	0.108	0.131	0.096	1.739E+4
Green	160	-0.75	All	0.082	0.103	0.112	0.122	0.148	0.112	2.597E+8
Green	160	-0.25	Grassland	0.087	0.103	0.111	0.120	0.142	0.108	1.451E+8
Green	160	-0.25	Cropland	0.078	0.098	0.111	0.126	0.157	0.111	2.702E+7
Green	160	-0.25	PastureHay	0.076	0.088	0.099	0.111	0.140	0.099	1.660E+6
Green	160	-0.25	Water	0.059	0.087	0.104	0.122	0.190	0.102	3.911E+5
Green	160	-0.25	Developed	0.085	0.103	0.112	0.124	0.161	0.112	2.294E+5
Green	160	-0.25	Barren	0.106	0.139	0.161	0.187	0.246	0.163	1.913E+5
Green	160	-0.25	Wetlands	0.073	0.087	0.095	0.102	0.124	0.094	1.938E+4
Green	160	-0.25	ShrubScrub	0.087	0.104	0.113	0.124	0.154	0.111	1.327E+5
Green	160	-0.25	Forest	0.076	0.090	0.099	0.107	0.128	0.097	2.068E+4
Green	160	-0.25	All	0.082	0.101	0.110	0.120	0.147	0.108	2.565E+8
Green	160	0.25	Grassland	0.082	0.095	0.103	0.111	0.133	0.104	1.405E+8
Green	160	0.25	Cropland	0.075	0.094	0.108	0.124	0.156	0.109	2.220E+7
Green	160	0.25	PastureHay	0.074	0.087	0.096	0.104	0.132	0.098	1.304E+6
Green	160	0.25	Water	0.060	0.077	0.096	0.116	0.201	0.101	3.659E+5
Green	160	0.25	Developed	0.082	0.099	0.108	0.121	0.166	0.112	2.104E+5
Green	160	0.25	Barren	0.101	0.139	0.163	0.189	0.275	0.165	1.320E+5
Green	160	0.25	Wetlands	0.072	0.082	0.089	0.098	0.120	0.092	2.046E+4
Green	160	0.25	ShrubScrub	0.083	0.099	0.107	0.117	0.151	0.109	9.093E+4
Green	160	0.25	Forest	0.071	0.084	0.091	0.098	0.117	0.092	1.844E+4
Green	160	0.25	All	0.078	0.094	0.103	0.112	0.142	0.105	2.340E+8
Green	160	0.75	Grassland	0.081	0.094	0.101	0.109	0.131	0.101	1.583E+8
Green	160	0.75	Cropland	0.076	0.092	0.106	0.120	0.153	0.108	3.161E+7
Green	160	0.75	PastureHay	0.075	0.085	0.093	0.105	0.135	0.096	2.065E+6
Green	160	0.75	Water	0.056	0.074	0.090	0.111	0.170	0.097	3.883E+5
Green	160	0.75	Developed	0.082	0.098	0.108	0.120	0.170	0.110	2.413E+5
Green	160	0.75	Barren	0.092	0.125	0.148	0.173	0.249	0.157	1.668E+5
Green	160	0.75	Wetlands	0.068	0.083	0.091	0.099	0.122	0.091	2.286E+4
Green	160	0.75	ShrubScrub	0.083	0.096	0.105	0.116	0.148	0.104	1.119E+5
Green	160	0.75	Forest	0.072	0.085	0.093	0.100	0.118	0.091	1.806E+4
Green	160	0.75	All	0.078	0.093	0.101	0.110	0.142	0.102	2.799E+8
Green	160	1.25	Grassland	0.080	0.092	0.099	0.107	0.132	0.100	1.833E+8
Green	160	1.25	Cropland	0.074	0.092	0.110	0.126	0.159	0.108	2.755E+7
Green	160	1.25	PastureHay	0.076	0.089	0.098	0.112	0.142	0.097	1.640E+6
Green	160	1.25	Water	0.055	0.073	0.089	0.108	0.165	0.097	4.633E+5
Green	160	1.25	Developed	0.081	0.096	0.105	0.117	0.157	0.108	2.222E+5
Green	160	1.25	Barren	0.095	0.131	0.153	0.170	0.243	0.155	1.985E+5
Green	160	1.25	Wetlands	0.068	0.080	0.087	0.095	0.122	0.089	2.346E+4
Green	160	1.25	ShrubScrub	0.081	0.093	0.101	0.112	0.144	0.103	1.354E+5
Green	160	1.25	Forest	0.073	0.084	0.090	0.098	0.125	0.091	2.365E+4
Green	160	1.25	All	0.076	0.091	0.099	0.110	0.145	0.101	3.043E+8
Green	160	1.75	Grassland	0.081	0.093	0.100	0.108	0.130	0.099	1.192E+8
Green	160	1.75	Cropland	0.077	0.096	0.110	0.124	0.153	0.110	2.537E+7
Green	160	1.75	PastureHay	0.076	0.087	0.097	0.108	0.140	0.097	1.698E+6
Green	160	1.75	Water	0.056	0.071	0.087	0.107	0.159	0.094	3.790E+5
Green	160	1.75	Developed	0.080	0.094	0.104	0.116	0.161	0.108	2.061E+5
Green	160	1.75	Barren	0.093	0.131	0.158	0.190	0.252	0.151	7.845E+4
Green	160	1.75	Wetlands	0.072	0.083	0.091	0.099	0.127	0.089	1.720E+4
Green	160	1.75	ShrubScrub	0.083	0.095	0.102	0.111	0.140	0.101	5.385E+4
Green	160	1.75	Forest	0.073	0.084	0.091	0.098	0.119	0.088	9.229E+3
Green	160	1.75	All	0.078	0.092	0.100	0.110	0.142	0.101	2.099E+8
Green	160	All	Grassland	0.082	0.097	0.106	0.117	0.142	0.106	1.093E+9
Green	160	All	Cropland	0.076	0.096	0.111	0.125	0.156	0.111	1.945E+8
Green	160	All	PastureHay	0.075	0.089	0.099	0.112	0.140	0.100	1.214E+7
Green	160	All	Water	0.058	0.079	0.098	0.117	0.189	0.101	2.850E+6
Green	160	All	Developed	0.082	0.100	0.110	0.123	0.164	0.113	1.590E+6
Green	160	All	Barren	0.100	0.137	0.160	0.184	0.260	0.162	1.117E+6
Green	160	All	Wetlands	0.068	0.084	0.092	0.102	0.127	0.094	1.499E+5
Green	160	All	ShrubScrub	0.084	0.100	0.110	0.122	0.154	0.110	7.549E+5
Green	160	All	Forest	0.073	0.086	0.094	0.103	0.127	0.094	1.379E+5
Green	160	All	All	0.079	0.096	0.106	0.118	0.147	0.107	1.874E+9
Green	170	-1.75	Grassland	0.102	0.120	0.128	0.137	0.155	0.123	1.355E+8
Green	170	-1.75	Cropland	0.088	0.111	0.122	0.133	0.160	0.122	2.285E+7
Green	170	-1.75	PastureHay	0.088	0.104	0.114	0.123	0.152	0.112	1.572E+6
Green	170	-1.75	Water	0.064	0.092	0.113	0.131	0.202	0.116	3.777E+5
Green	170	-1.75	Developed	0.098	0.116	0.125	0.135	0.167	0.126	2.085E+5
Green	170	-1.75	Barren	0.121	0.156	0.174	0.195	0.300	0.182	1.161E+5
Green	170	-1.75	Wetlands	0.079	0.094	0.102	0.112	0.143	0.103	2.236E+4
Green	170	-1.75	ShrubScrub	0.100	0.119	0.129	0.139	0.166	0.126	7.901E+4
Green	170	-1.75	Forest	0.079	0.097	0.108	0.119	0.142	0.102	1.469E+4
Green	170	-1.75	All	0.095	0.117	0.126	0.136	0.157	0.122	2.293E+8
Green	170	-1.25	Grassland	0.094	0.111	0.118	0.126	0.148	0.118	1.220E+8
Green	170	-1.25	Cropland	0.082	0.105	0.116	0.127	0.156	0.116	2.106E+7
Green	170	-1.25	PastureHay	0.082	0.099	0.109	0.118	0.139	0.107	1.237E+6
Green	170	-1.25	Water	0.064	0.095	0.111	0.126	0.211	0.113	2.494E+5
Green	170	-1.25	Developed	0.094	0.112	0.121	0.131	0.164	0.122	1.652E+5
Green	170	-1.25	Barren	0.118	0.158	0.167	0.195	0.283	0.176	1.454E+5
Green	170	-1.25	Wetlands	0.078	0.091	0.099	0.107	0.129	0.099	1.546E+4
Green	170	-1.25	ShrubScrub	0.095	0.111	0.120	0.130	0.166	0.121	9.726E+4
Green	170	-1.25	Forest	0.078	0.093	0.102	0.111	0.131	0.102	2.361E+4
Green	170	-1.25	All	0.089	0.109	0.118	0.126	0.151	0.117	2.077E+8
Green	170	-0.75	Grassland	0.088	0.106	0.114	0.123	0.144	0.111	1.300E+8
Green	170	-0.75	Cropland	0.076	0.098	0.110	0.124	0.153	0.113	2.317E+7
Green	170	-0.75	PastureHay	0.073	0.087	0.100	0.113	0.140	0.103	1.235E+6
Green	170	-0.75	Water	0.063	0.091	0.108	0.126	0.216	0.109	3.253E+5
Green	170	-0.75	Developed	0.083	0.105	0.114	0.126	0.165	0.117	1.752E+5
Green	170	-0.75	Barren	0.111	0.146	0.168	0.190	0.262	0.167	1.180E+5
Green	170	-0.75	Wetlands	0.073	0.086	0.095	0.103	0.127	0.095	1.621E+4
Green	170	-0.75	ShrubScrub	0.089	0.106	0.116	0.128	0.160	0.114	6.991E+4
Green	170	-0.75	Forest	0.075	0.089	0.099	0.108	0.128	0.097	1.646E+4
Green	170	-0.75	All	0.082	0.104	0.113	0.123	0.148	0.112	2.182E+8
Green	170	-0.25	Grassland	0.085	0.101	0.111	0.122	0.141	0.108	1.226E+8
Green	170	-0.25	Cropland	0.076	0.095	0.109	0.124	0.157	0.109	2.220E+7
Green	170	-0.25	PastureHay	0.074	0.085	0.094	0.107	0.142	0.098	1.343E+6
Green	170	-0.25	Water	0.058	0.088	0.108	0.130	0.169	0.101	3.025E+5
Green	170	-0.25	Developed	0.084	0.102	0.111	0.123	0.161	0.112	1.860E+5
Green	170	-0.25	Barren	0.103	0.136	0.155	0.177	0.240	0.162	1.514E+5
Green	170	-0.25	Wetlands	0.073	0.085	0.096	0.107	0.128	0.094	1.997E+4
Green	170	-0.25	ShrubScrub	0.086	0.102	0.115	0.125	0.151	0.110	1.098E+5
Green	170	-0.25	Forest	0.073	0.088	0.098	0.107	0.128	0.095	1.526E+4
Green	170	-0.25	All	0.079	0.099	0.109	0.122	0.146	0.108	2.146E+8
Green	170	0.25	Grassland	0.082	0.095	0.102	0.111	0.136	0.104	1.588E+8
Green	170	0.25	Cropland	0.074	0.091	0.105	0.122	0.155	0.106	2.268E+7
Green	170	0.25	PastureHay	0.074	0.084	0.091	0.105	0.160	0.097	1.156E+6
Green	170	0.25	Water	0.060	0.082	0.099	0.121	0.208	0.102	3.957E+5
Green	170	0.25	Developed	0.081	0.098	0.109	0.123	0.164	0.111	2.475E+5
Green	170	0.25	Barren	0.098	0.136	0.161	0.189	0.297	0.161	1.527E+5
Green	170	0.25	Wetlands	0.070	0.081	0.088	0.098	0.122	0.092	2.287E+4
Green	170	0.25	ShrubScrub	0.082	0.096	0.103	0.114	0.151	0.106	1.003E+5
Green	170	0.25	Forest	0.070	0.084	0.093	0.101	0.123	0.092	2.288E+4
Green	170	0.25	All	0.078	0.094	0.102	0.113	0.145	0.104	2.582E+8
Green	170	0.75	Grassland	0.081	0.093	0.099	0.107	0.131	0.101	1.769E+8
Green	170	0.75	Cropland	0.075	0.089	0.101	0.115	0.149	0.105	3.594E+7
Green	170	0.75	PastureHay	0.075	0.084	0.091	0.103	0.133	0.094	2.327E+6
Green	170	0.75	Water	0.057	0.079	0.092	0.114	0.177	0.097	4.463E+5
Green	170	0.75	Developed	0.082	0.098	0.107	0.118	0.168	0.110	2.680E+5
Green	170	0.75	Barren	0.093	0.127	0.150	0.177	0.269	0.153	1.625E+5
Green	170	0.75	Wetlands	0.068	0.079	0.085	0.093	0.118	0.089	2.415E+4
Green	170	0.75	ShrubScrub	0.082	0.095	0.103	0.113	0.145	0.103	1.138E+5
Green	170	0.75	Forest	0.071	0.082	0.091	0.099	0.120	0.091	1.960E+4
Green	170	0.75	All	0.078	0.092	0.099	0.108	0.139	0.101	3.111E+8
Green	170	1.25	Grassland	0.078	0.090	0.096	0.103	0.126	0.097	2.076E+8
Green	170	1.25	Cropland	0.074	0.089	0.103	0.120	0.152	0.104	2.733E+7
Green	170	1.25	PastureHay	0.076	0.085	0.093	0.106	0.141	0.095	1.459E+6
Green	170	1.25	Water	0.055	0.076	0.092	0.112	0.168	0.097	4.885E+5
Green	170	1.25	Developed	0.080	0.094	0.104	0.115	0.157	0.106	2.276E+5
Green	170	1.25	Barren	0.090	0.119	0.141	0.164	0.240	0.151	2.239E+5
Green	170	1.25	Wetlands	0.070	0.079	0.085	0.092	0.114	0.086	3.227E+4
Green	170	1.25	ShrubScrub	0.081	0.093	0.100	0.110	0.141	0.102	1.445E+5
Green	170	1.25	Forest	0.071	0.082	0.089	0.096	0.119	0.089	2.726E+4
Green	170	1.25	All	0.076	0.089	0.096	0.104	0.138	0.098	3.336E+8
Green	170	1.75	Grassland	0.080	0.090	0.096	0.103	0.125	0.096	1.568E+8
Green	170	1.75	Cropland	0.075	0.092	0.105	0.119	0.150	0.106	3.321E+7
Green	170	1.75	PastureHay	0.074	0.083	0.094	0.104	0.134	0.096	2.111E+6
Green	170	1.75	Water	0.055	0.069	0.083	0.104	0.165	0.093	4.805E+5
Green	170	1.75	Developed	0.079	0.094	0.104	0.115	0.160	0.106	2.515E+5
Green	170	1.75	Barren	0.092	0.123	0.145	0.174	0.284	0.145	1.260E+5
Green	170	1.75	Wetlands	0.069	0.080	0.087	0.095	0.123	0.087	2.264E+4
Green	170	1.75	ShrubScrub	0.081	0.090	0.095	0.104	0.134	0.098	8.347E+4
Green	170	1.75	Forest	0.071	0.084	0.090	0.097	0.116	0.087	1.423E+4
Green	170	1.75	All	0.078	0.090	0.097	0.105	0.137	0.098	2.772E+8
Green	170	All	Grassland	0.081	0.096	0.105	0.117	0.143	0.106	1.210E+9
Green	170	All	Cropland	0.076	0.094	0.108	0.123	0.154	0.109	2.084E+8
Green	170	All	PastureHay	0.074	0.086	0.098	0.111	0.142	0.100	1.244E+7
Green	170	All	Water	0.057	0.081	0.100	0.121	0.193	0.102	3.066E+6
Green	170	All	Developed	0.082	0.100	0.111	0.124	0.163	0.113	1.729E+6
Green	170	All	Barren	0.097	0.134	0.159	0.183	0.276	0.161	1.196E+6
Green	170	All	Wetlands	0.071	0.082	0.090	0.100	0.127	0.092	1.759E+5
Green	170	All	ShrubScrub	0.083	0.097	0.108	0.122	0.154	0.109	7.981E+5
Green	170	All	Forest	0.072	0.085	0.095	0.104	0.128	0.094	1.540E+5
Green	170	All	All	0.079	0.095	0.105	0.118	0.147	0.106	2.050E+9
Green	180	-1.75	Grassland	0.104	0.122	0.129	0.137	0.156	0.127	1.375E+8
Green	180	-1.75	Cropland	0.092	0.114	0.125	0.135	0.163	0.125	2.477E+7
Green	180	-1.75	PastureHay	0.089	0.105	0.116	0.125	0.150	0.116	1.695E+6
Green	180	-1.75	Water	0.064	0.092	0.114	0.132	0.197	0.117	3.654E+5
Green	180	-1.75	Developed	0.098	0.118	0.127	0.137	0.168	0.128	2.160E+5
Green	180	-1.75	Barren	0.121	0.156	0.174	0.194	0.295	0.183	1.176E+5
Green	180	-1.75	Wetlands	0.079	0.096	0.106	0.118	0.147	0.107	2.253E+4
Green	180	-1.75	ShrubScrub	0.100	0.117	0.127	0.137	0.165	0.127	9.676E+4
Green	180	-1.75	Forest	0.079	0.096	0.108	0.121	0.143	0.104	1.502E+4
Green	180	-1.75	All	0.097	0.119	0.128	0.137	0.158	0.126	2.372E+8
Green	180	-1.25	Grassland	0.094	0.111	0.119	0.128	0.152	0.118	1.448E+8
Green	180	-1.25	Cropland	0.081	0.105	0.117	0.129	0.160	0.118	2.464E+7
Green	180	-1.25	PastureHay	0.082	0.097	0.107	0.118	0.145	0.108	1.552E+6
Green	180	-1.25	Water	0.065	0.096	0.111	0.128	0.210	0.114	3.154E+5
Green	180	-1.25	Developed	0.094	0.112	0.122	0.132	0.164	0.123	1.933E+5
Green	180	-1.25	Barren	0.118	0.154	0.176	0.200	0.288	0.181	1.929E+5
Green	180	-1.25	Wetlands	0.078	0.092	0.099	0.108	0.132	0.100	1.665E+4
Green	180	-1.25	ShrubScrub	0.096	0.112	0.121	0.131	0.166	0.122	1.214E+5
Green	180	-1.25	Forest	0.078	0.095	0.104	0.113	0.136	0.104	2.746E+4
Green	180	-1.25	All	0.088	0.109	0.118	0.128	0.155	0.118	2.474E+8
[truncated: 8,080 more rows]
