# Supplementary material
Source: MDPI journal article supplement (https://www.mdpi.com/2072-4292/12/12/1919)
Supplement: s1 [file s1 › SupplementaryMaterial3.csv]

Blue	120	Grassland	-0.005	0.125	0.008	67	-0.005	0.125	0.008
Blue	120	Cropland	-0.003	0.126	0.010	12	-0.003	0.126	0.010
Blue	120	PastureHay	-0.002	0.119	0.010	10	-0.002	0.119	0.010
Blue	120	Water	-0.003	0.111	0.012	17	-0.003	0.109	0.011
Blue	120	Developed	-0.003	0.126	0.009	28	-0.003	0.123	0.008
Blue	120	Barren	-0.005	0.157	0.013	32	-0.005	0.155	0.011
Blue	120	Wetlands	-0.003	0.116	0.009	20	-0.003	0.116	0.009
Blue	120	ShrubScrub	-0.004	0.125	0.007	51	-0.004	0.124	0.007
Blue	120	Forest	-0.003	0.115	0.008	30	-0.003	0.114	0.008
Blue	120	All	-0.004	0.125	0.009	50	-0.004	0.124	0.008
Blue	130	Grassland	-0.004	0.124	0.009	57	-0.004	0.123	0.009
Blue	130	Cropland	-0.002	0.125	0.011	8	-0.002	0.124	0.010
Blue	130	PastureHay	-0.001	0.116	0.011	4	-0.001	0.116	0.011
Blue	130	Water	-0.004	0.111	0.013	24	-0.003	0.108	0.012
Blue	130	Developed	-0.002	0.124	0.009	21	-0.002	0.121	0.009
Blue	130	Barren	-0.005	0.158	0.014	35	-0.005	0.155	0.012
Blue	130	Wetlands	-0.003	0.113	0.010	13	-0.003	0.113	0.010
Blue	130	ShrubScrub	-0.003	0.123	0.008	33	-0.003	0.123	0.008
Blue	130	Forest	-0.002	0.112	0.009	18	-0.002	0.112	0.009
Blue	130	All	-0.004	0.124	0.010	41	-0.004	0.122	0.009
Blue	140	Grassland	-0.005	0.122	0.010	68	-0.005	0.120	0.009
Blue	140	Cropland	-0.003	0.123	0.012	12	-0.002	0.123	0.011
Blue	140	PastureHay	-0.002	0.114	0.012	13	-0.002	0.114	0.011
Blue	140	Water	-0.005	0.110	0.013	34	-0.004	0.107	0.012
Blue	140	Developed	-0.003	0.122	0.009	31	-0.003	0.119	0.009
Blue	140	Barren	-0.007	0.155	0.015	56	-0.007	0.153	0.014
Blue	140	Wetlands	-0.002	0.109	0.010	17	-0.002	0.109	0.010
Blue	140	ShrubScrub	-0.005	0.120	0.009	61	-0.005	0.119	0.009
Blue	140	Forest	-0.003	0.109	0.009	32	-0.003	0.108	0.009
Blue	140	All	-0.005	0.123	0.010	53	-0.005	0.119	0.010
Blue	150	Grassland	-0.007	0.118	0.010	85	-0.007	0.116	0.009
Blue	150	Cropland	-0.003	0.119	0.013	16	-0.003	0.119	0.013
Blue	150	PastureHay	-0.003	0.109	0.012	20	-0.003	0.109	0.012
Blue	150	Water	-0.004	0.109	0.012	33	-0.004	0.106	0.011
Blue	150	Developed	-0.004	0.119	0.009	50	-0.004	0.116	0.008
Blue	150	Barren	-0.008	0.153	0.015	67	-0.008	0.151	0.014
Blue	150	Wetlands	-0.004	0.106	0.010	26	-0.004	0.106	0.010
Blue	150	ShrubScrub	-0.006	0.117	0.009	77	-0.006	0.115	0.009
Blue	150	Forest	-0.004	0.105	0.009	38	-0.004	0.104	0.009
Blue	150	All	-0.006	0.120	0.010	68	-0.006	0.115	0.010
Blue	160	Grassland	-0.007	0.113	0.009	89	-0.007	0.111	0.009
Blue	160	Cropland	-0.002	0.113	0.014	13	-0.002	0.112	0.014
Blue	160	PastureHay	-0.002	0.103	0.011	18	-0.002	0.102	0.011
Blue	160	Water	-0.005	0.108	0.012	38	-0.005	0.103	0.011
Blue	160	Developed	-0.004	0.116	0.009	49	-0.004	0.112	0.008
Blue	160	Barren	-0.009	0.153	0.015	69	-0.010	0.151	0.013
Blue	160	Wetlands	-0.005	0.101	0.008	48	-0.004	0.101	0.008
Blue	160	ShrubScrub	-0.007	0.114	0.009	79	-0.007	0.112	0.009
Blue	160	Forest	-0.004	0.101	0.008	60	-0.004	0.100	0.008
Blue	160	All	-0.006	0.115	0.010	69	-0.007	0.111	0.010
Blue	170	Grassland	-0.008	0.110	0.009	98	-0.009	0.110	0.008
Blue	170	Cropland	-0.003	0.109	0.014	28	-0.004	0.108	0.014
Blue	170	PastureHay	-0.004	0.100	0.010	47	-0.004	0.100	0.010
Blue	170	Water	-0.006	0.105	0.012	57	-0.005	0.101	0.010
Blue	170	Developed	-0.005	0.114	0.009	67	-0.005	0.111	0.008
Blue	170	Barren	-0.010	0.151	0.014	82	-0.011	0.149	0.013
Blue	170	Wetlands	-0.005	0.099	0.008	79	-0.005	0.099	0.007
Blue	170	ShrubScrub	-0.008	0.112	0.009	95	-0.007	0.110	0.008
Blue	170	Forest	-0.005	0.099	0.008	82	-0.005	0.099	0.007
Blue	170	All	-0.007	0.112	0.010	82	-0.008	0.109	0.009
Blue	180	Grassland	-0.008	0.110	0.009	98	-0.008	0.110	0.009
Blue	180	Cropland	-0.004	0.108	0.013	34	-0.004	0.106	0.013
Blue	180	PastureHay	-0.004	0.100	0.010	55	-0.004	0.100	0.010
Blue	180	Water	-0.006	0.104	0.012	66	-0.005	0.100	0.011
Blue	180	Developed	-0.005	0.115	0.009	69	-0.005	0.112	0.009
Blue	180	Barren	-0.010	0.152	0.015	82	-0.010	0.150	0.013
Blue	180	Wetlands	-0.005	0.099	0.008	88	-0.005	0.099	0.008
Blue	180	ShrubScrub	-0.008	0.112	0.009	96	-0.007	0.110	0.008
Blue	180	Forest	-0.005	0.099	0.008	88	-0.005	0.100	0.007
Blue	180	All	-0.007	0.112	0.010	84	-0.008	0.109	0.009
Blue	190	Grassland	-0.008	0.112	0.009	99	-0.008	0.111	0.009
Blue	190	Cropland	-0.004	0.108	0.013	48	-0.005	0.106	0.013
Blue	190	PastureHay	-0.005	0.102	0.010	71	-0.005	0.101	0.010
Blue	190	Water	-0.006	0.104	0.011	70	-0.005	0.099	0.010
Blue	190	Developed	-0.005	0.116	0.009	77	-0.005	0.113	0.009
Blue	190	Barren	-0.009	0.152	0.015	84	-0.009	0.150	0.013
Blue	190	Wetlands	-0.005	0.099	0.008	81	-0.004	0.099	0.008
Blue	190	ShrubScrub	-0.007	0.113	0.009	97	-0.007	0.111	0.009
Blue	190	Forest	-0.005	0.101	0.008	94	-0.005	0.101	0.008
Blue	190	All	-0.007	0.113	0.010	88	-0.008	0.110	0.009
Blue	200	Grassland	-0.009	0.115	0.009	99	-0.009	0.114	0.009
Blue	200	Cropland	-0.006	0.111	0.013	67	-0.006	0.109	0.013
Blue	200	PastureHay	-0.006	0.104	0.011	84	-0.006	0.104	0.010
Blue	200	Water	-0.006	0.105	0.013	59	-0.006	0.100	0.012
Blue	200	Developed	-0.006	0.118	0.009	85	-0.006	0.115	0.009
Blue	200	Barren	-0.008	0.153	0.015	83	-0.009	0.151	0.014
Blue	200	Wetlands	-0.005	0.101	0.008	91	-0.005	0.099	0.008
Blue	200	ShrubScrub	-0.008	0.115	0.009	97	-0.008	0.113	0.009
Blue	200	Forest	-0.006	0.103	0.008	99	-0.006	0.103	0.008
Blue	200	All	-0.008	0.116	0.010	93	-0.008	0.113	0.009
Blue	210	Grassland	-0.008	0.116	0.009	98	-0.008	0.114	0.008
Blue	210	Cropland	-0.006	0.113	0.014	60	-0.006	0.111	0.014
Blue	210	PastureHay	-0.006	0.105	0.011	71	-0.006	0.105	0.011
Blue	210	Water	-0.006	0.105	0.013	54	-0.005	0.101	0.012
Blue	210	Developed	-0.005	0.118	0.009	82	-0.005	0.116	0.009
Blue	210	Barren	-0.008	0.154	0.015	79	-0.008	0.151	0.013
Blue	210	Wetlands	-0.005	0.101	0.008	92	-0.005	0.099	0.008
Blue	210	ShrubScrub	-0.007	0.115	0.009	93	-0.007	0.113	0.008
Blue	210	Forest	-0.006	0.103	0.008	99	-0.006	0.104	0.008
Blue	210	All	-0.008	0.117	0.010	90	-0.008	0.113	0.009
Blue	220	Grassland	-0.008	0.118	0.009	98	-0.007	0.116	0.008
Blue	220	Cropland	-0.006	0.117	0.013	69	-0.006	0.116	0.013
Blue	220	PastureHay	-0.006	0.108	0.011	74	-0.006	0.107	0.011
Blue	220	Water	-0.005	0.106	0.012	55	-0.005	0.102	0.012
Blue	220	Developed	-0.005	0.119	0.009	83	-0.005	0.117	0.008
Blue	220	Barren	-0.007	0.155	0.014	79	-0.007	0.153	0.013
Blue	220	Wetlands	-0.005	0.101	0.008	93	-0.004	0.100	0.007
Blue	220	ShrubScrub	-0.007	0.116	0.009	93	-0.007	0.115	0.008
Blue	220	Forest	-0.005	0.104	0.009	98	-0.005	0.104	0.008
Blue	220	All	-0.007	0.119	0.010	92	-0.007	0.115	0.009
Blue	230	Grassland	-0.007	0.119	0.009	98	-0.007	0.116	0.009
Blue	230	Cropland	-0.005	0.119	0.013	54	-0.005	0.119	0.013
Blue	230	PastureHay	-0.005	0.110	0.011	64	-0.005	0.109	0.011
Blue	230	Water	-0.005	0.107	0.013	56	-0.005	0.103	0.012
Blue	230	Developed	-0.005	0.120	0.009	79	-0.005	0.118	0.009
Blue	230	Barren	-0.007	0.156	0.014	79	-0.007	0.154	0.012
Blue	230	Wetlands	-0.005	0.102	0.008	91	-0.005	0.100	0.007
Blue	230	ShrubScrub	-0.006	0.117	0.009	88	-0.006	0.115	0.009
Blue	230	Forest	-0.005	0.104	0.009	95	-0.005	0.104	0.008
Blue	230	All	-0.006	0.120	0.010	88	-0.006	0.116	0.009
Blue	240	Grassland	-0.006	0.118	0.009	97	-0.006	0.116	0.008
Blue	240	Cropland	-0.005	0.120	0.012	45	-0.004	0.120	0.012
Blue	240	PastureHay	-0.004	0.109	0.011	51	-0.004	0.108	0.010
Blue	240	Water	-0.004	0.106	0.012	53	-0.004	0.102	0.010
Blue	240	Developed	-0.004	0.119	0.009	70	-0.004	0.117	0.008
Blue	240	Barren	-0.007	0.156	0.013	79	-0.007	0.154	0.012
Blue	240	Wetlands	-0.004	0.101	0.008	87	-0.005	0.100	0.007
Blue	240	ShrubScrub	-0.005	0.116	0.008	85	-0.005	0.115	0.008
Blue	240	Forest	-0.004	0.103	0.009	91	-0.004	0.103	0.008
Blue	240	All	-0.006	0.120	0.009	84	-0.006	0.116	0.009
Blue	250	Grassland	-0.006	0.118	0.009	97	-0.006	0.116	0.008
Blue	250	Cropland	-0.005	0.120	0.012	57	-0.005	0.120	0.012
Blue	250	PastureHay	-0.005	0.108	0.010	68	-0.005	0.108	0.010
Blue	250	Water	-0.005	0.106	0.012	62	-0.004	0.102	0.010
Blue	250	Developed	-0.004	0.119	0.009	74	-0.004	0.117	0.008
Blue	250	Barren	-0.007	0.156	0.013	79	-0.007	0.154	0.011
Blue	250	Wetlands	-0.004	0.101	0.008	82	-0.004	0.100	0.007
Blue	250	ShrubScrub	-0.005	0.116	0.009	86	-0.005	0.114	0.008
Blue	250	Forest	-0.004	0.103	0.009	83	-0.004	0.103	0.008
Blue	250	All	-0.006	0.120	0.009	88	-0.006	0.116	0.009
Blue	260	Grassland	-0.005	0.119	0.009	93	-0.005	0.117	0.008
Blue	260	Cropland	-0.004	0.121	0.011	45	-0.004	0.121	0.011
Blue	260	PastureHay	-0.004	0.109	0.010	53	-0.004	0.109	0.010
Blue	260	Water	-0.004	0.106	0.012	48	-0.004	0.103	0.010
Blue	260	Developed	-0.004	0.119	0.009	65	-0.004	0.117	0.008
Blue	260	Barren	-0.006	0.156	0.013	71	-0.006	0.154	0.012
Blue	260	Wetlands	-0.003	0.102	0.007	56	-0.003	0.100	0.007
Blue	260	ShrubScrub	-0.004	0.116	0.009	70	-0.004	0.115	0.008
Blue	260	Forest	-0.003	0.103	0.008	68	-0.003	0.103	0.008
Blue	260	All	-0.005	0.121	0.009	80	-0.005	0.117	0.009
Blue	270	Grassland	-0.005	0.119	0.009	85	-0.005	0.117	0.008
Blue	270	Cropland	-0.004	0.121	0.011	27	-0.003	0.121	0.011
Blue	270	PastureHay	-0.003	0.109	0.009	28	-0.003	0.109	0.009
Blue	270	Water	-0.004	0.107	0.012	39	-0.003	0.103	0.010
Blue	270	Developed	-0.003	0.120	0.009	48	-0.003	0.118	0.008
Blue	270	Barren	-0.006	0.156	0.014	69	-0.006	0.154	0.012
Blue	270	Wetlands	-0.003	0.103	0.008	37	-0.003	0.102	0.008
Blue	270	ShrubScrub	-0.004	0.116	0.008	62	-0.004	0.115	0.008
Blue	270	Forest	-0.002	0.104	0.009	33	-0.002	0.103	0.008
Blue	270	All	-0.004	0.121	0.009	69	-0.004	0.117	0.009
Green	120	Grassland	-0.005	0.123	0.009	67	-0.005	0.122	0.008
Green	120	Cropland	-0.003	0.124	0.013	11	-0.003	0.123	0.013
Green	120	PastureHay	-0.003	0.116	0.013	9	-0.002	0.115	0.012
Green	120	Water	-0.003	0.105	0.017	15	-0.003	0.103	0.017
Green	120	Developed	-0.003	0.124	0.010	27	-0.003	0.121	0.009
Green	120	Barren	-0.005	0.165	0.018	40	-0.006	0.163	0.016
Green	120	Wetlands	-0.002	0.110	0.011	19	-0.002	0.109	0.010
Green	120	ShrubScrub	-0.004	0.123	0.009	55	-0.004	0.122	0.008
Green	120	Forest	-0.003	0.109	0.009	31	-0.003	0.108	0.009
Green	120	All	-0.004	0.124	0.010	50	-0.004	0.121	0.009
Green	130	Grassland	-0.004	0.121	0.010	59	-0.004	0.119	0.010
Green	130	Cropland	-0.002	0.123	0.014	7	-0.002	0.122	0.013
Green	130	PastureHay	-0.001	0.113	0.014	4	-0.001	0.113	0.013
Green	130	Water	-0.004	0.105	0.017	24	-0.004	0.102	0.016
Green	130	Developed	-0.002	0.122	0.011	23	-0.002	0.119	0.010
Green	130	Barren	-0.005	0.164	0.019	38	-0.006	0.162	0.017
Green	130	Wetlands	-0.002	0.108	0.012	15	-0.002	0.107	0.012
Green	130	ShrubScrub	-0.004	0.121	0.010	39	-0.003	0.119	0.009
Green	130	Forest	-0.002	0.107	0.010	24	-0.003	0.106	0.010
Green	130	All	-0.004	0.122	0.011	43	-0.004	0.119	0.010
Green	140	Grassland	-0.005	0.118	0.011	70	-0.005	0.116	0.010
Green	140	Cropland	-0.002	0.122	0.015	9	-0.002	0.121	0.014
Green	140	PastureHay	-0.002	0.110	0.014	12	-0.002	0.110	0.014
Green	140	Water	-0.005	0.104	0.018	30	-0.005	0.101	0.017
Green	140	Developed	-0.003	0.120	0.011	29	-0.003	0.117	0.010
Green	140	Barren	-0.007	0.162	0.020	51	-0.008	0.160	0.018
Green	140	Wetlands	-0.002	0.104	0.013	13	-0.002	0.103	0.012
Green	140	ShrubScrub	-0.006	0.118	0.011	70	-0.005	0.116	0.010
Green	140	Forest	-0.003	0.103	0.011	34	-0.003	0.103	0.010
Green	140	All	-0.004	0.120	0.012	54	-0.005	0.116	0.011
Green	150	Grassland	-0.007	0.114	0.011	85	-0.007	0.112	0.010
Green	150	Cropland	-0.003	0.118	0.016	14	-0.003	0.117	0.016
Green	150	PastureHay	-0.003	0.106	0.015	17	-0.003	0.106	0.014
Green	150	Water	-0.005	0.103	0.017	30	-0.005	0.099	0.016
Green	150	Developed	-0.004	0.117	0.012	43	-0.004	0.114	0.010
Green	150	Barren	-0.008	0.160	0.021	57	-0.009	0.158	0.019
Green	150	Wetlands	-0.003	0.101	0.013	18	-0.002	0.099	0.012
Green	150	ShrubScrub	-0.006	0.115	0.011	75	-0.006	0.113	0.010
Green	150	Forest	-0.004	0.100	0.011	42	-0.004	0.100	0.011
Green	150	All	-0.006	0.117	0.012	67	-0.006	0.112	0.011
Green	160	Grassland	-0.007	0.108	0.010	90	-0.007	0.108	0.010
Green	160	Cropland	-0.002	0.112	0.017	11	-0.002	0.111	0.017
Green	160	PastureHay	-0.001	0.100	0.014	13	-0.001	0.100	0.014
Green	160	Water	-0.006	0.101	0.017	41	-0.006	0.096	0.015
Green	160	Developed	-0.004	0.114	0.011	42	-0.004	0.110	0.010
Green	160	Barren	-0.009	0.160	0.021	61	-0.010	0.159	0.018
Green	160	Wetlands	-0.003	0.095	0.011	27	-0.003	0.094	0.010
Green	160	ShrubScrub	-0.007	0.112	0.010	76	-0.006	0.110	0.010
Green	160	Forest	-0.004	0.096	0.010	50	-0.004	0.095	0.010
Green	160	All	-0.006	0.111	0.012	68	-0.006	0.108	0.010
Green	170	Grassland	-0.009	0.107	0.010	98	-0.009	0.107	0.009
Green	170	Cropland	-0.003	0.108	0.018	26	-0.004	0.107	0.018
Green	170	PastureHay	-0.004	0.098	0.014	37	-0.004	0.097	0.013
Green	170	Water	-0.007	0.099	0.016	65	-0.006	0.094	0.014
Green	170	Developed	-0.005	0.113	0.011	65	-0.005	0.109	0.010
Green	170	Barren	-0.011	0.159	0.020	77	-0.011	0.158	0.018
Green	170	Wetlands	-0.004	0.092	0.010	55	-0.004	0.091	0.010
Green	170	ShrubScrub	-0.008	0.111	0.010	95	-0.008	0.108	0.009
Green	170	Forest	-0.005	0.094	0.010	77	-0.005	0.094	0.009
Green	170	All	-0.008	0.109	0.011	81	-0.008	0.106	0.010
Green	180	Grassland	-0.009	0.107	0.010	98	-0.009	0.107	0.009
Green	180	Cropland	-0.004	0.107	0.017	34	-0.004	0.106	0.017
Green	180	PastureHay	-0.004	0.098	0.014	45	-0.004	0.097	0.013
Green	180	Water	-0.007	0.098	0.016	72	-0.007	0.093	0.014
Green	180	Developed	-0.005	0.114	0.011	70	-0.005	0.110	0.010
Green	180	Barren	-0.010	0.160	0.020	78	-0.011	0.158	0.018
Green	180	Wetlands	-0.005	0.092	0.010	73	-0.005	0.091	0.010
Green	180	ShrubScrub	-0.008	0.111	0.010	97	-0.008	0.109	0.010
Green	180	Forest	-0.006	0.094	0.010	83	-0.006	0.094	0.009
Green	180	All	-0.008	0.109	0.012	84	-0.008	0.106	0.010
Green	190	Grassland	-0.009	0.108	0.010	98	-0.009	0.108	0.009
Green	190	Cropland	-0.005	0.107	0.017	41	-0.005	0.105	0.017
Green	190	PastureHay	-0.005	0.098	0.013	61	-0.005	0.097	0.013
Green	190	Water	-0.007	0.098	0.015	76	-0.006	0.092	0.014
Green	190	Developed	-0.005	0.115	0.011	71	-0.005	0.111	0.010
Green	190	Barren	-0.009	0.161	0.020	76	-0.010	0.159	0.018
Green	190	Wetlands	-0.005	0.092	0.010	80	-0.005	0.091	0.009
Green	190	ShrubScrub	-0.008	0.112	0.011	97	-0.008	0.109	0.010
Green	190	Forest	-0.006	0.094	0.010	87	-0.006	0.095	0.009
Green	190	All	-0.008	0.110	0.012	86	-0.008	0.107	0.010
Green	200	Grassland	-0.009	0.111	0.010	99	-0.009	0.110	0.010
Green	200	Cropland	-0.007	0.110	0.018	61	-0.007	0.108	0.018
Green	200	PastureHay	-0.006	0.101	0.014	77	-0.006	0.100	0.013
Green	200	Water	-0.007	0.098	0.016	68	-0.006	0.093	0.014
Green	200	Developed	-0.005	0.116	0.011	76	-0.005	0.114	0.010
Green	200	Barren	-0.008	0.162	0.021	69	-0.009	0.160	0.019
Green	200	Wetlands	-0.006	0.093	0.010	90	-0.005	0.092	0.010
Green	200	ShrubScrub	-0.008	0.113	0.011	95	-0.008	0.111	0.011
Green	200	Forest	-0.006	0.096	0.010	97	-0.006	0.096	0.009
Green	200	All	-0.008	0.112	0.012	91	-0.008	0.109	0.011
Green	210	Grassland	-0.008	0.111	0.010	98	-0.008	0.110	0.010
Green	210	Cropland	-0.007	0.113	0.019	50	-0.006	0.111	0.018
Green	210	PastureHay	-0.006	0.102	0.015	57	-0.006	0.101	0.014
Green	210	Water	-0.006	0.098	0.016	65	-0.006	0.093	0.014
Green	210	Developed	-0.005	0.116	0.011	71	-0.005	0.114	0.010
Green	210	Barren	-0.008	0.162	0.020	66	-0.009	0.160	0.019
Green	210	Wetlands	-0.005	0.092	0.010	83	-0.005	0.091	0.009
Green	210	ShrubScrub	-0.007	0.113	0.011	90	-0.007	0.110	0.010
Green	210	Forest	-0.006	0.095	0.010	96	-0.006	0.096	0.009
Green	210	All	-0.008	0.113	0.012	87	-0.008	0.110	0.011
Green	220	Grassland	-0.008	0.112	0.010	98	-0.007	0.111	0.010
Green	220	Cropland	-0.006	0.117	0.018	53	-0.006	0.116	0.018
Green	220	PastureHay	-0.006	0.105	0.015	58	-0.005	0.104	0.014
Green	220	Water	-0.006	0.098	0.016	65	-0.006	0.094	0.014
Green	220	Developed	-0.005	0.117	0.011	71	-0.005	0.115	0.010
Green	220	Barren	-0.007	0.163	0.020	66	-0.007	0.161	0.018
Green	220	Wetlands	-0.004	0.091	0.009	80	-0.004	0.090	0.009
Green	220	ShrubScrub	-0.007	0.113	0.011	88	-0.006	0.111	0.010
Green	220	Forest	-0.005	0.095	0.010	94	-0.005	0.096	0.009
Green	220	All	-0.007	0.115	0.012	87	-0.007	0.111	0.011
Green	230	Grassland	-0.007	0.112	0.011	97	-0.007	0.111	0.010
Green	230	Cropland	-0.005	0.119	0.018	38	-0.005	0.120	0.018
Green	230	PastureHay	-0.005	0.106	0.015	50	-0.005	0.105	0.014
Green	230	Water	-0.006	0.098	0.015	65	-0.005	0.094	0.013
Green	230	Developed	-0.004	0.116	0.011	68	-0.004	0.114	0.010
Green	230	Barren	-0.007	0.163	0.019	68	-0.008	0.161	0.018
Green	230	Wetlands	-0.005	0.091	0.010	82	-0.005	0.090	0.009
Green	230	ShrubScrub	-0.006	0.113	0.011	82	-0.006	0.111	0.011
Green	230	Forest	-0.005	0.094	0.010	93	-0.005	0.095	0.009
Green	230	All	-0.006	0.115	0.012	82	-0.007	0.112	0.011
Green	240	Grassland	-0.006	0.111	0.011	94	-0.006	0.111	0.010
Green	240	Cropland	-0.005	0.120	0.018	31	-0.005	0.120	0.017
Green	240	PastureHay	-0.003	0.105	0.015	28	-0.003	0.104	0.015
Green	240	Water	-0.005	0.098	0.015	49	-0.004	0.093	0.013
Green	240	Developed	-0.004	0.115	0.011	55	-0.004	0.113	0.010
Green	240	Barren	-0.007	0.163	0.019	71	-0.008	0.161	0.017
Green	240	Wetlands	-0.004	0.091	0.010	73	-0.004	0.089	0.009
Green	240	ShrubScrub	-0.006	0.112	0.011	76	-0.005	0.110	0.010
Green	240	Forest	-0.004	0.093	0.010	85	-0.004	0.094	0.009
Green	240	All	-0.006	0.115	0.012	77	-0.006	0.111	0.011
Green	250	Grassland	-0.007	0.111	0.011	95	-0.006	0.110	0.011
Green	250	Cropland	-0.005	0.119	0.017	39	-0.005	0.119	0.017
Green	250	PastureHay	-0.004	0.104	0.015	37	-0.004	0.103	0.015
Green	250	Water	-0.005	0.098	0.016	55	-0.005	0.093	0.014
Green	250	Developed	-0.004	0.115	0.012	62	-0.004	0.112	0.011
Green	250	Barren	-0.008	0.163	0.019	73	-0.008	0.161	0.017
Green	250	Wetlands	-0.004	0.091	0.010	69	-0.004	0.090	0.009
Green	250	ShrubScrub	-0.006	0.111	0.012	80	-0.006	0.109	0.011
Green	250	Forest	-0.004	0.093	0.010	83	-0.004	0.093	0.010
Green	250	All	-0.006	0.114	0.012	80	-0.006	0.111	0.011
Green	260	Grassland	-0.006	0.111	0.011	90	-0.006	0.111	0.011
Green	260	Cropland	-0.004	0.119	0.016	28	-0.004	0.119	0.016
Green	260	PastureHay	-0.003	0.104	0.015	25	-0.003	0.103	0.015
Green	260	Water	-0.005	0.098	0.016	48	-0.005	0.094	0.014
Green	260	Developed	-0.004	0.114	0.012	52	-0.004	0.112	0.011
Green	260	Barren	-0.007	0.163	0.019	69	-0.008	0.160	0.017
Green	260	Wetlands	-0.004	0.093	0.011	54	-0.004	0.091	0.010
Green	260	ShrubScrub	-0.005	0.111	0.012	72	-0.005	0.109	0.011
Green	260	Forest	-0.004	0.094	0.011	70	-0.004	0.094	0.010
Green	260	All	-0.005	0.115	0.012	73	-0.005	0.111	0.012
Green	270	Grassland	-0.005	0.112	0.011	73	-0.005	0.111	0.011
Green	270	Cropland	-0.003	0.119	0.016	16	-0.003	0.119	0.016
Green	270	PastureHay	-0.002	0.104	0.015	7	-0.002	0.103	0.015
Green	270	Water	-0.004	0.099	0.016	35	-0.004	0.095	0.014
Green	270	Developed	-0.003	0.115	0.012	35	-0.003	0.113	0.011
Green	270	Barren	-0.007	0.162	0.019	66	-0.008	0.160	0.017
Green	270	Wetlands	-0.004	0.095	0.012	48	-0.004	0.094	0.011
Green	270	ShrubScrub	-0.004	0.110	0.012	51	-0.004	0.108	0.011
Green	270	Forest	-0.003	0.094	0.011	33	-0.003	0.094	0.011
Green	270	All	-0.004	0.115	0.013	56	-0.004	0.111	0.012
Red	120	Grassland	-0.006	0.125	0.014	63	-0.006	0.124	0.013
Red	120	Cropland	-0.004	0.133	0.021	9	-0.004	0.132	0.020
Red	120	PastureHay	-0.003	0.119	0.021	6	-0.003	0.119	0.020
Red	120	Water	-0.003	0.098	0.022	14	-0.002	0.097	0.020
Red	120	Developed	-0.004	0.126	0.015	24	-0.004	0.123	0.014
Red	120	Barren	-0.007	0.175	0.022	38	-0.008	0.173	0.020
Red	120	Wetlands	-0.004	0.109	0.017	18	-0.004	0.108	0.016
Red	120	ShrubScrub	-0.005	0.125	0.013	42	-0.005	0.124	0.012
Red	120	Forest	-0.004	0.107	0.014	28	-0.004	0.106	0.014
Red	120	All	-0.006	0.125	0.016	46	-0.006	0.124	0.014
Red	130	Grassland	-0.006	0.122	0.015	56	-0.006	0.120	0.015
Red	130	Cropland	-0.002	0.130	0.022	6	-0.002	0.130	0.021
Red	130	PastureHay	-0.001	0.114	0.023	3	-0.001	0.114	0.023
Red	130	Water	-0.004	0.098	0.022	18	-0.004	0.095	0.021
Red	130	Developed	-0.003	0.123	0.016	23	-0.003	0.120	0.015
Red	130	Barren	-0.007	0.174	0.023	39	-0.008	0.172	0.021
Red	130	Wetlands	-0.004	0.104	0.019	12	-0.004	0.103	0.018
Red	130	ShrubScrub	-0.004	0.122	0.014	32	-0.004	0.120	0.014
Red	130	Forest	-0.004	0.102	0.016	22	-0.004	0.101	0.016
Red	130	All	-0.005	0.123	0.017	40	-0.005	0.120	0.016
Red	140	Grassland	-0.008	0.116	0.016	70	-0.008	0.114	0.016
Red	140	Cropland	-0.003	0.127	0.024	9	-0.003	0.126	0.023
Red	140	PastureHay	-0.004	0.108	0.023	13	-0.004	0.108	0.023
Red	140	Water	-0.005	0.096	0.022	24	-0.005	0.092	0.021
Red	140	Developed	-0.005	0.119	0.017	32	-0.005	0.115	0.015
Red	140	Barren	-0.009	0.170	0.025	55	-0.010	0.169	0.023
Red	140	Wetlands	-0.003	0.096	0.019	12	-0.002	0.095	0.019
Red	140	ShrubScrub	-0.008	0.116	0.016	67	-0.008	0.114	0.015
Red	140	Forest	-0.003	0.095	0.017	31	-0.004	0.094	0.016
Red	140	All	-0.007	0.119	0.018	53	-0.007	0.115	0.017
Red	150	Grassland	-0.011	0.109	0.016	90	-0.011	0.108	0.015
Red	150	Cropland	-0.005	0.120	0.027	15	-0.005	0.120	0.027
Red	150	PastureHay	-0.004	0.101	0.024	21	-0.005	0.101	0.024
Red	150	Water	-0.006	0.094	0.022	29	-0.006	0.089	0.020
Red	150	Developed	-0.007	0.114	0.017	52	-0.007	0.110	0.015
Red	150	Barren	-0.012	0.168	0.026	65	-0.012	0.166	0.023
Red	150	Wetlands	-0.005	0.090	0.020	21	-0.004	0.089	0.019
Red	150	ShrubScrub	-0.010	0.111	0.016	83	-0.010	0.108	0.015
Red	150	Forest	-0.006	0.089	0.017	47	-0.006	0.088	0.016
Red	150	All	-0.009	0.112	0.019	70	-0.010	0.109	0.017
Red	160	Grassland	-0.012	0.101	0.015	92	-0.012	0.101	0.014
Red	160	Cropland	-0.002	0.109	0.029	11	-0.003	0.108	0.029
Red	160	PastureHay	-0.002	0.090	0.024	15	-0.002	0.090	0.023
Red	160	Water	-0.006	0.090	0.021	34	-0.006	0.084	0.019
Red	160	Developed	-0.007	0.109	0.017	49	-0.007	0.104	0.015
Red	160	Barren	-0.013	0.167	0.026	66	-0.014	0.166	0.024
Red	160	Wetlands	-0.006	0.080	0.016	34	-0.005	0.079	0.015
Red	160	ShrubScrub	-0.010	0.106	0.015	81	-0.010	0.103	0.014
Red	160	Forest	-0.007	0.081	0.015	58	-0.007	0.081	0.014
Red	160	All	-0.010	0.103	0.019	70	-0.011	0.101	0.016
Red	170	Grassland	-0.014	0.099	0.014	98	-0.014	0.099	0.013
Red	170	Cropland	-0.005	0.102	0.029	25	-0.006	0.102	0.029
Red	170	PastureHay	-0.007	0.087	0.023	40	-0.007	0.086	0.022
Red	170	Water	-0.008	0.087	0.020	54	-0.008	0.080	0.018
Red	170	Developed	-0.008	0.108	0.016	70	-0.008	0.104	0.015
Red	170	Barren	-0.015	0.167	0.025	80	-0.016	0.165	0.023
Red	170	Wetlands	-0.008	0.075	0.014	69	-0.007	0.073	0.014
Red	170	ShrubScrub	-0.013	0.104	0.014	97	-0.012	0.100	0.013
Red	170	Forest	-0.009	0.078	0.014	86	-0.009	0.079	0.013
Red	170	All	-0.012	0.100	0.018	82	-0.013	0.099	0.015
Red	180	Grassland	-0.014	0.100	0.015	98	-0.014	0.101	0.014
Red	180	Cropland	-0.007	0.102	0.028	33	-0.007	0.100	0.029
Red	180	PastureHay	-0.008	0.087	0.022	51	-0.007	0.086	0.022
Red	180	Water	-0.008	0.086	0.020	62	-0.008	0.079	0.017
Red	180	Developed	-0.008	0.109	0.017	74	-0.009	0.105	0.015
Red	180	Barren	-0.015	0.169	0.026	82	-0.015	0.167	0.024
Red	180	Wetlands	-0.008	0.075	0.014	75	-0.008	0.073	0.014
Red	180	ShrubScrub	-0.013	0.105	0.014	98	-0.012	0.102	0.014
Red	180	Forest	-0.009	0.079	0.014	92	-0.009	0.080	0.013
Red	180	All	-0.012	0.102	0.018	84	-0.013	0.100	0.015
Red	190	Grassland	-0.013	0.103	0.015	98	-0.013	0.103	0.014
Red	190	Cropland	-0.008	0.104	0.028	42	-0.008	0.101	0.028
Red	190	PastureHay	-0.010	0.089	0.022	70	-0.010	0.088	0.021
Red	190	Water	-0.008	0.085	0.019	68	-0.008	0.078	0.016
Red	190	Developed	-0.008	0.112	0.017	76	-0.008	0.108	0.016
Red	190	Barren	-0.013	0.170	0.026	79	-0.013	0.168	0.024
Red	190	Wetlands	-0.008	0.075	0.013	86	-0.008	0.072	0.013
Red	190	ShrubScrub	-0.012	0.106	0.015	98	-0.012	0.103	0.014
Red	190	Forest	-0.009	0.080	0.013	95	-0.009	0.081	0.013
Red	190	All	-0.012	0.104	0.019	87	-0.012	0.102	0.016
Red	200	Grassland	-0.014	0.108	0.016	99	-0.014	0.108	0.015
Red	200	Cropland	-0.011	0.110	0.030	62	-0.011	0.106	0.030
Red	200	PastureHay	-0.012	0.094	0.022	86	-0.012	0.093	0.022
Red	200	Water	-0.008	0.086	0.020	64	-0.008	0.080	0.017
Red	200	Developed	-0.009	0.115	0.017	81	-0.009	0.112	0.016
Red	200	Barren	-0.012	0.172	0.026	75	-0.012	0.170	0.025
Red	200	Wetlands	-0.008	0.077	0.014	86	-0.008	0.075	0.014
Red	200	ShrubScrub	-0.012	0.109	0.016	97	-0.012	0.106	0.015
Red	200	Forest	-0.010	0.082	0.014	99	-0.010	0.084	0.013
Red	200	All	-0.013	0.109	0.019	91	-0.013	0.107	0.017
Red	210	Grassland	-0.013	0.109	0.016	98	-0.013	0.109	0.015
Red	210	Cropland	-0.011	0.116	0.032	49	-0.011	0.113	0.031
Red	210	PastureHay	-0.011	0.097	0.025	65	-0.010	0.097	0.024
Red	210	Water	-0.008	0.085	0.020	66	-0.008	0.080	0.017
Red	210	Developed	-0.009	0.116	0.017	79	-0.009	0.113	0.016
Red	210	Barren	-0.011	0.173	0.026	71	-0.012	0.170	0.024
Red	210	Wetlands	-0.008	0.077	0.014	79	-0.008	0.074	0.013
Red	210	ShrubScrub	-0.011	0.109	0.016	93	-0.011	0.106	0.015
Red	210	Forest	-0.009	0.082	0.013	98	-0.009	0.084	0.013
Red	210	All	-0.012	0.112	0.020	87	-0.012	0.109	0.017
Red	220	Grassland	-0.011	0.112	0.016	97	-0.011	0.111	0.015
Red	220	Cropland	-0.010	0.123	0.032	48	-0.010	0.123	0.032
Red	220	PastureHay	-0.010	0.102	0.024	65	-0.010	0.101	0.023
Red	220	Water	-0.007	0.086	0.019	63	-0.007	0.081	0.017
Red	220	Developed	-0.008	0.117	0.017	76	-0.008	0.115	0.016
Red	220	Barren	-0.009	0.174	0.025	69	-0.010	0.172	0.023
Red	220	Wetlands	-0.006	0.076	0.014	78	-0.006	0.074	0.013
Red	220	ShrubScrub	-0.010	0.110	0.016	93	-0.010	0.108	0.015
Red	220	Forest	-0.008	0.083	0.013	97	-0.008	0.084	0.013
Red	220	All	-0.011	0.115	0.020	86	-0.011	0.112	0.017
Red	230	Grassland	-0.010	0.113	0.016	94	-0.010	0.112	0.016
Red	230	Cropland	-0.007	0.128	0.032	28	-0.007	0.128	0.031
Red	230	PastureHay	-0.008	0.105	0.025	50	-0.008	0.104	0.024
Red	230	Water	-0.007	0.087	0.020	54	-0.006	0.082	0.017
Red	230	Developed	-0.006	0.117	0.017	64	-0.006	0.115	0.016
Red	230	Barren	-0.009	0.175	0.025	67	-0.010	0.173	0.023
Red	230	Wetlands	-0.006	0.077	0.014	81	-0.006	0.075	0.013
Red	230	ShrubScrub	-0.009	0.112	0.016	86	-0.009	0.110	0.015
Red	230	Forest	-0.007	0.083	0.014	90	-0.007	0.085	0.013
Red	230	All	-0.009	0.117	0.020	78	-0.009	0.114	0.017
Red	240	Grassland	-0.008	0.114	0.016	87	-0.009	0.113	0.016
Red	240	Cropland	-0.007	0.130	0.031	22	-0.006	0.130	0.030
Red	240	PastureHay	-0.005	0.106	0.025	29	-0.005	0.105	0.024
Red	240	Water	-0.006	0.087	0.020	43	-0.005	0.082	0.017
Red	240	Developed	-0.006	0.116	0.018	50	-0.006	0.115	0.016
Red	240	Barren	-0.009	0.176	0.024	70	-0.010	0.173	0.022
Red	240	Wetlands	-0.005	0.078	0.014	61	-0.005	0.075	0.013
Red	240	ShrubScrub	-0.009	0.112	0.016	81	-0.008	0.110	0.015
Red	240	Forest	-0.005	0.084	0.014	66	-0.005	0.085	0.013
Red	240	All	-0.008	0.118	0.020	70	-0.008	0.114	0.017
Red	250	Grassland	-0.008	0.114	0.017	87	-0.008	0.113	0.016
Red	250	Cropland	-0.007	0.130	0.029	25	-0.006	0.130	0.028
Red	250	PastureHay	-0.006	0.106	0.025	35	-0.006	0.105	0.024
Red	250	Water	-0.006	0.087	0.020	47	-0.006	0.083	0.018
Red	250	Developed	-0.006	0.116	0.018	56	-0.006	0.114	0.017
Red	250	Barren	-0.010	0.176	0.024	72	-0.010	0.173	0.021
Red	250	Wetlands	-0.005	0.079	0.015	59	-0.005	0.077	0.014
Red	250	ShrubScrub	-0.008	0.111	0.016	80	-0.008	0.110	0.015
Red	250	Forest	-0.005	0.084	0.014	63	-0.005	0.084	0.014
Red	250	All	-0.008	0.118	0.020	71	-0.008	0.114	0.018
Red	260	Grassland	-0.007	0.115	0.017	67	-0.007	0.114	0.016
Red	260	Cropland	-0.004	0.130	0.027	14	-0.004	0.130	0.027
Red	260	PastureHay	-0.004	0.107	0.024	16	-0.004	0.106	0.024
Red	260	Water	-0.006	0.088	0.021	39	-0.005	0.084	0.018
Red	260	Developed	-0.005	0.116	0.018	38	-0.005	0.114	0.017
Red	260	Barren	-0.009	0.176	0.024	65	-0.009	0.173	0.021
Red	260	Wetlands	-0.005	0.083	0.017	24	-0.005	0.081	0.016
Red	260	ShrubScrub	-0.006	0.112	0.016	60	-0.006	0.111	0.015
Red	260	Forest	-0.004	0.086	0.015	42	-0.004	0.086	0.015
Red	260	All	-0.006	0.119	0.020	53	-0.006	0.116	0.018
Red	270	Grassland	-0.007	0.116	0.018	56	-0.006	0.115	0.017
Red	270	Cropland	-0.004	0.129	0.026	14	-0.004	0.129	0.026
Red	270	PastureHay	-0.003	0.106	0.023	8	-0.003	0.105	0.023
Red	270	Water	-0.006	0.089	0.021	34	-0.005	0.086	0.019
Red	270	Developed	-0.005	0.116	0.018	36	-0.005	0.115	0.017
Red	270	Barren	-0.009	0.175	0.024	66	-0.010	0.172	0.021
Red	270	Wetlands	-0.007	0.089	0.019	53	-0.007	0.087	0.018
Red	270	ShrubScrub	-0.006	0.111	0.016	44	-0.005	0.110	0.016
Red	270	Forest	-0.004	0.088	0.017	30	-0.003	0.088	0.016
Red	270	All	-0.006	0.119	0.020	44	-0.005	0.116	0.019
NIR	120	Grassland	0.001	0.210	0.020	2	0.001	0.211	0.018
NIR	120	Cropland	0.000	0.212	0.031	2	0.000	0.211	0.030
NIR	120	PastureHay	-0.001	0.226	0.033	2	-0.001	0.223	0.031
NIR	120	Water	-0.007	0.112	0.031	8	-0.004	0.109	0.028
NIR	120	Developed	0.003	0.229	0.021	5	0.003	0.226	0.020
NIR	120	Barren	-0.004	0.248	0.026	4	-0.003	0.244	0.023
NIR	120	Wetlands	-0.006	0.189	0.028	9	-0.006	0.186	0.027
NIR	120	ShrubScrub	-0.002	0.203	0.018	3	-0.002	0.202	0.017
NIR	120	Forest	-0.002	0.197	0.025	6	-0.001	0.196	0.024
NIR	120	All	0.001	0.217	0.024	2	0.001	0.212	0.021
NIR	130	Grassland	0.001	0.214	0.021	3	0.000	0.213	0.019
NIR	130	Cropland	-0.001	0.219	0.035	3	-0.002	0.218	0.033
NIR	130	PastureHay	-0.004	0.235	0.037	3	-0.003	0.231	0.035
NIR	130	Water	-0.008	0.115	0.032	13	-0.006	0.112	0.029
NIR	130	Developed	0.002	0.232	0.022	6	0.002	0.230	0.020
NIR	130	Barren	-0.005	0.250	0.027	7	-0.004	0.246	0.024
NIR	130	Wetlands	-0.009	0.197	0.032	18	-0.009	0.196	0.031
NIR	130	ShrubScrub	-0.003	0.206	0.019	6	-0.003	0.206	0.018
NIR	130	Forest	-0.005	0.205	0.030	11	-0.004	0.203	0.028
NIR	130	All	0.000	0.222	0.025	4	0.000	0.216	0.022
NIR	140	Grassland	0.001	0.219	0.021	4	0.000	0.217	0.018
NIR	140	Cropland	-0.001	0.228	0.037	3	-0.001	0.227	0.035
NIR	140	PastureHay	-0.003	0.245	0.038	3	-0.002	0.241	0.035
NIR	140	Water	-0.009	0.117	0.032	18	-0.006	0.113	0.029
NIR	140	Developed	0.002	0.238	0.022	6	0.002	0.236	0.020
NIR	140	Barren	-0.007	0.252	0.027	12	-0.005	0.247	0.024
NIR	140	Wetlands	-0.012	0.209	0.035	30	-0.012	0.207	0.033
NIR	140	ShrubScrub	-0.002	0.212	0.019	9	-0.003	0.211	0.018
NIR	140	Forest	-0.005	0.216	0.032	13	-0.004	0.212	0.031
NIR	140	All	0.000	0.229	0.026	4	0.000	0.221	0.022
NIR	150	Grassland	0.004	0.223	0.022	8	0.003	0.220	0.019
NIR	150	Cropland	0.004	0.241	0.044	5	0.003	0.240	0.042
NIR	150	PastureHay	0.002	0.257	0.042	5	0.002	0.254	0.040
NIR	150	Water	-0.007	0.120	0.032	10	-0.004	0.116	0.029
NIR	150	Developed	0.005	0.243	0.023	14	0.005	0.240	0.021
NIR	150	Barren	-0.006	0.252	0.026	17	-0.005	0.248	0.023
NIR	150	Wetlands	-0.006	0.223	0.040	5	-0.006	0.218	0.039
NIR	150	ShrubScrub	0.000	0.218	0.020	7	0.000	0.216	0.018
NIR	150	Forest	0.000	0.228	0.036	4	0.000	0.224	0.035
NIR	150	All	0.004	0.234	0.028	8	0.003	0.226	0.023
NIR	160	Grassland	0.007	0.225	0.022	20	0.006	0.222	0.020
NIR	160	Cropland	0.002	0.256	0.050	6	0.002	0.255	0.048
NIR	160	PastureHay	0.005	0.265	0.046	7	0.004	0.263	0.044
NIR	160	Water	-0.007	0.124	0.033	11	-0.004	0.122	0.030
NIR	160	Developed	0.007	0.245	0.023	26	0.007	0.243	0.021
NIR	160	Barren	-0.006	0.252	0.026	25	-0.006	0.248	0.022
NIR	160	Wetlands	0.000	0.241	0.037	6	-0.001	0.234	0.036
NIR	160	ShrubScrub	0.003	0.221	0.020	8	0.002	0.218	0.018
NIR	160	Forest	0.003	0.247	0.033	5	0.003	0.243	0.032
NIR	160	All	0.006	0.238	0.029	17	0.006	0.229	0.024
NIR	170	Grassland	0.009	0.224	0.023	47	0.008	0.221	0.020
NIR	170	Cropland	0.004	0.265	0.052	11	0.004	0.264	0.050
NIR	170	PastureHay	0.016	0.269	0.047	37	0.015	0.268	0.046
NIR	170	Water	-0.007	0.125	0.033	19	-0.004	0.123	0.030
NIR	170	Developed	0.009	0.245	0.024	42	0.009	0.242	0.021
NIR	170	Barren	-0.006	0.248	0.026	33	-0.006	0.244	0.022
NIR	170	Wetlands	0.008	0.250	0.035	22	0.008	0.244	0.034
NIR	170	ShrubScrub	0.006	0.221	0.021	28	0.005	0.217	0.019
NIR	170	Forest	0.010	0.252	0.029	38	0.010	0.247	0.027
NIR	170	All	0.009	0.239	0.030	39	0.008	0.229	0.025
NIR	180	Grassland	0.009	0.223	0.023	55	0.009	0.220	0.021
NIR	180	Cropland	0.005	0.263	0.052	12	0.005	0.262	0.051
NIR	180	PastureHay	0.018	0.264	0.048	50	0.018	0.263	0.046
NIR	180	Water	-0.006	0.124	0.034	22	-0.004	0.124	0.030
NIR	180	Developed	0.009	0.242	0.024	47	0.009	0.240	0.022
NIR	180	Barren	-0.006	0.248	0.026	39	-0.007	0.244	0.022
NIR	180	Wetlands	0.008	0.252	0.034	30	0.008	0.246	0.031
NIR	180	ShrubScrub	0.007	0.221	0.020	44	0.006	0.217	0.018
NIR	180	Forest	0.011	0.252	0.028	58	0.011	0.246	0.026
NIR	180	All	0.009	0.237	0.030	45	0.009	0.227	0.025
NIR	190	Grassland	0.008	0.220	0.023	53	0.008	0.218	0.021
NIR	190	Cropland	0.005	0.260	0.052	13	0.005	0.259	0.051
NIR	190	PastureHay	0.019	0.258	0.047	55	0.019	0.256	0.045
NIR	190	Water	-0.006	0.123	0.033	22	-0.003	0.122	0.029
NIR	190	Developed	0.008	0.239	0.024	47	0.008	0.237	0.022
NIR	190	Barren	-0.006	0.246	0.028	25	-0.005	0.242	0.025
NIR	190	Wetlands	0.009	0.253	0.034	38	0.009	0.249	0.031
NIR	190	ShrubScrub	0.006	0.219	0.021	40	0.005	0.216	0.019
NIR	190	Forest	0.010	0.248	0.027	60	0.010	0.244	0.026
NIR	190	All	0.008	0.235	0.030	44	0.008	0.225	0.025
NIR	200	Grassland	0.008	0.217	0.023	51	0.007	0.215	0.021
NIR	200	Cropland	0.006	0.257	0.051	15	0.006	0.256	0.050
NIR	200	PastureHay	0.019	0.253	0.045	59	0.019	0.252	0.044
NIR	200	Water	-0.006	0.123	0.033	25	-0.003	0.124	0.029
NIR	200	Developed	0.009	0.237	0.024	53	0.008	0.234	0.022
NIR	200	Barren	-0.005	0.244	0.028	17	-0.004	0.240	0.026
NIR	200	Wetlands	0.010	0.250	0.032	48	0.010	0.247	0.029
NIR	200	ShrubScrub	0.006	0.216	0.021	37	0.005	0.214	0.019
NIR	200	Forest	0.010	0.243	0.027	65	0.010	0.239	0.025
NIR	200	All	0.008	0.232	0.030	43	0.007	0.223	0.025
NIR	210	Grassland	0.007	0.211	0.023	44	0.006	0.210	0.021
NIR	210	Cropland	0.005	0.248	0.049	12	0.004	0.247	0.049
NIR	210	PastureHay	0.017	0.245	0.044	51	0.017	0.243	0.043
NIR	210	Water	-0.006	0.122	0.034	23	-0.003	0.123	0.030
NIR	210	Developed	0.008	0.231	0.024	48	0.008	0.229	0.022
NIR	210	Barren	-0.005	0.242	0.027	19	-0.005	0.238	0.025
NIR	210	Wetlands	0.010	0.246	0.031	49	0.010	0.245	0.030
NIR	210	ShrubScrub	0.006	0.211	0.020	36	0.005	0.209	0.019
NIR	210	Forest	0.010	0.234	0.027	64	0.010	0.230	0.026
NIR	210	All	0.007	0.226	0.029	37	0.006	0.218	0.024
NIR	220	Grassland	0.005	0.206	0.022	37	0.005	0.206	0.020
NIR	220	Cropland	0.004	0.243	0.047	14	0.004	0.242	0.046
NIR	220	PastureHay	0.017	0.238	0.041	57	0.017	0.236	0.039
NIR	220	Water	-0.006	0.121	0.033	25	-0.003	0.123	0.029
NIR	220	Developed	0.008	0.227	0.023	50	0.007	0.225	0.021
NIR	220	Barren	-0.004	0.241	0.027	17	-0.003	0.238	0.024
NIR	220	Wetlands	0.010	0.239	0.030	50	0.009	0.238	0.028
NIR	220	ShrubScrub	0.005	0.206	0.020	35	0.005	0.205	0.019
NIR	220	Forest	0.008	0.225	0.026	56	0.008	0.221	0.025
NIR	220	All	0.006	0.221	0.028	33	0.005	0.213	0.023
NIR	230	Grassland	0.004	0.201	0.020	32	0.004	0.201	0.019
NIR	230	Cropland	0.005	0.237	0.045	13	0.004	0.237	0.044
NIR	230	PastureHay	0.012	0.231	0.039	42	0.012	0.229	0.038
NIR	230	Water	-0.006	0.119	0.032	27	-0.003	0.121	0.029
NIR	230	Developed	0.008	0.224	0.022	51	0.007	0.221	0.020
NIR	230	Barren	-0.004	0.239	0.025	21	-0.003	0.236	0.022
NIR	230	Wetlands	0.009	0.230	0.027	47	0.008	0.230	0.026
NIR	230	ShrubScrub	0.005	0.200	0.019	35	0.004	0.200	0.017
NIR	230	Forest	0.007	0.216	0.023	55	0.007	0.212	0.021
NIR	230	All	0.005	0.214	0.026	29	0.004	0.208	0.021
NIR	240	Grassland	0.004	0.199	0.020	24	0.003	0.198	0.019
NIR	240	Cropland	0.005	0.233	0.044	11	0.004	0.233	0.043
NIR	240	PastureHay	0.013	0.225	0.040	41	0.013	0.222	0.038
NIR	240	Water	-0.006	0.116	0.032	25	-0.003	0.119	0.029
NIR	240	Developed	0.007	0.221	0.022	45	0.007	0.218	0.021
NIR	240	Barren	-0.005	0.239	0.024	25	-0.004	0.235	0.021
NIR	240	Wetlands	0.008	0.224	0.028	36	0.007	0.223	0.026
NIR	240	ShrubScrub	0.005	0.196	0.019	32	0.004	0.197	0.018
NIR	240	Forest	0.006	0.209	0.022	41	0.006	0.206	0.021
NIR	240	All	0.004	0.210	0.026	23	0.004	0.205	0.021
NIR	250	Grassland	0.002	0.195	0.020	16	0.001	0.195	0.019
NIR	250	Cropland	0.002	0.224	0.042	8	0.002	0.224	0.042
NIR	250	PastureHay	0.010	0.215	0.038	30	0.010	0.213	0.037
NIR	250	Water	-0.008	0.113	0.031	30	-0.005	0.116	0.028
NIR	250	Developed	0.006	0.217	0.022	37	0.005	0.214	0.021
NIR	250	Barren	-0.006	0.236	0.024	43	-0.006	0.232	0.020
NIR	250	Wetlands	0.002	0.214	0.031	15	0.002	0.213	0.029
NIR	250	ShrubScrub	0.001	0.189	0.019	14	0.001	0.190	0.018
NIR	250	Forest	0.003	0.201	0.023	20	0.003	0.197	0.023
NIR	250	All	0.002	0.204	0.026	16	0.002	0.201	0.022
NIR	260	Grassland	0.001	0.191	0.020	11	0.001	0.191	0.018
NIR	260	Cropland	0.002	0.217	0.039	7	0.002	0.217	0.039
NIR	260	PastureHay	0.009	0.208	0.035	26	0.008	0.206	0.034
NIR	260	Water	-0.008	0.110	0.030	27	-0.005	0.113	0.027
NIR	260	Developed	0.005	0.214	0.022	32	0.005	0.210	0.020
NIR	260	Barren	-0.007	0.233	0.024	50	-0.007	0.229	0.020
NIR	260	Wetlands	-0.002	0.206	0.029	11	-0.002	0.205	0.029
NIR	260	ShrubScrub	-0.001	0.183	0.019	11	-0.001	0.185	0.018
NIR	260	Forest	0.000	0.192	0.023	12	0.000	0.191	0.022
NIR	260	All	0.001	0.198	0.025	12	0.001	0.197	0.021
NIR	270	Grassland	0.000	0.189	0.020	15	0.000	0.188	0.018
NIR	270	Cropland	0.004	0.210	0.038	9	0.004	0.210	0.037
NIR	270	PastureHay	0.011	0.201	0.034	28	0.010	0.200	0.032
NIR	270	Water	-0.008	0.109	0.030	27	-0.005	0.111	0.027
NIR	270	Developed	0.005	0.211	0.021	33	0.005	0.208	0.020
NIR	270	Barren	-0.008	0.231	0.024	55	-0.009	0.226	0.021
NIR	270	Wetlands	-0.006	0.197	0.025	25	-0.006	0.197	0.025
NIR	270	ShrubScrub	0.000	0.177	0.018	14	0.000	0.179	0.017
NIR	270	Forest	-0.001	0.184	0.022	15	-0.001	0.185	0.021
NIR	270	All	0.001	0.194	0.024	15	0.001	0.193	0.021
SWIR1	120	Grassland	-0.011	0.271	0.023	46	-0.010	0.275	0.022
SWIR1	120	Cropland	-0.003	0.285	0.036	5	-0.002	0.287	0.035
SWIR1	120	PastureHay	-0.003	0.266	0.035	5	-0.002	0.264	0.033
SWIR1	120	Water	-0.014	0.105	0.039	21	-0.011	0.096	0.035
SWIR1	120	Developed	-0.007	0.250	0.022	24	-0.006	0.249	0.021
SWIR1	120	Barren	-0.017	0.289	0.037	29	-0.013	0.294	0.028
SWIR1	120	Wetlands	-0.023	0.215	0.038	69	-0.022	0.212	0.036
SWIR1	120	ShrubScrub	-0.009	0.250	0.020	30	-0.008	0.252	0.018
SWIR1	120	Forest	-0.009	0.220	0.025	31	-0.008	0.220	0.024
SWIR1	120	All	-0.009	0.264	0.027	34	-0.009	0.275	0.024
SWIR1	130	Grassland	-0.009	0.266	0.024	41	-0.009	0.270	0.023
SWIR1	130	Cropland	-0.001	0.282	0.038	5	0.000	0.283	0.037
SWIR1	130	PastureHay	0.001	0.258	0.038	5	0.002	0.256	0.037
SWIR1	130	Water	-0.014	0.104	0.039	27	-0.012	0.095	0.036
SWIR1	130	Developed	-0.005	0.246	0.024	19	-0.005	0.244	0.022
SWIR1	130	Barren	-0.017	0.289	0.036	38	-0.013	0.293	0.028
SWIR1	130	Wetlands	-0.020	0.204	0.040	59	-0.019	0.201	0.038
SWIR1	130	ShrubScrub	-0.007	0.247	0.021	25	-0.007	0.248	0.020
SWIR1	130	Forest	-0.006	0.213	0.027	19	-0.006	0.214	0.026
SWIR1	130	All	-0.007	0.261	0.028	30	-0.007	0.270	0.026
SWIR1	140	Grassland	-0.012	0.258	0.026	53	-0.012	0.263	0.025
SWIR1	140	Cropland	-0.001	0.279	0.041	8	0.000	0.280	0.039
SWIR1	140	PastureHay	-0.002	0.251	0.040	8	-0.001	0.250	0.039
SWIR1	140	Water	-0.016	0.101	0.037	37	-0.013	0.090	0.034
SWIR1	140	Developed	-0.007	0.240	0.024	22	-0.007	0.238	0.023
SWIR1	140	Barren	-0.022	0.284	0.041	55	-0.018	0.288	0.035
SWIR1	140	Wetlands	-0.018	0.189	0.038	46	-0.018	0.185	0.037
SWIR1	140	ShrubScrub	-0.012	0.240	0.024	48	-0.011	0.241	0.023
SWIR1	140	Forest	-0.008	0.204	0.029	31	-0.008	0.202	0.027
SWIR1	140	All	-0.010	0.256	0.031	40	-0.010	0.263	0.028
SWIR1	150	Grassland	-0.016	0.250	0.027	68	-0.015	0.254	0.026
SWIR1	150	Cropland	-0.001	0.266	0.048	9	0.000	0.267	0.047
SWIR1	150	PastureHay	-0.002	0.236	0.042	12	-0.003	0.234	0.040
SWIR1	150	Water	-0.015	0.097	0.035	34	-0.013	0.087	0.032
SWIR1	150	Developed	-0.010	0.232	0.024	41	-0.010	0.230	0.023
SWIR1	150	Barren	-0.025	0.280	0.040	71	-0.023	0.284	0.033
SWIR1	150	Wetlands	-0.019	0.178	0.036	51	-0.020	0.173	0.035
SWIR1	150	ShrubScrub	-0.014	0.232	0.024	62	-0.014	0.232	0.023
SWIR1	150	Forest	-0.011	0.193	0.028	41	-0.010	0.192	0.027
SWIR1	150	All	-0.013	0.249	0.032	53	-0.014	0.253	0.028
SWIR1	160	Grassland	-0.018	0.242	0.026	78	-0.018	0.244	0.025
SWIR1	160	Cropland	0.001	0.247	0.054	9	0.001	0.246	0.053
SWIR1	160	PastureHay	0.000	0.218	0.042	12	0.000	0.216	0.039
SWIR1	160	Water	-0.015	0.093	0.034	36	-0.013	0.084	0.030
SWIR1	160	Developed	-0.010	0.224	0.024	45	-0.010	0.222	0.022
SWIR1	160	Barren	-0.025	0.281	0.039	74	-0.024	0.284	0.031
SWIR1	160	Wetlands	-0.018	0.163	0.027	68	-0.019	0.160	0.025
SWIR1	160	ShrubScrub	-0.016	0.224	0.023	75	-0.016	0.225	0.022
SWIR1	160	Forest	-0.011	0.180	0.023	52	-0.010	0.179	0.022
SWIR1	160	All	-0.014	0.241	0.033	59	-0.016	0.242	0.028
SWIR1	170	Grassland	-0.024	0.237	0.026	95	-0.024	0.238	0.024
SWIR1	170	Cropland	-0.005	0.231	0.056	16	-0.006	0.229	0.056
SWIR1	170	PastureHay	-0.010	0.209	0.043	31	-0.010	0.207	0.040
SWIR1	170	Water	-0.015	0.090	0.032	49	-0.014	0.080	0.029
SWIR1	170	Developed	-0.014	0.221	0.025	63	-0.014	0.220	0.022
SWIR1	170	Barren	-0.027	0.278	0.039	83	-0.026	0.280	0.031
SWIR1	170	Wetlands	-0.018	0.158	0.024	90	-0.017	0.154	0.023
SWIR1	170	ShrubScrub	-0.020	0.218	0.023	93	-0.020	0.218	0.021
SWIR1	170	Forest	-0.015	0.174	0.022	82	-0.014	0.172	0.021
SWIR1	170	All	-0.020	0.236	0.033	76	-0.022	0.235	0.027
SWIR1	180	Grassland	-0.024	0.237	0.027	97	-0.024	0.239	0.026
SWIR1	180	Cropland	-0.008	0.225	0.054	19	-0.008	0.224	0.055
SWIR1	180	PastureHay	-0.014	0.210	0.043	42	-0.013	0.208	0.041
SWIR1	180	Water	-0.015	0.089	0.032	52	-0.013	0.079	0.029
SWIR1	180	Developed	-0.013	0.223	0.026	65	-0.013	0.222	0.024
SWIR1	180	Barren	-0.025	0.281	0.040	84	-0.026	0.283	0.032
SWIR1	180	Wetlands	-0.017	0.157	0.024	91	-0.016	0.153	0.023
SWIR1	180	ShrubScrub	-0.021	0.219	0.023	95	-0.020	0.219	0.022
SWIR1	180	Forest	-0.015	0.173	0.022	90	-0.015	0.172	0.020
SWIR1	180	All	-0.020	0.236	0.034	79	-0.022	0.235	0.029
SWIR1	190	Grassland	-0.024	0.241	0.027	97	-0.024	0.243	0.026
SWIR1	190	Cropland	-0.011	0.225	0.051	26	-0.012	0.224	0.051
SWIR1	190	PastureHay	-0.016	0.212	0.040	56	-0.016	0.210	0.040
SWIR1	190	Water	-0.014	0.087	0.031	51	-0.011	0.076	0.028
SWIR1	190	Developed	-0.013	0.226	0.027	67	-0.013	0.226	0.025
SWIR1	190	Barren	-0.022	0.284	0.040	84	-0.021	0.286	0.033
SWIR1	190	Wetlands	-0.016	0.156	0.024	87	-0.014	0.152	0.023
SWIR1	190	ShrubScrub	-0.020	0.221	0.024	95	-0.020	0.221	0.023
SWIR1	190	Forest	-0.015	0.174	0.021	95	-0.015	0.173	0.020
SWIR1	190	All	-0.021	0.237	0.033	81	-0.022	0.239	0.029
SWIR1	200	Grassland	-0.025	0.245	0.027	98	-0.025	0.248	0.026
SWIR1	200	Cropland	-0.016	0.231	0.050	39	-0.016	0.229	0.051
SWIR1	200	PastureHay	-0.020	0.219	0.041	69	-0.020	0.217	0.040
SWIR1	200	Water	-0.014	0.089	0.030	54	-0.012	0.079	0.028
SWIR1	200	Developed	-0.014	0.231	0.026	76	-0.014	0.231	0.024
SWIR1	200	Barren	-0.021	0.286	0.040	81	-0.019	0.288	0.034
SWIR1	200	Wetlands	-0.017	0.158	0.023	96	-0.015	0.153	0.021
SWIR1	200	ShrubScrub	-0.021	0.223	0.025	94	-0.020	0.224	0.023
SWIR1	200	Forest	-0.016	0.177	0.022	97	-0.016	0.176	0.020
SWIR1	200	All	-0.023	0.241	0.033	86	-0.023	0.245	0.029
SWIR1	210	Grassland	-0.023	0.247	0.026	97	-0.023	0.251	0.025
SWIR1	210	Cropland	-0.016	0.236	0.051	36	-0.016	0.233	0.051
SWIR1	210	PastureHay	-0.019	0.222	0.042	59	-0.019	0.221	0.041
SWIR1	210	Water	-0.014	0.089	0.032	49	-0.012	0.079	0.029
SWIR1	210	Developed	-0.014	0.232	0.026	74	-0.014	0.233	0.024
SWIR1	210	Barren	-0.020	0.287	0.039	77	-0.018	0.289	0.033
SWIR1	210	Wetlands	-0.016	0.157	0.024	93	-0.014	0.153	0.022
SWIR1	210	ShrubScrub	-0.019	0.224	0.024	88	-0.018	0.224	0.023
SWIR1	210	Forest	-0.015	0.176	0.022	96	-0.015	0.175	0.020
SWIR1	210	All	-0.021	0.243	0.032	83	-0.021	0.247	0.028
SWIR1	220	Grassland	-0.021	0.250	0.025	97	-0.021	0.255	0.024
SWIR1	220	Cropland	-0.017	0.248	0.050	43	-0.016	0.246	0.049
SWIR1	220	PastureHay	-0.018	0.230	0.039	63	-0.017	0.228	0.037
SWIR1	220	Water	-0.013	0.091	0.032	51	-0.012	0.082	0.029
SWIR1	220	Developed	-0.013	0.234	0.024	77	-0.013	0.236	0.022
SWIR1	220	Barren	-0.016	0.290	0.037	71	-0.014	0.292	0.032
SWIR1	220	Wetlands	-0.015	0.157	0.023	94	-0.014	0.153	0.022
SWIR1	220	ShrubScrub	-0.016	0.227	0.024	86	-0.016	0.228	0.023
SWIR1	220	Forest	-0.014	0.175	0.022	95	-0.013	0.175	0.020
SWIR1	220	All	-0.020	0.247	0.031	85	-0.020	0.252	0.027
SWIR1	230	Grassland	-0.017	0.252	0.024	95	-0.017	0.257	0.022
SWIR1	230	Cropland	-0.011	0.255	0.048	26	-0.010	0.255	0.047
SWIR1	230	PastureHay	-0.014	0.234	0.037	50	-0.013	0.232	0.036
SWIR1	230	Water	-0.012	0.092	0.032	50	-0.011	0.083	0.029
SWIR1	230	Developed	-0.010	0.235	0.023	65	-0.010	0.236	0.022
SWIR1	230	Barren	-0.014	0.292	0.034	69	-0.012	0.293	0.027
SWIR1	230	Wetlands	-0.013	0.157	0.023	91	-0.012	0.152	0.022
SWIR1	230	ShrubScrub	-0.014	0.228	0.022	81	-0.013	0.228	0.021
SWIR1	230	Forest	-0.011	0.174	0.022	85	-0.011	0.174	0.020
SWIR1	230	All	-0.016	0.249	0.029	78	-0.016	0.255	0.025
SWIR1	240	Grassland	-0.016	0.253	0.024	93	-0.016	0.258	0.022
SWIR1	240	Cropland	-0.011	0.261	0.046	24	-0.010	0.261	0.046
SWIR1	240	PastureHay	-0.012	0.236	0.037	43	-0.012	0.234	0.035
SWIR1	240	Water	-0.012	0.093	0.032	45	-0.010	0.085	0.030
SWIR1	240	Developed	-0.010	0.235	0.023	61	-0.010	0.237	0.022
SWIR1	240	Barren	-0.014	0.294	0.033	68	-0.012	0.295	0.026
SWIR1	240	Wetlands	-0.012	0.158	0.022	86	-0.012	0.152	0.020
SWIR1	240	ShrubScrub	-0.013	0.228	0.022	79	-0.013	0.229	0.020
SWIR1	240	Forest	-0.010	0.174	0.022	78	-0.009	0.173	0.020
SWIR1	240	All	-0.015	0.251	0.029	76	-0.015	0.258	0.025
SWIR1	250	Grassland	-0.016	0.254	0.024	92	-0.016	0.259	0.022
SWIR1	250	Cropland	-0.008	0.265	0.043	22	-0.008	0.266	0.043
SWIR1	250	PastureHay	-0.011	0.237	0.034	47	-0.011	0.235	0.032
SWIR1	250	Water	-0.012	0.094	0.033	48	-0.010	0.086	0.030
SWIR1	250	Developed	-0.010	0.235	0.023	62	-0.010	0.237	0.022
SWIR1	250	Barren	-0.015	0.294	0.032	75	-0.013	0.295	0.024
SWIR1	250	Wetlands	-0.010	0.160	0.022	67	-0.009	0.154	0.021
SWIR1	250	ShrubScrub	-0.014	0.227	0.021	84	-0.013	0.228	0.020
SWIR1	250	Forest	-0.009	0.173	0.022	69	-0.008	0.172	0.020
SWIR1	250	All	-0.014	0.252	0.028	75	-0.014	0.259	0.025
SWIR1	260	Grassland	-0.014	0.255	0.023	87	-0.013	0.260	0.022
SWIR1	260	Cropland	-0.006	0.268	0.040	16	-0.006	0.269	0.040
SWIR1	260	PastureHay	-0.008	0.240	0.033	32	-0.008	0.237	0.032
SWIR1	260	Water	-0.011	0.094	0.033	39	-0.009	0.087	0.031
SWIR1	260	Developed	-0.008	0.235	0.023	48	-0.008	0.237	0.022
SWIR1	260	Barren	-0.013	0.294	0.031	67	-0.012	0.294	0.024
SWIR1	260	Wetlands	-0.006	0.163	0.024	30	-0.006	0.156	0.023
SWIR1	260	ShrubScrub	-0.012	0.226	0.020	82	-0.011	0.228	0.019
SWIR1	260	Forest	-0.006	0.174	0.023	47	-0.006	0.174	0.021
SWIR1	260	All	-0.012	0.253	0.027	68	-0.012	0.260	0.025
SWIR1	270	Grassland	-0.013	0.256	0.023	82	-0.013	0.261	0.022
SWIR1	270	Cropland	-0.004	0.266	0.039	12	-0.004	0.267	0.039
SWIR1	270	PastureHay	-0.005	0.240	0.031	20	-0.006	0.238	0.030
SWIR1	270	Water	-0.012	0.096	0.033	37	-0.009	0.089	0.031
SWIR1	270	Developed	-0.008	0.235	0.023	42	-0.008	0.238	0.022
SWIR1	270	Barren	-0.014	0.292	0.033	68	-0.013	0.292	0.025
SWIR1	270	Wetlands	-0.009	0.172	0.026	32	-0.008	0.166	0.025
SWIR1	270	ShrubScrub	-0.010	0.224	0.020	70	-0.010	0.227	0.019
SWIR1	270	Forest	-0.006	0.176	0.024	39	-0.006	0.177	0.024
SWIR1	270	All	-0.011	0.253	0.027	63	-0.012	0.260	0.025
SWIR2	120	Grassland	-0.010	0.184	0.024	34	-0.009	0.184	0.023
SWIR2	120	Cropland	-0.003	0.224	0.036	4	-0.002	0.228	0.034
SWIR2	120	PastureHay	-0.002	0.183	0.041	3	-0.002	0.180	0.040
SWIR2	120	Water	-0.010	0.074	0.030	18	-0.008	0.068	0.027
SWIR2	120	Developed	-0.006	0.178	0.023	19	-0.006	0.174	0.021
SWIR2	120	Barren	-0.015	0.234	0.039	18	-0.012	0.233	0.033
SWIR2	120	Wetlands	-0.015	0.144	0.031	37	-0.014	0.143	0.030
SWIR2	120	ShrubScrub	-0.007	0.175	0.020	16	-0.007	0.175	0.019
SWIR2	120	Forest	-0.006	0.146	0.023	16	-0.006	0.144	0.022
SWIR2	120	All	-0.008	0.190	0.028	25	-0.008	0.187	0.025
SWIR2	130	Grassland	-0.009	0.180	0.026	37	-0.009	0.179	0.024
SWIR2	130	Cropland	-0.002	0.220	0.039	5	-0.001	0.224	0.037
SWIR2	130	PastureHay	0.002	0.174	0.044	3	0.002	0.171	0.044
SWIR2	130	Water	-0.011	0.073	0.030	25	-0.009	0.067	0.028
SWIR2	130	Developed	-0.005	0.174	0.024	18	-0.005	0.169	0.022
SWIR2	130	Barren	-0.016	0.234	0.039	27	-0.012	0.233	0.033
SWIR2	130	Wetlands	-0.012	0.134	0.034	28	-0.012	0.132	0.033
SWIR2	130	ShrubScrub	-0.006	0.172	0.022	16	-0.005	0.172	0.021
SWIR2	130	Forest	-0.004	0.140	0.026	12	-0.004	0.138	0.025
SWIR2	130	All	-0.007	0.186	0.030	27	-0.007	0.182	0.027
SWIR2	140	Grassland	-0.011	0.171	0.026	45	-0.011	0.171	0.025
SWIR2	140	Cropland	-0.002	0.215	0.044	6	-0.002	0.218	0.042
SWIR2	140	PastureHay	-0.001	0.165	0.046	7	0.000	0.162	0.046
SWIR2	140	Water	-0.012	0.070	0.028	34	-0.010	0.063	0.026
SWIR2	140	Developed	-0.006	0.166	0.024	20	-0.006	0.162	0.022
SWIR2	140	Barren	-0.020	0.227	0.043	42	-0.018	0.225	0.038
SWIR2	140	Wetlands	-0.010	0.119	0.032	19	-0.010	0.115	0.032
SWIR2	140	ShrubScrub	-0.010	0.163	0.023	34	-0.009	0.163	0.022
SWIR2	140	Forest	-0.005	0.128	0.027	16	-0.005	0.126	0.026
SWIR2	140	All	-0.009	0.178	0.032	34	-0.010	0.173	0.027
SWIR2	150	Grassland	-0.015	0.161	0.026	66	-0.014	0.161	0.025
SWIR2	150	Cropland	-0.004	0.199	0.053	9	-0.003	0.201	0.053
SWIR2	150	PastureHay	-0.001	0.150	0.047	11	-0.003	0.148	0.047
SWIR2	150	Water	-0.011	0.067	0.027	33	-0.010	0.060	0.025
SWIR2	150	Developed	-0.009	0.158	0.024	40	-0.009	0.154	0.021
SWIR2	150	Barren	-0.023	0.223	0.041	65	-0.022	0.221	0.036
SWIR2	150	Wetlands	-0.012	0.107	0.031	25	-0.013	0.103	0.030
SWIR2	150	ShrubScrub	-0.012	0.154	0.024	56	-0.012	0.153	0.023
SWIR2	150	Forest	-0.008	0.117	0.026	31	-0.008	0.115	0.026
SWIR2	150	All	-0.013	0.167	0.033	51	-0.013	0.164	0.027
SWIR2	160	Grassland	-0.018	0.153	0.025	79	-0.018	0.153	0.024
SWIR2	160	Cropland	-0.001	0.176	0.059	8	-0.001	0.175	0.060
SWIR2	160	PastureHay	0.001	0.133	0.044	12	0.000	0.130	0.043
SWIR2	160	Water	-0.012	0.063	0.026	37	-0.010	0.057	0.023
SWIR2	160	Developed	-0.010	0.151	0.023	47	-0.010	0.147	0.021
SWIR2	160	Barren	-0.026	0.225	0.040	73	-0.025	0.224	0.035
SWIR2	160	Wetlands	-0.013	0.090	0.020	67	-0.013	0.085	0.019
SWIR2	160	ShrubScrub	-0.016	0.148	0.022	75	-0.015	0.146	0.021
SWIR2	160	Forest	-0.009	0.104	0.021	44	-0.008	0.103	0.019
SWIR2	160	All	-0.014	0.154	0.033	60	-0.016	0.154	0.026
SWIR2	170	Grassland	-0.023	0.148	0.024	96	-0.023	0.148	0.022
SWIR2	170	Cropland	-0.007	0.159	0.059	18	-0.008	0.157	0.059
SWIR2	170	PastureHay	-0.010	0.126	0.043	30	-0.010	0.124	0.041
SWIR2	170	Water	-0.012	0.060	0.024	52	-0.011	0.053	0.021
SWIR2	170	Developed	-0.014	0.148	0.023	69	-0.014	0.145	0.020
SWIR2	170	Barren	-0.026	0.222	0.040	82	-0.026	0.220	0.036
SWIR2	170	Wetlands	-0.014	0.084	0.018	92	-0.013	0.079	0.016
SWIR2	170	ShrubScrub	-0.019	0.142	0.021	93	-0.018	0.140	0.019
SWIR2	170	Forest	-0.013	0.098	0.019	87	-0.013	0.098	0.018
SWIR2	170	All	-0.020	0.147	0.031	77	-0.022	0.148	0.025
SWIR2	180	Grassland	-0.024	0.148	0.025	97	-0.024	0.148	0.023
SWIR2	180	Cropland	-0.009	0.153	0.057	22	-0.010	0.151	0.057
SWIR2	180	PastureHay	-0.013	0.127	0.043	38	-0.012	0.125	0.043
SWIR2	180	Water	-0.012	0.059	0.023	56	-0.011	0.052	0.021
SWIR2	180	Developed	-0.014	0.149	0.024	72	-0.014	0.147	0.022
SWIR2	180	Barren	-0.025	0.225	0.041	84	-0.026	0.223	0.037
SWIR2	180	Wetlands	-0.013	0.083	0.018	93	-0.013	0.078	0.017
SWIR2	180	ShrubScrub	-0.020	0.142	0.022	96	-0.019	0.141	0.020
SWIR2	180	Forest	-0.014	0.097	0.019	94	-0.013	0.097	0.017
SWIR2	180	All	-0.021	0.147	0.032	80	-0.022	0.148	0.026
SWIR2	190	Grassland	-0.023	0.151	0.025	98	-0.023	0.151	0.023
SWIR2	190	Cropland	-0.012	0.152	0.053	30	-0.013	0.150	0.053
SWIR2	190	PastureHay	-0.016	0.128	0.040	56	-0.016	0.127	0.040
SWIR2	190	Water	-0.011	0.058	0.022	55	-0.009	0.049	0.020
SWIR2	190	Developed	-0.014	0.152	0.024	75	-0.013	0.150	0.022
SWIR2	190	Barren	-0.023	0.226	0.041	85	-0.023	0.225	0.037
SWIR2	190	Wetlands	-0.012	0.082	0.018	90	-0.011	0.077	0.016
SWIR2	190	ShrubScrub	-0.019	0.143	0.023	96	-0.019	0.141	0.021
SWIR2	190	Forest	-0.014	0.098	0.018	95	-0.013	0.098	0.017
SWIR2	190	All	-0.021	0.149	0.031	82	-0.022	0.150	0.026
SWIR2	200	Grassland	-0.024	0.155	0.025	98	-0.024	0.156	0.023
SWIR2	200	Cropland	-0.015	0.155	0.051	37	-0.015	0.153	0.051
SWIR2	200	PastureHay	-0.018	0.133	0.040	64	-0.018	0.132	0.039
SWIR2	200	Water	-0.011	0.058	0.022	55	-0.009	0.050	0.020
SWIR2	200	Developed	-0.014	0.154	0.024	77	-0.014	0.153	0.022
SWIR2	200	Barren	-0.021	0.228	0.042	77	-0.019	0.226	0.038
SWIR2	200	Wetlands	-0.013	0.083	0.018	94	-0.012	0.078	0.016
SWIR2	200	ShrubScrub	-0.019	0.144	0.023	95	-0.018	0.143	0.021
SWIR2	200	Forest	-0.014	0.100	0.019	96	-0.014	0.100	0.018
SWIR2	200	All	-0.021	0.154	0.031	85	-0.022	0.155	0.026
SWIR2	210	Grassland	-0.022	0.158	0.025	97	-0.022	0.159	0.023
SWIR2	210	Cropland	-0.015	0.160	0.050	33	-0.015	0.157	0.050
SWIR2	210	PastureHay	-0.017	0.137	0.041	53	-0.017	0.135	0.041
SWIR2	210	Water	-0.011	0.059	0.023	51	-0.009	0.050	0.022
SWIR2	210	Developed	-0.013	0.156	0.024	74	-0.013	0.155	0.022
SWIR2	210	Barren	-0.021	0.232	0.041	77	-0.021	0.230	0.037
SWIR2	210	Wetlands	-0.012	0.083	0.018	90	-0.011	0.078	0.017
SWIR2	210	ShrubScrub	-0.019	0.147	0.023	93	-0.019	0.145	0.022
SWIR2	210	Forest	-0.013	0.100	0.019	94	-0.013	0.102	0.018
SWIR2	210	All	-0.020	0.158	0.031	82	-0.021	0.158	0.026
SWIR2	220	Grassland	-0.021	0.162	0.024	98	-0.021	0.162	0.022
SWIR2	220	Cropland	-0.016	0.170	0.047	43	-0.016	0.167	0.048
SWIR2	220	PastureHay	-0.017	0.143	0.037	63	-0.017	0.142	0.037
SWIR2	220	Water	-0.011	0.060	0.023	53	-0.009	0.052	0.022
SWIR2	220	Developed	-0.013	0.158	0.022	79	-0.013	0.158	0.021
SWIR2	220	Barren	-0.019	0.234	0.039	80	-0.018	0.232	0.035
SWIR2	220	Wetlands	-0.012	0.083	0.018	94	-0.010	0.079	0.017
SWIR2	220	ShrubScrub	-0.018	0.150	0.022	95	-0.017	0.149	0.021
SWIR2	220	Forest	-0.012	0.101	0.019	94	-0.012	0.103	0.017
SWIR2	220	All	-0.019	0.163	0.029	85	-0.020	0.163	0.025
SWIR2	230	Grassland	-0.019	0.165	0.023	97	-0.019	0.166	0.022
SWIR2	230	Cropland	-0.013	0.177	0.046	36	-0.013	0.176	0.046
SWIR2	230	PastureHay	-0.014	0.148	0.036	56	-0.014	0.146	0.036
SWIR2	230	Water	-0.010	0.061	0.023	54	-0.009	0.054	0.022
SWIR2	230	Developed	-0.012	0.159	0.022	77	-0.012	0.159	0.021
SWIR2	230	Barren	-0.018	0.236	0.036	80	-0.018	0.234	0.031
SWIR2	230	Wetlands	-0.011	0.085	0.018	93	-0.010	0.080	0.017
SWIR2	230	ShrubScrub	-0.016	0.151	0.021	92	-0.016	0.151	0.020
SWIR2	230	Forest	-0.012	0.102	0.019	92	-0.011	0.103	0.018
SWIR2	230	All	-0.017	0.167	0.028	83	-0.018	0.167	0.024
SWIR2	240	Grassland	-0.018	0.167	0.022	96	-0.018	0.168	0.021
SWIR2	240	Cropland	-0.014	0.183	0.044	37	-0.013	0.183	0.044
SWIR2	240	PastureHay	-0.013	0.150	0.035	51	-0.013	0.148	0.034
SWIR2	240	Water	-0.010	0.062	0.024	50	-0.009	0.055	0.022
SWIR2	240	Developed	-0.011	0.159	0.022	73	-0.011	0.160	0.020
SWIR2	240	Barren	-0.018	0.239	0.034	80	-0.018	0.237	0.028
SWIR2	240	Wetlands	-0.011	0.086	0.018	88	-0.010	0.081	0.016
SWIR2	240	ShrubScrub	-0.016	0.153	0.020	91	-0.015	0.152	0.019
SWIR2	240	Forest	-0.010	0.102	0.018	87	-0.010	0.103	0.017
SWIR2	240	All	-0.017	0.169	0.027	82	-0.017	0.170	0.024
SWIR2	250	Grassland	-0.017	0.167	0.022	96	-0.017	0.168	0.021
SWIR2	250	Cropland	-0.013	0.187	0.040	41	-0.013	0.187	0.040
SWIR2	250	PastureHay	-0.014	0.150	0.033	61	-0.014	0.148	0.032
SWIR2	250	Water	-0.010	0.062	0.024	53	-0.009	0.056	0.022
SWIR2	250	Developed	-0.012	0.159	0.022	77	-0.012	0.159	0.021
SWIR2	250	Barren	-0.017	0.238	0.033	80	-0.017	0.236	0.027
SWIR2	250	Wetlands	-0.008	0.088	0.018	60	-0.008	0.083	0.017
SWIR2	250	ShrubScrub	-0.015	0.152	0.019	94	-0.015	0.151	0.018
SWIR2	250	Forest	-0.009	0.102	0.018	78	-0.009	0.103	0.017
SWIR2	250	All	-0.016	0.170	0.026	83	-0.016	0.170	0.023
SWIR2	260	Grassland	-0.016	0.168	0.022	95	-0.015	0.169	0.021
SWIR2	260	Cropland	-0.012	0.189	0.038	38	-0.012	0.190	0.038
SWIR2	260	PastureHay	-0.012	0.152	0.031	53	-0.012	0.150	0.030
SWIR2	260	Water	-0.010	0.063	0.024	47	-0.008	0.057	0.023
SWIR2	260	Developed	-0.011	0.159	0.022	70	-0.011	0.159	0.020
SWIR2	260	Barren	-0.015	0.239	0.033	73	-0.015	0.236	0.028
SWIR2	260	Wetlands	-0.006	0.091	0.019	35	-0.005	0.085	0.018
SWIR2	260	ShrubScrub	-0.014	0.152	0.019	92	-0.013	0.151	0.018
SWIR2	260	Forest	-0.007	0.104	0.019	60	-0.007	0.104	0.017
SWIR2	260	All	-0.015	0.171	0.026	80	-0.015	0.171	0.023
SWIR2	270	Grassland	-0.015	0.168	0.021	91	-0.014	0.169	0.020
SWIR2	270	Cropland	-0.010	0.187	0.036	28	-0.010	0.188	0.035
SWIR2	270	PastureHay	-0.011	0.152	0.030	43	-0.011	0.150	0.028
SWIR2	270	Water	-0.010	0.064	0.024	42	-0.008	0.059	0.023
SWIR2	270	Developed	-0.010	0.158	0.021	63	-0.010	0.158	0.020
SWIR2	270	Barren	-0.016	0.236	0.034	73	-0.016	0.234	0.028
SWIR2	270	Wetlands	-0.006	0.097	0.020	31	-0.005	0.092	0.019
SWIR2	270	ShrubScrub	-0.012	0.150	0.019	85	-0.011	0.150	0.018
SWIR2	270	Forest	-0.006	0.106	0.020	49	-0.006	0.105	0.019
SWIR2	270	All	-0.014	0.171	0.025	75	-0.014	0.171	0.022
NDVI	120	Grassland	0.032	0.261	0.062	53	0.030	0.256	0.058
NDVI	120	Cropland	0.016	0.219	0.076	7	0.011	0.206	0.069
NDVI	120	PastureHay	0.014	0.309	0.103	4	0.014	0.303	0.101
NDVI	120	Water	-0.009	0.000	0.092	7	-0.007	0.021	0.084
NDVI	120	Developed	0.025	0.287	0.063	29	0.023	0.287	0.061
NDVI	120	Barren	0.012	0.172	0.039	38	0.016	0.180	0.033
NDVI	120	Wetlands	0.006	0.263	0.095	5	0.003	0.248	0.097
NDVI	120	ShrubScrub	0.018	0.238	0.053	16	0.018	0.239	0.051
NDVI	120	Forest	0.020	0.298	0.085	9	0.019	0.293	0.084
NDVI	120	All	0.027	0.260	0.070	38	0.026	0.257	0.062
NDVI	130	Grassland	0.028	0.281	0.073	44	0.027	0.277	0.070
NDVI	130	Cropland	0.009	0.243	0.098	4	0.004	0.232	0.093
NDVI	130	PastureHay	0.001	0.346	0.124	3	0.001	0.341	0.124
NDVI	130	Water	-0.015	0.014	0.096	10	-0.014	0.032	0.087
NDVI	130	Developed	0.020	0.304	0.070	24	0.019	0.306	0.067
NDVI	130	Barren	0.011	0.177	0.041	39	0.013	0.184	0.034
NDVI	130	Wetlands	-0.003	0.306	0.118	4	-0.004	0.291	0.119
NDVI	130	ShrubScrub	0.011	0.258	0.063	12	0.010	0.259	0.061
NDVI	130	Forest	0.006	0.333	0.105	5	0.007	0.330	0.104
NDVI	130	All	0.023	0.280	0.082	31	0.022	0.278	0.075
NDVI	140	Grassland	0.034	0.312	0.077	51	0.033	0.308	0.073
NDVI	140	Cropland	0.011	0.272	0.114	5	0.008	0.259	0.110
NDVI	140	PastureHay	0.009	0.385	0.127	7	0.009	0.379	0.126
NDVI	140	Water	-0.015	0.031	0.101	11	-0.013	0.047	0.092
NDVI	140	Developed	0.024	0.331	0.070	29	0.023	0.333	0.067
NDVI	140	Barren	0.018	0.191	0.051	52	0.022	0.196	0.046
NDVI	140	Wetlands	-0.013	0.367	0.123	3	-0.017	0.354	0.123
NDVI	140	ShrubScrub	0.025	0.292	0.072	25	0.025	0.295	0.069
NDVI	140	Forest	0.007	0.386	0.108	9	0.011	0.386	0.107
NDVI	140	All	0.028	0.312	0.089	37	0.030	0.310	0.080
NDVI	150	Grassland	0.052	0.344	0.079	80	0.049	0.340	0.075
NDVI	150	Cropland	0.022	0.323	0.144	11	0.018	0.316	0.145
NDVI	150	PastureHay	0.017	0.441	0.135	13	0.020	0.436	0.134
NDVI	150	Water	-0.003	0.055	0.103	10	-0.004	0.064	0.094
NDVI	150	Developed	0.036	0.358	0.071	55	0.036	0.360	0.066
NDVI	150	Barren	0.024	0.201	0.052	67	0.027	0.204	0.046
NDVI	150	Wetlands	0.012	0.423	0.130	6	0.011	0.409	0.133
NDVI	150	ShrubScrub	0.038	0.329	0.076	54	0.036	0.330	0.073
NDVI	150	Forest	0.025	0.436	0.111	20	0.026	0.436	0.109
NDVI	150	All	0.044	0.350	0.095	61	0.045	0.345	0.083
NDVI	160	Grassland	0.063	0.376	0.077	89	0.062	0.372	0.073
NDVI	160	Cropland	0.012	0.392	0.164	11	0.012	0.389	0.167
NDVI	160	PastureHay	0.016	0.495	0.134	15	0.017	0.494	0.132
NDVI	160	Water	0.000	0.084	0.105	13	0.000	0.092	0.093
NDVI	160	Developed	0.040	0.381	0.073	59	0.041	0.385	0.067
NDVI	160	Barren	0.030	0.200	0.052	73	0.032	0.197	0.047
NDVI	160	Wetlands	0.030	0.497	0.106	17	0.031	0.493	0.100
NDVI	160	ShrubScrub	0.049	0.354	0.069	78	0.049	0.354	0.065
NDVI	160	Forest	0.033	0.505	0.090	36	0.032	0.503	0.086
NDVI	160	All	0.051	0.388	0.097	68	0.056	0.382	0.082
NDVI	170	Grassland	0.077	0.383	0.072	97	0.077	0.378	0.067
NDVI	170	Cropland	0.027	0.431	0.163	22	0.031	0.435	0.167
NDVI	170	PastureHay	0.050	0.511	0.129	48	0.052	0.513	0.126
NDVI	170	Water	0.011	0.105	0.103	26	0.014	0.110	0.092
NDVI	170	Developed	0.050	0.383	0.072	76	0.051	0.385	0.066
NDVI	170	Barren	0.034	0.200	0.055	79	0.035	0.195	0.048
NDVI	170	Wetlands	0.048	0.534	0.094	58	0.048	0.536	0.086
NDVI	170	ShrubScrub	0.062	0.366	0.065	95	0.061	0.368	0.060
NDVI	170	Forest	0.053	0.525	0.077	86	0.051	0.516	0.072
NDVI	170	All	0.066	0.400	0.093	80	0.071	0.391	0.076
NDVI	180	Grassland	0.074	0.378	0.074	98	0.075	0.372	0.069
NDVI	180	Cropland	0.032	0.434	0.155	27	0.036	0.442	0.159
NDVI	180	PastureHay	0.058	0.499	0.130	61	0.059	0.500	0.129
NDVI	180	Water	0.014	0.106	0.105	33	0.020	0.114	0.093
NDVI	180	Developed	0.048	0.375	0.074	80	0.049	0.377	0.069
NDVI	180	Barren	0.032	0.194	0.059	81	0.033	0.188	0.053
NDVI	180	Wetlands	0.048	0.538	0.089	68	0.047	0.539	0.082
NDVI	180	ShrubScrub	0.064	0.362	0.064	98	0.063	0.364	0.060
NDVI	180	Forest	0.053	0.524	0.074	93	0.051	0.513	0.069
NDVI	180	All	0.065	0.394	0.094	83	0.070	0.385	0.078
NDVI	190	Grassland	0.071	0.362	0.077	98	0.072	0.355	0.073
NDVI	190	Cropland	0.038	0.421	0.153	33	0.041	0.434	0.155
NDVI	190	PastureHay	0.066	0.481	0.127	72	0.068	0.481	0.127
NDVI	190	Water	0.013	0.100	0.108	30	0.014	0.115	0.095
NDVI	190	Developed	0.048	0.361	0.076	84	0.048	0.361	0.072
NDVI	190	Barren	0.029	0.186	0.055	82	0.029	0.180	0.049
NDVI	190	Wetlands	0.044	0.541	0.089	69	0.042	0.551	0.082
NDVI	190	ShrubScrub	0.061	0.354	0.064	98	0.060	0.353	0.060
NDVI	190	Forest	0.052	0.512	0.075	95	0.051	0.501	0.071
NDVI	190	All	0.064	0.380	0.094	84	0.067	0.368	0.081
NDVI	200	Grassland	0.073	0.340	0.075	99	0.073	0.331	0.072
NDVI	200	Cropland	0.053	0.396	0.149	45	0.053	0.411	0.150
NDVI	200	PastureHay	0.076	0.455	0.125	83	0.077	0.454	0.125
NDVI	200	Water	0.013	0.096	0.105	31	0.015	0.117	0.095
NDVI	200	Developed	0.051	0.345	0.073	90	0.052	0.344	0.070
NDVI	200	Barren	0.028	0.179	0.055	83	0.027	0.173	0.048
NDVI	200	Wetlands	0.049	0.531	0.085	77	0.047	0.546	0.079
NDVI	200	ShrubScrub	0.062	0.339	0.065	98	0.062	0.337	0.061
NDVI	200	Forest	0.058	0.492	0.075	97	0.057	0.481	0.071
NDVI	200	All	0.068	0.357	0.092	88	0.070	0.346	0.080
NDVI	210	Grassland	0.067	0.322	0.074	98	0.068	0.313	0.072
NDVI	210	Cropland	0.051	0.361	0.147	40	0.050	0.371	0.149
NDVI	210	PastureHay	0.072	0.431	0.129	75	0.073	0.429	0.129
NDVI	210	Water	0.011	0.091	0.109	29	0.016	0.114	0.095
NDVI	210	Developed	0.050	0.331	0.073	88	0.050	0.330	0.070
NDVI	210	Barren	0.025	0.170	0.049	82	0.025	0.164	0.040
NDVI	210	Wetlands	0.049	0.527	0.085	76	0.047	0.547	0.081
NDVI	210	ShrubScrub	0.059	0.324	0.063	98	0.060	0.322	0.060
NDVI	210	Forest	0.057	0.475	0.075	97	0.056	0.463	0.071
NDVI	210	All	0.063	0.334	0.091	86	0.064	0.326	0.080
NDVI	220	Grassland	0.061	0.302	0.071	98	0.061	0.293	0.069
NDVI	220	Cropland	0.051	0.320	0.132	51	0.050	0.321	0.133
NDVI	220	PastureHay	0.070	0.400	0.118	81	0.071	0.394	0.117
NDVI	220	Water	0.010	0.081	0.109	32	0.013	0.109	0.097
NDVI	220	Developed	0.048	0.317	0.069	91	0.048	0.314	0.066
NDVI	220	Barren	0.024	0.163	0.049	85	0.024	0.157	0.042
NDVI	220	Wetlands	0.048	0.515	0.079	88	0.045	0.536	0.076
NDVI	220	ShrubScrub	0.057	0.303	0.062	98	0.055	0.300	0.060
NDVI	220	Forest	0.052	0.457	0.074	97	0.051	0.444	0.070
NDVI	220	All	0.058	0.310	0.086	88	0.059	0.303	0.076
NDVI	230	Grassland	0.053	0.285	0.066	98	0.052	0.276	0.064
NDVI	230	Cropland	0.036	0.294	0.120	39	0.036	0.291	0.119
NDVI	230	PastureHay	0.055	0.377	0.113	71	0.056	0.368	0.112
NDVI	230	Water	0.008	0.070	0.108	32	0.013	0.101	0.096
NDVI	230	Developed	0.043	0.310	0.068	88	0.043	0.306	0.064
NDVI	230	Barren	0.022	0.156	0.043	85	0.021	0.150	0.035
NDVI	230	Wetlands	0.048	0.498	0.077	91	0.046	0.518	0.073
NDVI	230	ShrubScrub	0.051	0.287	0.057	98	0.050	0.285	0.055
NDVI	230	Forest	0.048	0.440	0.070	97	0.047	0.430	0.066
NDVI	230	All	0.049	0.293	0.080	85	0.050	0.285	0.071
NDVI	240	Grassland	0.049	0.277	0.067	96	0.048	0.268	0.064
NDVI	240	Cropland	0.036	0.277	0.115	36	0.034	0.271	0.114
NDVI	240	PastureHay	0.053	0.365	0.113	65	0.053	0.354	0.111
NDVI	240	Water	0.008	0.059	0.110	32	0.014	0.097	0.097
NDVI	240	Developed	0.041	0.306	0.069	84	0.041	0.300	0.066
NDVI	240	Barren	0.021	0.152	0.043	83	0.021	0.147	0.035
NDVI	240	Wetlands	0.044	0.488	0.077	86	0.043	0.507	0.073
NDVI	240	ShrubScrub	0.049	0.277	0.056	97	0.049	0.274	0.054
NDVI	240	Forest	0.042	0.430	0.069	92	0.040	0.421	0.065
NDVI	240	All	0.046	0.283	0.080	82	0.047	0.274	0.072
NDVI	250	Grassland	0.043	0.266	0.066	94	0.043	0.258	0.063
NDVI	250	Cropland	0.031	0.260	0.102	38	0.029	0.252	0.101
NDVI	250	PastureHay	0.051	0.352	0.106	68	0.051	0.340	0.103
NDVI	250	Water	0.000	0.045	0.110	28	0.004	0.087	0.097
NDVI	250	Developed	0.040	0.302	0.068	83	0.040	0.296	0.066
NDVI	250	Barren	0.018	0.147	0.041	81	0.018	0.142	0.034
NDVI	250	Wetlands	0.028	0.463	0.085	40	0.026	0.480	0.084
NDVI	250	ShrubScrub	0.041	0.264	0.055	95	0.039	0.263	0.053
NDVI	250	Forest	0.032	0.412	0.073	73	0.031	0.402	0.071
NDVI	250	All	0.041	0.272	0.077	81	0.041	0.264	0.069
NDVI	260	Grassland	0.034	0.254	0.066	82	0.033	0.247	0.063
NDVI	260	Cropland	0.028	0.244	0.093	34	0.025	0.235	0.092
NDVI	260	PastureHay	0.043	0.332	0.101	57	0.043	0.320	0.098
NDVI	260	Water	-0.004	0.029	0.108	22	0.001	0.075	0.095
NDVI	260	Developed	0.035	0.294	0.069	71	0.035	0.287	0.067
NDVI	260	Barren	0.013	0.142	0.040	68	0.013	0.137	0.032
NDVI	260	Wetlands	0.012	0.438	0.092	13	0.011	0.458	0.092
NDVI	260	ShrubScrub	0.029	0.247	0.057	75	0.027	0.246	0.054
NDVI	260	Forest	0.019	0.383	0.081	38	0.019	0.378	0.080
NDVI	260	All	0.033	0.260	0.075	69	0.032	0.251	0.069
NDVI	270	Grassland	0.029	0.243	0.065	66	0.028	0.237	0.062
NDVI	270	Cropland	0.028	0.231	0.084	31	0.025	0.223	0.083
NDVI	270	PastureHay	0.038	0.315	0.096	44	0.037	0.304	0.094
NDVI	270	Water	-0.005	0.017	0.107	19	0.002	0.067	0.092
NDVI	270	Developed	0.034	0.285	0.068	62	0.034	0.278	0.067
NDVI	270	Barren	0.010	0.138	0.037	55	0.011	0.134	0.030
NDVI	270	Wetlands	0.014	0.394	0.095	10	0.013	0.409	0.094
NDVI	270	ShrubScrub	0.023	0.232	0.056	55	0.021	0.232	0.053
NDVI	270	Forest	0.016	0.353	0.084	30	0.016	0.351	0.082
NDVI	270	All	0.029	0.249	0.072	56	0.028	0.240	0.068
